# Supplementary material
Source: PubMed Central journal article supplement (PMC1617203)
Supplement: rsbl20050378s13.pdf [file rsbl20050378s13.pdf]

# ELECTRONIC APPENDIX

This is the Electronic Appendix to the article

The scaling and temperature dependence of vertebrate metabolism

by

Craig R. White, Nicole F. Phillips & Roger S. Seymour

*Biol. Lett.* ([doi:10.1098/rsbl.2005.0378](https://doi.org/10.1098/rsbl.2005.0378))

Electronic appendices are refereed with the text; however, no attempt is made to impose a uniform editorial style on the electronic appendices.

| Species                        | Mass (g) | Temperature (°C) | MR       | Species Average |                     | Reference |
|--------------------------------|----------|------------------|----------|-----------------|---------------------|-----------|
|                                |          |                  |          | Mass (g)        | Q <sub>10</sub> SMR |           |
| <b>Mammals</b>                 |          |                  |          |                 |                     |           |
| <i>Alopex lagopus</i>          | 3600     | 38.6             | 1374     | 3600            | 1291.356            | [1]       |
| <i>Canis latrans</i>           | 10000    | 37               | 2686.567 | 10000           | 2979.196            | [2]       |
| <i>Canis mesomelas</i>         | 7720     | 38               | 3860     | 7720            | 3860                | [3]       |
| <i>Cerdocyon thous</i>         | 5444     | 38.2             | 1524.318 | 5444            | 1493.122            | [4]       |
| <i>Fennecus zerda</i>          | 1215     | 38.8             | 583.2    | 1215            | 536.9037            | [5]       |
| <i>Vulpes macrotis</i>         | 1769     | 38               | 887.1403 | 1769            | 887.1403            | [2]       |
| <i>Vulpes vulpes</i>           | 4440     | 38.7             | 2442     | 4440            | 2271.51             | [6]       |
| <i>Acinonyx jubatus</i>        | 37900    | 39               | 8982     | 37900           | 8099.751            | [7]       |
| <i>Felis concolor</i>          | 37200    | 37.6             | 8841.7   | 37200           | 9215.021            | [8]       |
| <i>Felis pardalis</i>          | 10500    | 38               | 3126.3   | 10500           | 3126.3              | [8]       |
| <i>Felis serval</i>            | 10100    | 36.5             | 3137.2   | 10100           | 3663.484            | [8]       |
| <i>Felis wiedii</i>            | 3600     | 38               | 937.2    | 3600            | 937.2               | [8]       |
| <i>Felis yagouaroundi</i>      | 8400     | 38.4             | 1737     | 8400            | 1666.63             | [8]       |
| <i>Panthera leo</i>            | 98000    | 37.9             | 16954    | 98000           | 17130.2             | [8]       |
| <i>Panthera tigris</i>         | 137900   | 37.5             | 23994.6  | 137900          | 25267.61            | [8]       |
| <i>Galerella sanguinea</i>     | 540      | 38.7             | 410.4    | 540             | 381.7477            | [9]       |
| <i>Herpestes javanicus</i>     | 611      | 39.76            | 403.26   | 611             | 336.1698            | [10]      |
| <i>Suricata suricatta</i>      | 850      | 36.3             | 310.2498 | 850             | 369.8655            | [11]      |
| <i>Proteles cristatus</i>      | 8100     | 36.4             | 2194.3   | 8100            | 2589.037            | [8]       |
| <i>Eira barbara</i>            | 2950     | 38.4             | 1221.3   | 2950            | 1171.822            | [12]      |
| <i>Lutra lutra</i>             | 10000    | 38.14            | 4500     | 10000           | 4435.334            | [13, 14]  |
| <i>Martes americana</i>        | 900      | 37.95            | 594.9    | 900             | 597.9833            | [15]      |
| <i>Mustela erminea</i>         | 75       | 39.6             | 165      | 75              | 139.8433            | [1]       |
| <i>Mustela frenata</i>         | 225      | 39               | 240.5769 | 225             | 216.9465            | [16]      |
| <i>Mustela vison</i>           | 660      | 39               | 488.4    | 660             | 440.4273            | [17]      |
| <i>Spilogale putorius</i>      | 624      | 36.35            | 299.52   | 624             | 355.2328            | [18]      |
| <i>Taxidea taxus</i>           | 9000     | 38               | 2700     | 9000            | 2700                | [19]      |
| <i>Ailurus fulgens</i>         | 5740     | 37.6             | 878.22   | 5740            | 915.3009            | [12]      |
| <i>Bassariscus sumichrasti</i> | 1280     | 38.8             | 633.6    | 1280            | 583.3028            | [12]      |

| Species                           | Mass (g) | Temperature (°C) | MR       | Species Average |                     | Reference |
|-----------------------------------|----------|------------------|----------|-----------------|---------------------|-----------|
|                                   |          |                  |          | Mass (g)        | Q <sub>10</sub> SMR |           |
| <i>Nasua narica</i>               | 3670     | 38.6             | 1207.43  | 3670            | 1134.805            | [12]      |
| <i>Nasua nasua</i>                | 4000     | 36.4             | 992      | 4000            | 1170.453            | [12]      |
| <i>Potos flavus</i>               | 2343.3   | 36.07            | 795.9522 | 2343.333        | 972.0673            | [12]      |
| <i>Procyon lotor</i>              | 5075     | 38               | 1598.625 | 5075            | 1598.625            | [12]      |
| <i>Arctictis binturong</i>        | 14280    | 36.7             | 2284.8   | 14280           | 2613.485            | [12]      |
| <i>Arctogalidia trivirgata</i>    | 2010     | 36.2             | 552.75   | 2010            | 665.8114            | [12]      |
| <i>Fossa fossana</i>              | 2260     | 37.9             | 906.26   | 2260            | 915.6784            | [12]      |
| <i>Nandinia binotata</i>          | 4270     | 37.4             | 862.54   | 4270            | 917.7409            | [12]      |
| <i>Paradoxurus hermaphroditus</i> | 3160     | 36.45            | 759.98   | 3160            | 892.0708            | [12]      |
| <i>Peropteryx macrotis</i>        | 5        | 34.4             | 11.55    | 5               | 16.75818            | [20]      |
| <i>Sacropteryx bilineata</i>      | 7.8      | 35.5             | 14.508   | 7.8             | 18.78715            | [21]      |
| <i>Hipposideros galeritus</i>     | 8.5      | 31.9             | 9.35     | 8.5             | 17.5675             | [22]      |
| <i>Rhinonycteris aurantius</i>    | 8.27     | 36.1             | 16.2092  | 8.27            | 19.7276             | [23]      |
| <i>Macroderma gigas</i>           | 148      | 37               | 139.12   | 148             | 154.2734            | [24]      |
| <i>Eumops perotis</i>             | 56       | 32.6             | 39.76    | 56              | 69.48865            | [24]      |
| <i>Molossus molossus</i>          | 15.6     | 31.4             | 22.464   | 15.6            | 44.44636            | [24]      |
| <i>Tadarida brasiliensis</i>      | 16.9     | 36               | 20.28    | 16.9            | 24.93852            | [25]      |
| <i>Mormoops blainvilli</i>        | 8.6      | 32               | 7.998    | 8.6             | 14.8727             | [26]      |
| <i>Mormoops megalophylla</i>      | 16.5     | 36.9             | 24.42    | 16.5            | 27.36133            | [27]      |
| <i>Pteronotus davyi</i>           | 9.4      | 38.8             | 15.322   | 9.4             | 14.10569            | [27]      |
| <i>Pteronotus parnellii</i>       | 19.2     | 36.4             | 30.72    | 19.2            | 36.24628            | [27]      |
| <i>Pteronotus personatus</i>      | 14       | 37.5             | 22.96    | 14              | 24.17812            | [27]      |
| <i>Pteronotus quadridens</i>      | 4.9      | 31               | 6.125    | 4.9             | 12.63036            | [26]      |
| <i>Natalus tumidirostris</i>      | 5.4      | 32.2             | 8.316    | 5.4             | 15.14755            | [20]      |
| <i>Noctilio albiventris</i>       | 27       | 32               | 31.59    | 27              | 58.74324            | [24]      |
| <i>Noctilio leporinus</i>         | 61       | 33.8             | 70.76    | 61              | 109.238             | [24]      |
| <i>Anoura caudifera</i>           | 11.5     | 36.5             | 42.665   | 11.5            | 49.82231            | [24]      |
| <i>Artibeus jamaicensis</i>       | 45.2     | 36.4             | 76.84    | 45.2            | 90.66289            | [24]      |
| <i>Artibeus lituratus</i>         | 70.1     | 37.3             | 107.954  | 70.1            | 116.0566            | [24]      |
| <i>Carollia perspicillata</i>     | 14.9     | 36.4             | 43.061   | 14.9            | 50.80732            | [24]      |

| Species                                  | Mass (g) | Temperature (°C) | MR      | Species Average |                     | Reference |
|------------------------------------------|----------|------------------|---------|-----------------|---------------------|-----------|
|                                          |          |                  |         | Mass (g)        | Q <sub>10</sub> SMR |           |
| <i>Chrotopterus auritus</i>              | 96.1     | 37.2             | 141.267 | 96.1            | 153.4482            | [24]      |
| <i>Desmodus rotundus</i>                 | 29.4     | 35               | 34.692  | 29.4            | 47.30788            | [24]      |
| <i>Diaemus youngi</i>                    | 36.6     | 31.1             | 37.332  | 36.6            | 76.1905             | [24]      |
| <i>Diphylla ecaudata</i>                 | 27.8     | 32.4             | 38.642  | 27.8            | 68.94572            | [24]      |
| <i>Erophylla bombifrons</i>              | 16.1     | 32               | 17.71   | 16.1            | 32.93266            | [26]      |
| <i>Glossophaga soricina</i>              | 9.6      | 35.5             | 29.376  | 9.6             | 38.04049            | [24]      |
| <i>Koopmania concolor</i>                | 19.7     | 35.3             | 39.794  | 19.7            | 52.60794            | [24]      |
| <i>Leptonycteris curasoae yerbabuena</i> | 22       | 35.7             | 44      | 22              | 55.81178            | [24]      |
| <i>Macrotus californicus</i>             | 11.7     | 35               | 14.625  | 11.7            | 19.94344            | [28]      |
| <i>Monophyllus redmani</i>               | 8.7      | 34               | 11.136  | 8.7             | 16.83972            | [26]      |
| <i>Phyllostomus discolor</i>             | 33.5     | 34.6             | 47.905  | 33.5            | 68.08408            | [24]      |
| <i>Phyllostomus hastatus</i>             | 84.2     | 34.7             | 100.198 | 84.2            | 140.9398            | [24]      |
| <i>Platyrrhinus lineatus</i>             | 21.9     | 36.4             | 44.895  | 21.9            | 52.97125            | [24]      |
| <i>Rhinophylla pumilio</i>               | 9.5      | 34.7             | 18.62   | 9.5             | 26.19113            | [24]      |
| <i>Sturnira lilium</i>                   | 21.9     | 36.4             | 53.217  | 21.9            | 62.79031            | [24]      |
| <i>Tonatia bidens</i>                    | 27.4     | 37               | 55.074  | 27.4            | 61.07282            | [24]      |
| <i>Uroderma bilobatum</i>                | 16.2     | 35.1             | 31.59   | 16.2            | 42.63474            | [24]      |
| <i>Cynopterus brachyotis</i>             | 37.4     | 36.5             | 47.5    | 37.4            | 55.46841            | [29]      |
| <i>Dobsonia anderseni</i>                | 241.4    | 36.4             | 174     | 241.4           | 205.3012            | [29]      |
| <i>Dobsonia minor</i>                    | 73.7     | 36.5             | 74.4    | 73.7            | 86.88104            | [29]      |
| <i>Dobsonia moluccensis</i>              | 404.3    | 36.8             | 367.9   | 404.3           | 416.4966            | [29]      |
| <i>Dobsonia praedatrix</i>               | 179.5    | 37.1             | 142.5   | 179.5           | 156.3962            | [29]      |
| <i>Eonycteris spelaea</i>                | 51.6     | 34               | 48      | 51.6            | 72.58498            | [29]      |
| <i>Macroglossus minimus</i>              | 15.9     | 36.2             | 18.5    | 15.85           | 22.28405            | [29]      |
| <i>Melonycteris melanops</i>             | 53.3     | 34.9             | 43.3    | 53.3            | 59.65985            | [29]      |
| <i>Nyctimene albiventer</i>              | 30.9     | 35.9             | 27.3    | 30.9            | 33.91998            | [29]      |
| <i>Nyctimene cyclotis</i>                | 40.4     | 36               | 64.6    | 40.4            | 79.43928            | [29]      |
| <i>Nyctimene major</i>                   | 13.6     | 33               | 20.4    | 13.6            | 34.20874            | [30]      |
| <i>Paranyctimene raptor</i>              | 23.6     | 33.8             | 24.5    | 23.6            | 37.82264            | [29]      |
| <i>Pteropus giganteus</i>                | 562.2    | 36.7             | 290.7   | 562.2           | 332.5193            | [29]      |

| Species                               | Mass (g) | Temperature (°C) | MR       | Species Average |                     | Reference |
|---------------------------------------|----------|------------------|----------|-----------------|---------------------|-----------|
|                                       |          |                  |          | Mass (g)        | Q <sub>10</sub> SMR |           |
| <i>Pteropus hypomelanus</i>           | 520.8    | 35.7             | 290.1    | 520.8           | 367.9772            | [29]      |
| <i>Pteropus poliocephalus</i>         | 598      | 36.5             | 316.9    | 598             | 370.0618            | [29]      |
| <i>Pteropus pumilus</i>               | 194.2    | 36.1             | 126.4    | 194.2           | 153.8366            | [29]      |
| <i>Pteropus rodricensis</i>           | 254.5    | 36.5             | 134.9    | 254.5           | 157.5303            | [29]      |
| <i>Pteropus scapulatus</i>            | 362      | 37               | 242.54   | 362             | 268.9582            | [24]      |
| <i>Pteropus vampyrus</i>              | 1024.3   | 36.9             | 804.1    | 1024.3          | 900.9519            | [29]      |
| <i>Rousettus aegyptiacus</i>          | 146      | 34.8             | 122.6    | 146             | 170.677             | [29]      |
| <i>Rousettus amplexicaudatus</i>      | 91.5     | 36.5             | 104.3    | 91.5            | 121.7969            | [29]      |
| <i>Syconycteris australis</i>         | 15.9     | 35.9             | 21.85    | 15.9            | 27.14841            | [29]      |
| <i>Chalinolobus gouldii</i>           | 17.5     | 31.1             | 25.2     | 17.5            | 51.43042            | [31]      |
| <i>Eptesicus fuscus</i>               | 10.4     | 36               | 20.8     | 10.4            | 25.57797            | [25]      |
| <i>Histiotus velatus</i>              | 11.2     | 30.5             | 15.68    | 11.2            | 34.04916            | [24]      |
| <i>Miniopterus gigas (australis?)</i> | 107.2    | 35.6             | 94.336   | 107.2           | 120.904             | [23]      |
| <i>Miniopterus schreibersi</i>        | 10.91    | 37.7             | 25.9658  | 10.91           | 26.7838             | [23]      |
| <i>Myotis lucifuga</i>                | 5.2      | 37               | 8.918    | 5.2             | 9.889375            | [25]      |
| <i>Nyctophilus geoffroyi</i>          | 8        | 31.6             | 11.2     | 8               | 21.70635            | [31]      |
| <i>Heterohyrax brucei</i>             | 2000     | 36.7             | 720      | 2000            | 823.5772            | [6]       |
| <i>Procavia capensis</i>              | 2400     | 37               | 660      | 2400            | 731.8892            | [32]      |
| <i>Procavia habessinica</i>           | 2250     | 38               | 900      | 2250            | 900                 | [33]      |
| <i>Procavia johnstoni</i>             | 2750     | 39               | 1178.654 | 2750            | 1062.882            | [16, 34]  |
| <i>Chrysochloris asiatica</i>         | 44       | 33.95            | 51.48    | 44              | 78.25086            | [35, 36]  |
| <i>Eremitalpa granti namibensis</i>   | 20       | 33.58            | 10       | 20              | 15.79298            | [37]      |
| <i>Atelerix albiventris</i>           | 450      | 35.2             | 148.5    | 450             | 198.3583            | [38]      |
| <i>Echinosorex gymnura</i>            | 721.2    | 36.3             | 504.84   | 721.2           | 601.847             | [39]      |
| <i>Erinaceus concolor</i>             | 822.7    | 35.2             | 347.1794 | 822.7           | 463.7435            | [40]      |
| <i>Erinaceus europaeus</i>            | 750      | 34               | 337.5    | 750             | 510.3632            | [41]      |
| <i>Hemiechinus auritus</i>            | 400      | 33.75            | 152      | 400             | 235.871             | [41]      |
| <i>Hylomys suillus</i>                | 57.8     | 37.3             | 60.112   | 57.8            | 64.62375            | [42, 43]  |
| <i>Paraechinus aethiopicus</i>        | 450      | 34.19            | 112.5    | 450             | 166.8118            | [41]      |
| <i>Condylura cristata</i>             | 49       | 37.7             | 110.25   | 49              | 113.7232            | [44, 45]  |

| Species                            | Mass (g) | Temperature (°C) | MR       | Species Average |                     | Reference |
|------------------------------------|----------|------------------|----------|-----------------|---------------------|-----------|
|                                    |          |                  |          | Mass (g)        | Q <sub>10</sub> SMR |           |
| <i>Neurotrichus gibbsii</i>        | 11.8     | 38.4             | 46.492   | 11.8            | 44.60851            | [46]      |
| <i>Scalopus aquaticus</i>          | 48       | 36               | 67.68    | 48              | 83.22678            | [47]      |
| <i>Geogale aurita</i>              | 6.9      | 30.8             | 7.728    | 6.9             | 16.26886            | [48]      |
| <i>Microgale cowani</i>            | 12.2     | 33               | 31.964   | 12.2            | 53.6004             | [43, 49]  |
| <i>Microgale dobsoni</i>           | 44.6     | 30.9             | 56.4     | 44.6            | 117.5111            | [49]      |
| <i>Microgale talazaci</i>          | 44       | 30.8             | 43.56    | 44              | 91.70179            | [49]      |
| <i>Setifer setosus</i>             | 530      | 32.2             | 121.9    | 530             | 222.0403            | [38]      |
| <i>Tenrec ecaudatus</i>            | 650      | 33               | 130.65   | 650             | 219.0869            | [11, 34]  |
| <i>Elephantulus brachyrhynchus</i> | 45.3     | 37.5             | 43.70997 | 45.3            | 46.02896            | [38, 50]  |
| <i>Elephantulus edwardii</i>       | 50       | 37.6             | 54.5     | 50              | 56.80114            | [51]      |
| <i>Elephantulus intufi</i>         | 46.49    | 37.2             | 51.99907 | 46.49           | 56.48286            | [38, 50]  |
| <i>Elephantulus myurus</i>         | 62.97    | 36.86            | 66.30741 | 62.97           | 74.60186            | [52]      |
| <i>Elephantulus rozeti</i>         | 45.31    | 37.06            | 47.80205 | 45.31           | 52.68098            | [52]      |
| <i>Elephantulus rufescens</i>      | 53       | 37.3             | 56.869   | 53              | 61.13734            | [51]      |
| <i>Macroscelides proboscideus</i>  | 39       | 36.23            | 52.26    | 39              | 62.7545             | [53]      |
| <i>Petrodromus tetradactylus</i>   | 206.11   | 37.5             | 179.5218 | 206.11          | 189.0462            | [50]      |
| <i>Manis crassicaudata</i>         | 15910    | 33.4             | 1240.98  | 15910           | 1996.692            | [51]      |
| <i>Manis javanica</i>              | 4220     | 32.3             | 1105.64  | 4220            | 1993.203            | [51]      |
| <i>Manis tetradactyla</i>          | 1430     | 33               | 229.086  | 1430            | 384.1541            | [54]      |
| <i>Manis pentadactyla</i>          | 3637.5   | 33.41            | 667.845  | 3637.5          | 1073.428            | [54]      |
| <i>Manis tricuspis</i>             | 1365     | 32.58333333      | 276.003  | 1365            | 483.203             | [54]      |
| <i>Aotus trivirgatus</i>           | 820      | 38               | 442      | 820             | 442                 | [55]      |
| <i>Saimiri sciureus</i>            | 875      | 38               | 800.628  | 875             | 800.628             | [11, 56]  |
| <i>Cercopithecus mitis</i>         | 8500     | 37.5             | 3391.5   | 8500            | 3571.433            | [55]      |
| <i>Colobus guereza</i>             | 10450    | 37               | 2978     | 10450           | 3302.373            | [55]      |
| <i>Erythrocebus patas</i>          | 3000     | 39.3             | 1068     | 3000            | 933.683             | [55]      |
| <i>Papio anubis</i>                | 9500     | 37.27            | 2777.885 | 9500            | 2995.658            | [16]      |
| <i>Papio ursinus</i>               | 16900    | 37.03333333      | 5147     | 16900           | 5687.99             | [55]      |
| <i>Cheirogaleus medius</i>         | 300      | 38               | 195      | 300             | 195                 | [55]      |
| <i>Eulemur fulvus</i>              | 2330     | 36.5             | 746      | 2330            | 871.1459            | [55]      |

| Species                             | Mass (g) | Temperature (°C) | MR       | Species Average |                     | Reference |
|-------------------------------------|----------|------------------|----------|-----------------|---------------------|-----------|
|                                     |          |                  |          | Mass (g)        | Q <sub>10</sub> SMR |           |
| <i>Galago senegalensis</i>          | 171.5    | 37.85            | 137.2002 | 171.5           | 139.3445            | [57]      |
| <i>Loris tardigradus</i>            | 284      | 35.5             | 128      | 284             | 165.7538            | [55]      |
| <i>Nycticebus coucang</i>           | 1160     | 35.35            | 272.6    | 1160            | 358.5209            | [55]      |
| <i>Perodicticus potto</i>           | 964      | 36.05            | 326.6    | 964             | 399.5525            | [55]      |
| <i>Tarsius syrichta</i>             | 113      | 33.8             | 76.7     | 113             | 118.408             | [55]      |
| <i>Agouti paca</i>                  | 9156     | 37.2             | 2746.8   | 9156            | 2983.652            | [58]      |
| <i>Aplodontia rufa</i>              | 630      | 38               | 277.2    | 630             | 277.2               | [47]      |
| <i>Bathyergus janetta</i>           | 406      | 34.7             | 215.18   | 406             | 302.6749            | [59]      |
| <i>Bathyergus suillus</i>           | 620      | 35.3             | 303.8    | 620             | 401.6257            | [59]      |
| <i>Cryptomys bocagei</i>            | 94       | 33.7             | 69.56    | 94              | 108.5014            | [36]      |
| <i>Cryptomys damarensis</i>         | 138      | 35.2             | 78.66    | 138             | 105.0698            | [59-61]   |
| <i>Cryptomys darlingi</i>           | 60       | 33.3             | 58.8     | 60              | 95.5903             | [62]      |
| <i>Cryptomys hottentotus</i>        | 75       | 34.4             | 67.5     |                 |                     | [61]      |
| <i>Cryptomys hottentotus amatus</i> | 79.5     | 34.95            | 55.455   | 77.21723        | 86.28183            | [36, 63]  |
| <i>Cryptomys mechowii</i>           | 267      | 34               | 160.2    | 267             | 242.2524            | [36]      |
| <i>Georychus capensis</i>           | 195      | 36.4             | 115.666  | 194.8           | 136.4734            | [64, 65]  |
| <i>Heliophobius argentocinereus</i> | 88       | 35.1             | 74.8     | 88              | 100.9522            | [47]      |
| <i>Heterocephalus glaber</i>        | 32       | 32.1             | 20.48    | 32              | 37.69191            | [66, 67]  |
| <i>Capromys pilorides</i>           | 2630     | 35.7             | 604.9    | 2630            | 767.2851            | [58]      |
| <i>Cavia porcellus</i>              | 629      | 39               | 346      | 629             | 312.0145            | [58]      |
| <i>Dolichotis salinicola</i>        | 1613     | 38.4             | 725.9    | 1613            | 696.4922            | [58]      |
| <i>Galea musteloides</i>            | 322      | 37.3             | 264      | 322             | 283.8147            | [58]      |
| <i>Kerodon ruprestris</i>           | 801      | 38.2             | 360.5    | 801             | 353.1222            | [58]      |
| <i>Chinchilla laniger</i>           | 426      | 35.7             | 200.2    | 426             | 253.9436            | [58]      |
| <i>Lagostomus maximus</i>           | 6784     | 36.8             | 1899.5   | 6784            | 2150.408            | [58]      |
| <i>Ctenomys australis</i>           | 340      | 37.3             | 116.62   | 340             | 125.373             | [68]      |
| <i>Ctenomys fulvus</i>              | 300      | 36.2             | 189      | 300             | 227.6587            | [69, 70]  |
| <i>Ctenomys maulinus</i>            | 215      | 36.2             | 187.1    | 215             | 225.3701            | [58]      |
| <i>Ctenomys opimus</i>              | 214      | 36               | 109.7    | 214             | 134.8992            | [58]      |
| <i>Ctenomys peruanus</i>            | 490      | 35.2             | 220.5    | 490             | 294.532             | [58]      |

| Species                         | Mass (g) | Temperature (°C) | MR       | Species Average |                     | Reference |
|---------------------------------|----------|------------------|----------|-----------------|---------------------|-----------|
|                                 |          |                  |          | Mass (g)        | Q <sub>10</sub> SMR |           |
| <i>Ctenomys talarum</i>         | 121      | 36.1             | 109.626  | 121             | 133.4216            | [68]      |
| <i>Dasyprocta azarae</i>        | 3849     | 37.5             | 1886     | 3849            | 1986.06             | [58]      |
| <i>Dasyprocta leporina</i>      | 2687     | 38.3             | 1558.5   | 2687            | 1510.902            | [58]      |
| <i>Myoprocta acouchy</i>        | 914      | 35.4             | 502.7    | 914             | 657.7373            | [58]      |
| <i>Dipus sagitta?</i>           | 160      | 36.8             | 121.1538 | 160             | 137.1573            | [16, 71]  |
| <i>Jaculus jaculus</i>          | 75       | 37.45            | 92.25    | 75              | 97.64773            | [72]      |
| <i>Jaculus orientalis</i>       | 139      | 37               | 139.0002 | 139             | 154.1405            | [72]      |
| <i>Napaeozapus insignis</i>     | 22       | 37               | 39.6     | 22              | 43.91335            | [73]      |
| <i>Zapus hudsonicus</i>         | 23.8     | 37.3             | 35.7     | 23.8            | 38.37949            | [25]      |
| <i>Proechimys semispinosus</i>  | 498      | 37.9             | 313.7    | 498             | 316.9601            | [58]      |
| <i>Thrichomys apereoides</i>    | 323      | 37.6             | 206.7    | 323             | 215.4274            | [58]      |
| <i>Coendou prehensilis</i>      | 3280     | 36.7             | 918.4    | 3280            | 1050.518            | [58]      |
| <i>Geomys bursaris</i>          | 197      | 35               | 137.9    | 197             | 188.0479            | [74]      |
| <i>Geomys pinetis</i>           | 173      | 36.3             | 133.1534 | 172.95          | 158.7394            | [66, 75]  |
| <i>Thomomys bottae</i>          | 143      | 36               | 120.12   | 143             | 147.7128            | [76]      |
| <i>Thomomys talpoides</i>       | 106.8    | 36.2             | 142.044  | 106.8           | 171.0982            | [77, 78]  |
| <i>Thomomys umbrinus</i>        | 85       | 34.6             | 72.25    | 85              | 102.6839            | [77]      |
| <i>Chaetodipus baileyi</i>      | 29.1     | 32.5             | 34.5417  | 29.1            | 60.99599            | [79]      |
| <i>Chaetodipus californicus</i> | 22       | 38               | 21.34    | 22              | 21.34               | [80]      |
| <i>Chaetodipus fallax</i>       | 19.6     | 32.6             | 26.852   | 19.6            | 46.9293             | [79]      |
| <i>Chaetodipus hispidus</i>     | 39.5     | 36.8             | 49.375   | 39.5            | 55.89703            | [81]      |
| <i>Chaetodipus intermedius</i>  | 15.0     | 36               | 17.86525 | 14.95           | 21.96908            | [77]      |
| <i>Dipodomys agilis</i>         | 60.6     | 37               | 63.63    | 60.6            | 70.56077            | [82]      |
| <i>Dipodomys deserti</i>        | 106      | 36.8             | 92.22    | 106             | 104.4015            | [83]      |
| <i>Dipodomys merriami</i>       | 36.5     | 37               | 42.4595  | 36.5            | 47.08432            | [82, 84]  |
| <i>Dipodomys microps</i>        | 57.2     | 35               | 66.924   | 57.2            | 91.26117            | [85]      |
| <i>Dipodomys ordii</i>          | 46.8     | 34.6             | 64.2096  | 46.8            | 91.25668            | [79]      |
| <i>Dipodomys panamintinus</i>   | 64.2     | 36.9             | 74.2794  | 64.2            | 83.22617            | [71, 79]  |
| <i>Heteromys anomalus</i>       | 69.3     | 36               | 100.485  | 69.3            | 123.5674            | [83]      |
| <i>Heteromys desmarestianus</i> | 75.8     | 33.8             | 99.1464  | 75.8            | 153.0604            | [79]      |



| Species                           | Mass (g) | Temperature (°C) | MR       | Species Average |                     | Reference |
|-----------------------------------|----------|------------------|----------|-----------------|---------------------|-----------|
|                                   |          |                  |          | Mass (g)        | Q <sub>10</sub> SMR |           |
| <i>Liomys irroratus</i>           | 48.1     | 37               | 53.872   | 48.1            | 59.7399             | [86]      |
| <i>Liomys salvani</i>             | 43.8     | 37               | 46.866   | 43.8            | 51.97078            | [86]      |
| <i>Microdipodops megacephalus</i> | 11       | 32.8             | 30.173   | 11              | 51.65421            | [79]      |
| <i>Microdipodops pallidus</i>     | 15.2     | 39.3             | 19.76    | 15.2            | 17.27488            | [87]      |
| <i>Perognathus flavus</i>         | 8.3      | 34.6             | 17.3055  | 8.3             | 24.59511            | [79]      |
| <i>Perognathus longimembris</i>   | 8.9      | 34.7             | 9.523    | 8.9             | 13.39517            | [88]      |
| <i>Hydrochaeris hydrochaeris</i>  | 26385    | 37.1             | 6596.3   | 26385           | 7239.551            | [58]      |
| <i>Hystrix africaeaustralis</i>   | 11300    | 37.45            | 2361.702 | 11300           | 2499.89             | [89]      |
| <i>Abrothrix longipilis</i>       | 42.3     | 37.4             | 57.528   | 42.3            | 61.20968            | [90]      |
| <i>Acomys cahirinus</i>           | 42       | 37.5             | 46.2     | 42              | 48.6511             | [91]      |
| <i>Acomys russatus</i>            | 55.55    | 37.25            | 42.9     | 55.55           | 46.35892            | [91, 92]  |
| <i>Aethomys namaquensis</i>       | 64.2     | 36.82            | 56.7528  | 64.2            | 64.11667            | [93]      |
| <i>Akodon azarae</i>              | 24       | 37.7             | 40.8     | 24              | 42.08531            | [90]      |
| <i>Apodemus flavicollis</i>       | 23.9     | 36.7             | 43.259   | 23.9            | 49.48212            | [94]      |
| <i>Apodemus hermonensis</i>       | 20.5     | 37               | 50.02    | 20.5            | 55.46833            | [94]      |
| <i>Apodemus mystacinus</i>        | 40.4     | 35.5             | 56.0348  | 40.4            | 72.56234            | [92, 95]  |
| <i>Apodemus sylvaticus</i>        | 23.9     | 36.7             | 43.259   | 23.9            | 49.48212            | [92, 95]  |
| <i>Arborimus longicaudus</i>      | 21.8     | 37.3             | 58.86    | 21.8            | 63.27778            | [96]      |
| <i>Arvicola terrestris</i>        | 92.0     | 37.5             | 106.6813 | 91.96667        | 112.3412            | [96]      |
| <i>Auliscomys micropus</i>        | 62.3     | 37.4             | 97.811   | 62.3            | 104.0707            | [90]      |
| <i>Baiomys taylori</i>            | 7.15     | 36               | 17.0886  | 7.15            | 21.01403            | [11, 71]  |
| <i>Calomys musculus</i>           | 16.9     | 36.2             | 27.59772 | 16.9            | 33.24265            | [90]      |
| <i>Calomys venustus</i>           | 50.1     | 37.05            | 74.7     | 50.1            | 82.40943            | [90, 97]  |
| <i>Cannomys badius</i>            | 344      | 36               | 172      | 344             | 211.5102            | [47]      |
| <i>Chelemys macronyx</i>          | 62       | 36.8             | 84.32    | 62              | 95.45798            | [90]      |
| <i>Chroeomys anadinus</i>         | 34.6     | 37.7             | 64.702   | 34.6            | 66.74029            | [90]      |
| <i>Chroeomys olivaceus</i>        | 27       | 37.2             | 49.41    | 27              | 53.67054            | [90]      |
| <i>Clethrionomys californicus</i> | 18.3     | 37.5             | 61.122   | 18.3            | 64.36477            | [96]      |
| <i>Clethrionomys gapperi</i>      | 22.3     | 37.9             | 49.33938 | 22.25           | 49.85214            | [96]      |
| <i>Cricetomys gambianus</i>       | 1870     | 35.6             | 1140.7   | 1870            | 1461.958            | [98]      |

| Species                          | Mass (g) | Temperature (°C) | MR       | Species Average |                     | Reference |
|----------------------------------|----------|------------------|----------|-----------------|---------------------|-----------|
|                                  |          |                  |          | Mass (g)        | Q <sub>10</sub> SMR |           |
| <i>Cricetulus migratorius</i>    | 30.7     | 38.1             | 43.901   | 30.7            | 43.44945            | [95]      |
| <i>Cricetus cricetus</i>         | 362      | 39.5             | 231.6798 | 362             | 198.3975            | [11, 71]  |
| <i>Desmodillus auricularis</i>   | 71.93    | 35.86            | 87.7546  | 71.93           | 109.4861            | [99]      |
| <i>Dicrostonyx groenlandicus</i> | 59.62    | 38.4             | 98.84996 | 59.62           | 94.84533            | [96]      |
| <i>Eligmodontia typus</i>        | 17.5     | 36.4             | 29.925   | 17.5            | 35.30826            | [90]      |
| <i>Gerbillurus pæba</i>          | 33.9     | 38.7             | 34.8153  | 33.9            | 32.38465            | [100]     |
| <i>Gerbillurus setzeri</i>       | 46.1     | 37.6             | 37.0183  | 46.1            | 38.58131            | [100]     |
| <i>Gerbillurus tytonis</i>       | 29.9     | 36.9             | 31.694   | 29.9            | 35.51146            | [100]     |
| <i>Gerbillurus vallinus</i>      | 38.8     | 37.4             | 34.7648  | 38.8            | 36.98968            | [100]     |
| <i>Gerbillus allenybi</i>        | 35.3     | 36.3             | 38.83    | 35.3            | 46.29134            | [101]     |
| <i>Gerbillus dasyurus</i>        | 27.6     | 38.6             | 29.256   | 27.6            | 27.49629            | [92]      |
| <i>Gerbillus gerbillus</i>       | 29.7     | 37.2             | 42.471   | 29.7            | 46.1332             | [95]      |
| <i>Gerbillus nanus</i>           | 28.4     | 38.8             | 22.152   | 28.4            | 20.3935             | [95]      |
| <i>Gerbillus pusillus</i>        | 12.6     | 34.6             | 13.482   | 12.6            | 19.16104            | [102]     |
| <i>Gerbillus pyramidum</i>       | 108.5    | 36.1             | 81.375   | 108.5           | 99.0384             | [103]     |
| <i>Graomys griseoflavus</i>      | 69.4     | 36.1             | 83.974   | 69.4            | 102.2015            | [90]      |
| <i>Hydromys chrysogaster</i>     | 900      | 36.6             | 528.3    | 900             | 610.58              | [104]     |
| <i>Isthmomys pirrensis</i>       | 137.9    | 37.6             | 121.3518 | 137.9           | 126.4756            | [105]     |
| <i>Lagurus curtatus</i>          | 30.3     | 37.1             | 50.298   | 30.3            | 55.20291            | [96]      |
| <i>Lemmus lemmus</i>             | 80       | 37.8             | 192      | 80              | 196.0115            | [106]     |
| <i>Lemmus sibericus</i>          | 50.2     | 38.3             | 90.19267 | 50.2            | 87.43812            | [96]      |
| <i>Lemniscomys griselda</i>      | 47.5     | 36.9             | 57.6175  | 47.5            | 64.55739            | [92]      |
| <i>Lemniscomys rosalia</i>       | 50.53    | 36.5             | 61.473   | 50.53           | 71.78546            | [107]     |
| <i>Malacothrix typica</i>        | 21.7     | 37               | 20.615   | 21.7            | 22.86045            | [108]     |
| <i>Maresomys boliviensis</i>     | 76.8     | 36.3             | 110.592  | 76.8            | 131.8427            | [90]      |
| <i>Mastomys natalensis</i>       | 41.5     | 38               | 32.785   | 41.5            | 32.785              | [109]     |
| <i>Megadontomys thomasi</i>      | 110.8    | 37.8             | 124.0962 | 110.8           | 126.689             | [11, 71]  |
| <i>Meriones hurriane</i>         | 69       | 36.1             | 54.51    | 69              | 66.34204            | [110]     |
| <i>Meriones tristrami</i>        | 112      | 36.5             | 98.56    | 112             | 115.094             | [95]      |
| <i>Meriones unguiculatus</i>     | 67       | 38.2             | 77.0502  | 67              | 75.47333            | [111]     |

| Species                                 | Mass (g) | Temperature (°C) | MR       | Species Average |                     | Reference  |
|-----------------------------------------|----------|------------------|----------|-----------------|---------------------|------------|
|                                         |          |                  |          | Mass (g)        | Q <sub>10</sub> SMR |            |
| <i>Mesocricetus auratus</i>             | 98       | 38.1             | 147      | 98              | 145.488             | [71]       |
| <i>Micromys minutus</i>                 | 7.37     | 38               | 21.078   | 7.37            | 21.078              | [11, 71]   |
| <i>Microtus agrestis</i>                | 28       | 37.6             | 63.6     | 28              | 66.28537            | [112]      |
| <i>Microtus arvalis</i>                 | 20       | 37               | 61.9998  | 20              | 68.753              | [11, 113]  |
| <i>Microtus brandti</i>                 | 40.2     | 36.2             | 76.782   | 40.2            | 92.48726            | [111, 114] |
| <i>Microtus breweri</i>                 | 53.1     | 37.3             | 73.809   | 53.1            | 79.34879            | [115]      |
| <i>Microtus californicus</i>            | 44       | 38.8             | 68.2     | 44              | 62.78607            | [96]       |
| <i>Microtus guentheri</i>               | 43.8     | 38.3             | 80.154   | 43.8            | 77.70604            | [95]       |
| <i>Microtus longicaudus</i>             | 28.6     | 38               | 67.52075 | 28.55           | 67.52075            | [96]       |
| <i>Microtus mexicanus</i>               | 28.8     | 37.9             | 46.944   | 28.8            | 47.43187            | [96]       |
| <i>Microtus montanus</i>                | 35.1     | 35.3             | 83.33406 | 35.125          | 110.1682            | [96]       |
| <i>Microtus ochrogaster</i>             | 46.7     | 37.93333333      | 79.07867 | 46.7            | 79.62561            | [96]       |
| <i>Microtus oeconomus</i>               | 33.7     | 38.4             | 100.9315 | 33.7            | 96.84254            | [96]       |
| <i>Microtus pennsylvanicus</i>          | 38.9     | 38.5             | 75.077   | 38.9            | 71.29453            | [96]       |
| <i>Microtus pinetorum</i>               | 25.5     | 38.3             | 58.395   | 25.5            | 56.61158            | [96]       |
| <i>Microtus richardsoni</i>             | 65.65    | 38.7             | 128.0175 | 65.65           | 119.0799            | [96]       |
| <i>Microtus xanthognathus</i>           | 68.5     | 38               | 98.64    | 68.5            | 98.64               | [96]       |
| <i>Mus minutoides</i>                   | 8.06     | 36.3             | 24.0188  | 8.06            | 28.63411            | [116]      |
| <i>Myopus schisticolor</i>              | 26.4     | 39               | 93.456   | 26.4            | 84.27637            | [117]      |
| <i>Mystromys albicaudatus</i>           | 93.78    | 33               | 126.7908 | 93.78           | 212.6154            | [118]      |
| <i>Nannospalax ehrenbergi</i> (2n = 52) | 138      | 34.9             | 118.68   | 138             | 163.5204            | [95, 119]  |
| <i>Nannospalax ehrenbergi</i> (2n = 54) | 134      | 35.8             | 101.84   | 134             | 127.8502            | [95, 119]  |
| <i>Nannospalax ehrenbergi</i> (2n = 58) | 135      | 36               | 114.75   | 135             | 141.1092            | [95, 119]  |
| <i>Nannospalax ehrenbergi</i> (2n = 60) | 134      | 35.5             | 82.832   | 133.6           | 107.2634            | [95, 119]  |
| <i>Nannospalax leucodon</i>             | 201      | 36.3             | 148.74   | 201             | 177.321             | [47]       |
| <i>Neofiber alleni</i>                  | 258.1    | 37.1             | 216.804  | 258.1           | 237.9461            | [96]       |
| <i>Neotoma fuscipes</i>                 | 187      | 36.6             | 147.73   | 187             | 170.7382            | [6]        |
| <i>Neotoma lepida</i>                   | 110      | 36.8             | 86.9     | 110             | 98.37878            | [6]        |
| <i>Notomys alexis</i>                   | 32.3     | 38               | 45.22    | 32.3            | 45.22               | [120]      |
| <i>Notomys cervinus</i>                 | 34.2     | 38.45            | 41.724   | 34.2            | 39.82725            | [120]      |

| Species                                    | Mass (g) | Temperature (°C) | MR       | Species Average |                     | Reference  |
|--------------------------------------------|----------|------------------|----------|-----------------|---------------------|------------|
|                                            |          |                  |          | Mass (g)        | Q <sub>10</sub> SMR |            |
| <i>Ochrotomys nuttalli</i>                 | 19.5     | 36.38            | 27.105   | 19.5            | 32.04717            | [121]      |
| <i>Oligoryzomys longicaudatus</i>          | 28.2     | 37.3             | 51.042   | 28.2            | 54.87299            | [90]       |
| <i>Ondatra zibethicus</i>                  | 1004.6   | 37.4             | 642.944  | 1004.6          | 684.0912            | [96]       |
| <i>Otomys irroratus</i>                    | 102      | 37.6             | 84.864   | 102             | 88.44719            | [92]       |
| <i>Otomys sloggetti</i>                    | 113.29   | 38               | 133.6822 | 113.29          | 133.6822            | [122]      |
| <i>Otomys unisulcatus</i>                  | 96       | 34.8             | 106.56   | 96              | 148.347             | [123]      |
| <i>Oxymycterus roberti</i>                 | 83.5     | 38.25            | 91.015   | 83.5            | 88.69265            | [51]       |
| <i>Parotomys brantsii</i>                  | 86.5     | 35.1             | 83.905   | 86.5            | 113.2405            | [123]      |
| <i>Peromyscus californicus</i>             | 47.6     | 36.4             | 52.36    |                 |                     | [80, 124]  |
| <i>Peromyscus californicus insignis</i>    | 45.5     | 36               | 45.5     |                 |                     | [71]       |
| <i>Peromyscus californicus parasiticus</i> | 49.6     | 36.4             | 58.032   | 47.52052        | 61.85696            | [124]      |
| <i>Peromyscus crinitus</i>                 | 15.9     | 35.7             | 25.122   | 15.9            | 31.86599            | [124]      |
| <i>Peromyscus eremicus</i>                 | 21.5     | 36.6             | 33.11    | 21.5            | 38.26671            | [124]      |
| <i>Peromyscus gossypinus</i>               | 21.5     | 37.5             | 36.9798  | 21.5            | 38.94173            | [125, 126] |
| <i>Peromyscus leucopus</i>                 | 20       | 36.7             | 33.2     |                 |                     | [25]       |
| <i>Peromyscus leucopus noveboracensis</i>  | 26       | 37.5             | 57.2     | 22.80351        | 47.82757            | [71]       |
| <i>Peromyscus maniculatus</i>              | 22.8     | 36.55            | 36.88038 | 22.825          | 42.84522            | [124, 127] |
| <i>Peromyscus maniculatus artemisidae</i>  | 23.19    | 37.2             | 46.1481  | 23.19           | 50.12737            | [128]      |
| <i>Peromyscus maniculatus austerus</i>     | 19.53    | 36.3             | 39.8412  | 19.53           | 47.49684            | [128]      |
| <i>Peromyscus maniculatus gambeli</i>      | 19.1     | 36.8             | 38.964   |                 |                     | [124]      |
| <i>Peromyscus maniculatus nebrascensis</i> | 18.93    | 35.9             | 39.3744  |                 |                     | [128]      |
| <i>Peromyscus maniculatus sonoriensis</i>  | 20.38    | 36.7             | 37.4992  | 20.58892        | 45.97425            | [128]      |
| <i>Peromyscus oreas</i>                    | 24.58    | 36.2             | 43.5066  | 24.58           | 52.40559            | [128]      |
| <i>Peromyscus sitkensis</i>                | 28.3     | 36               | 46.7445  | 28.33           | 57.48219            | [128]      |
| <i>Peromyscus truei gilberti</i>           | 33.3     | 36.4             | 62.604   | 33.3            | 73.86595            | [124]      |
| <i>Peromyscus truei truei</i>              | 33.2     | 36.7             | 50.796   | 33.2            | 58.10337            | [124]      |
| <i>Phenacomys intermedius</i>              | 21.5     | 37.9             | 67.295   | 21.5            | 67.99437            | [96]       |
| <i>Phodopus sungorus</i>                   | 25.7     | 36.1             | 40.863   |                 |                     | [129]      |
| <i>Phyllotis darwini darwini</i>           | 59       | 36.2             | 71.39    |                 |                     | [90]       |
| <i>Phyllotis darwini rupestris</i>         | 36       | 37.1             | 45.36    | 37.93405        | 59.7121             | [130]      |

| Species                            | Mass (g) | Temperature (°C) | MR       | Species Average |                     | Reference      |
|------------------------------------|----------|------------------|----------|-----------------|---------------------|----------------|
|                                    |          |                  |          | Mass (g)        | Q <sub>10</sub> SMR |                |
| <i>Phyllotis xanthopygus</i>       | 55       | 37.3             | 56.65    | 55              | 60.90191            | [90]           |
| <i>Pseudomys gracilicaudatus</i>   | 79.8     | 36.8             | 83.79    | 79.8            | 94.85798            | [131]          |
| <i>Pseudomys hermannsburgensis</i> | 12.2     | 37.75            | 23.3022  | 12.2            | 23.91235            | [132]          |
| <i>Rattus fuscipes</i>             | 76       | 37.45            | 84.36    | 76              | 89.29607            | [133]          |
| <i>Rattus lutreolis</i>            | 109      | 36.7             | 63.2202  | 109             | 72.31488            | [134]          |
| <i>Rattus villosissimus</i>        | 250.6    | 35.9             | 145.8492 | 250.6           | 181.2162            | [135]          |
| <i>Reithrodontomys megalotis</i>   | 9.0      | 36.8             | 22.5     | 9               | 25.47207            | [127, 136]     |
| <i>Rhabdomys pumilio</i>           | 39.6     | 37               | 32.076   | 39.6            | 35.56981            | [92]           |
| <i>Saccostomus campestris</i>      | 61.3     | 35.25            | 51.492   | 61.3            | 68.42559            | [137]          |
| <i>Scotinomys teguina</i>          | 12       | 37.6             | 31.2     | 12              | 32.51735            | [138]          |
| <i>Scotinomys xerampelinus</i>     | 15.2     | 36.2             | 31.92    | 15.2            | 38.44903            | [138]          |
| <i>Sekeetamys calurus</i>          | 56.9     | 37.5             | 44.382   | 56.9            | 46.73665            | [92]           |
| <i>Sigmodon hispidus</i>           | 139.3    | 38.1             | 230.4024 | 139.3           | 228.0326            | [139]          |
| <i>Steatomys pratensis</i>         | 37.54    | 34.1             | 18.7698  | 37.54           | 28.09151            | [11, 140]      |
| <i>Tachyoryctes splendens</i>      | 191      | 35.9             | 150.89   | 191             | 187.4793            | [47]           |
| <i>Tatera afra</i>                 | 106.5    | 34               | 182.115  | 106.5           | 275.392             | [141]          |
| <i>Tatera leucogaster</i>          | 157.62   | 35.08            | 132.5584 | 157.62          | 179.2748            | [99]           |
| <i>Thallomys paedulcus</i>         | 132.4    | 36.715           | 87.26808 | 132.425         | 99.66752            | [93]           |
| <i>Myoxus glis</i>                 | 200      | 37.7             | 158      | 200             | 162.9774            | [25]           |
| <i>Muscardenis avellanarius</i>    | 23.5     | 35.8             | 62.98    | 23.5            | 79.06526            | [25]           |
| <i>Aconaemys fuscus</i>            | 112      | 37.3             | 120.96   | 112             | 130.0387            | [69]           |
| <i>Octodon degus</i>               | 192.9625 | 37.6             | 170.244  | 192.9625        | 177.4321            | [58, 142]      |
| <i>Octodontomys gliroides</i>      | 152      | 37.2             | 130.7    | 152             | 141.97              | [58]           |
| <i>Octomys mimax</i>               | 118.6    | 36.7             | 115.042  | 118.6           | 131.5916            | [143]          |
| <i>Spalacopus cyanus</i>           | 135      | 36.45            | 106.8    | 135.3335        | 125.3627            | [47, 58, 144]  |
| <i>Tympanoctomys barrerae</i>      | 71.4     | 35.7             | 77.112   | 71.4            | 97.81268            | [143]          |
| <i>Pedetes capensis</i>            | 2300     | 35.9             | 793.5    | 2300            | 985.9158            | [145]          |
| <i>Ammospermophilus leucurus</i>   | 95.7     | 37.5             | 93.882   | 95.7            | 98.86283            | [11, 146, 147] |
| <i>Cynomys ludovicianus</i>        | 1112.3   | 36.7             | 422.6742 | 1112.3          | 483.4789            | [148]          |
| <i>Funisciurus congicus</i>        | 112.3    | 39.275           | 95.454   | 112.3           | 83.6652             | [149]          |

| Species                              | Mass (g) | Temperature (°C) | MR       | Species Average |                     | Reference  |
|--------------------------------------|----------|------------------|----------|-----------------|---------------------|------------|
|                                      |          |                  |          | Mass (g)        | Q <sub>10</sub> SMR |            |
| <i>Glaucomys volans</i>              | 64.25    | 39               | 67.4625  | 64.25           | 60.83606            | [150]      |
| <i>Marmota flaviventris</i>          | 4295     | 36.5             | 1546.2   | 4295            | 1805.584            | [148]      |
| <i>Marmota monax</i>                 | 2650     | 37               | 662.502  | 2650            | 734.6637            | [151]      |
| <i>Paraxerus cepapi</i>              | 223.6    | 39.07            | 145.34   | 223.6           | 130.119             | [149]      |
| <i>Paraxerus palliatus ornatus</i>   | 366.6    | 39.3             | 260.286  |                 |                     | [149]      |
| <i>Paraxerus palliatus tongensis</i> | 206      | 38.805           | 175.1    | 274.8083        | 191.474             | [149]      |
| <i>Sciurus aberti</i>                | 624      | 40.7             | 430.56   | 624             | 325.6866            | [152]      |
| <i>Sciurus carolinensis</i>          | 440      | 38.7             | 369.6    | 440             | 343.7961            | [153]      |
| <i>Spermophilus armatus</i>          | 320      | 35.73333333      | 147.2    | 320             | 186.0734            | [154]      |
| <i>Spermophilus beecheyi</i>         | 599.6    | 37.6             | 317.7882 | 599.6           | 331.2061            | [155]      |
| <i>Spermophilus beldingi</i>         | 303      | 35.5             | 127.26   | 303             | 164.7955            | [154]      |
| <i>Spermophilus citellus</i>         | 240      | 37.5             | 228      | 240             | 240.0963            | [71]       |
| <i>Spermophilus lateralis</i>        | 237      | 36.3             | 143.4    | 237             | 170.9549            | [25, 71]   |
| <i>Spermophilus mohavensis</i>       | 240      | 37               | 112.8    | 240             | 125.0865            | [71]       |
| <i>Spermophilus parryi</i>           | 650      | 37               | 520      | 650             | 576.6399            | [25]       |
| <i>Spermophilus richardsoni</i>      | 274      | 35.45            | 131.52   | 274             | 171.1947            | [154]      |
| <i>Spermophilus spilosoma</i>        | 174      | 36.13333333      | 92.22    | 174             | 111.8513            | [154]      |
| <i>Spermophilus tereticaudus</i>     | 167      | 36.3             | 93.52    | 167             | 111.4902            | [154]      |
| <i>Spermophilus townsendii</i>       | 229      | 35.575           | 105.34   | 229             | 135.3565            | [154]      |
| <i>Spermophilus tridecemlineatus</i> | 205.4    | 35.7             | 140.4414 | 205.4333        | 178.1428            | [71] [156] |
| <i>Spermophilus undulatus</i>        | 680      | 38               | 667.08   | 680             | 667.08              | [1]        |
| <i>Tamias amoenus</i>                | 57.1     | 37               | 96.2706  | 57.1            | 106.7567            | [157, 158] |
| <i>Tamias merriami</i>               | 75       | 37               | 78.75    | 75              | 87.32768            | [159]      |
| <i>Tamias minimus</i>                | 45.8     | 37               | 72.7302  | 45.8            | 80.65219            | [157, 160] |
| <i>Tamias striatus</i>               | 87.4     | 38.15            | 90.022   | 87.4            | 88.63667            | [161]      |
| <i>Tamiasciurus hudsonicus</i>       | 228.3    | 38.65            | 254.5545 | 228.3           | 238.0098            | [162]      |
| <i>Xerus inauris</i>                 | 542      | 36.8             | 326.284  | 542             | 369.3835            | [163]      |
| <i>Xerus princeps</i>                | 602      | 37.6             | 340.13   | 602             | 354.4912            | [92]       |
| <i>Ptilocercus lowii</i>             | 58       | 36.5             | 43.5     | 58              | 50.79738            | [164]      |
| <i>Tupaia glis</i>                   | 123      | 37               | 93.48    | 123             | 103.6621            | [165]      |

| Species                          | Mass (g) | Temperature (°C) | MR       | Species Average |                     | Reference |
|----------------------------------|----------|------------------|----------|-----------------|---------------------|-----------|
|                                  |          |                  |          | Mass (g)        | Q <sub>10</sub> SMR |           |
| <i>Oryzomys afer</i>             | 48000    | 34.5             | 6144     | 48000           | 8822.792            | [51]      |
| <i>Bradypus variegatus</i>       | 3790     | 33               | 685.992  | 3790            | 1150.339            | [166]     |
| <i>Cabassous centralis</i>       | 4330     | 33.6             | 916.8    | 4330            | 1444.91             | [38]      |
| <i>Chaetophractus nationi</i>    | 2150     | 35.5             | 559      | 2150            | 723.8778            | [38]      |
| <i>Chaetophractus vellerosus</i> | 1110     | 34.4             | 306.36   | 1110            | 444.5054            | [38]      |
| <i>Chaetophractus villosus</i>   | 4540     | 35.1             | 808.12   | 4540            | 1090.661            | [38]      |
| <i>Dasyurus novemcinctus</i>     | 3510     | 34.5             | 865.215  | 3510            | 1242.45             | [38]      |
| <i>Euphractus sexcinctus</i>     | 8190     | 34.2             | 1236.69  | 8190            | 1831.834            | [38]      |
| <i>Prionomys maximus</i>         | 45190    | 33.6             | 3027.73  | 45190           | 4771.811            | [38]      |
| <i>Tolypeutes matacus</i>        | 1160     | 33               | 209.96   | 1160            | 352.0817            | [38]      |
| <i>Zaedyus pichi</i>             | 1740     | 35.2             | 393.24   | 1740            | 525.2687            | [38]      |
| <i>Choloepus hoffmanni</i>       | 3770     | 34.4             | 603.2    | 3770            | 875.198             | [38]      |
| <i>Cyclopes didactylus</i>       | 240      | 33               | 114.48   | 240             | 191.9714            | [38]      |
| <i>Myrmecophaga tridactyla</i>   | 30600    | 32.52            | 2607.12  | 30600           | 4594.313            | [54]      |
| <i>Tamandua mexicana</i>         | 3977     | 31.95            | 991.5156 | 3976.667        | 1853.331            | [51]      |
| <i>Tamandua tetradactyla</i>     | 3500     | 33.5             | 898.8    | 3500            | 1431.262            | [54]      |
| <i>Antechinomys laniger</i>      | 25.8     | 35.75            | 25.284   | 25.8            | 31.90611            | [167]     |
| <i>Antechinus flavipes</i>       | 46.5     | 35               | 45.105   | 46.5            | 61.50761            | [168]     |
| <i>Antechinus stuartii</i>       | 28.2     | 35.06666667      | 33.78589 | 28.23333        | 45.75579            | [167]     |
| <i>Antechinus swainsoni</i>      | 66.9     | 36.025           | 63       | 66.9            | 77.27176            | [169]     |
| <i>Dasyercus cristicaudata</i>   | 101      | 36.85            | 51.005   | 101             | 57.44462            | [167]     |
| <i>Dasyuroides byrnei</i>        | 91.7     | 35.18333333      | 71.70747 | 91.71429        | 95.94815            | [167]     |
| <i>Dasyurus geoffroyi</i>        | 1354     | 36.2             | 568.68   | 1354            | 684.9998            | [167]     |
| <i>Dasyurus hallucatus</i>       | 558      | 35.9             | 243.009  | 558             | 301.9363            | [167]     |
| <i>Dasyurus maculatus</i>        | 1782     | 36.9             | 588.06   | 1782            | 658.8904            | [167]     |
| <i>Dasyurus viverrinus</i>       | 982      | 35.9             | 396.237  | 982             | 492.3205            | [167]     |
| <i>Ningau i yvonnae</i>          | 11.6     | 34.4             | 15.66    | 11.6            | 22.72149            | [167]     |
| <i>Phascogale tapoatafa</i>      | 157      | 37.4             | 127.17   | 157             | 135.3086            | [167]     |
| <i>Planigale gilesi</i>          | 9.1      | 35.1             | 6.981333 | 9.066667        | 9.422201            | [167]     |
| <i>Planigale maculata</i>        | 10.8     | 34.5             | 12       | 10.8            | 17.23202            | [167]     |

| Species                                | Mass (g) | Temperature (°C) | MR       | Species Average |                     | Reference  |
|----------------------------------------|----------|------------------|----------|-----------------|---------------------|------------|
|                                        |          |                  |          | Mass (g)        | Q <sub>10</sub> SMR |            |
| <i>Planigale tenuirostris</i>          | 7.1      | 34.5             | 11.289   | 7.1             | 16.21102            | [167]      |
| <i>Pseudantechinus macdonnellensis</i> | 43.1     | 34.2             | 27.153   | 43.1            | 40.22009            | [167]      |
| <i>Sarcophilus harrisii</i>            | 5775     | 35.75            | 1325.363 | 5775            | 1672.487            | [167]      |
| <i>Sminthopsis crassicaudata</i>       | 16.4     | 35.16            | 25.09556 | 16.36667        | 33.6602             | [167]      |
| <i>Sminthopsis macroura</i>            | 19.35    | 33.3             | 22.54275 | 19.35           | 36.64742            | [167]      |
| <i>Sminthopsis murina</i>              | 19       | 35               | 21.47    | 19              | 29.27765            | [167]      |
| <i>Myrmecobius fasciatus</i>           | 400      | 32.5             | 142.4    | 400             | 251.4592            | [167]      |
| <i>Caluromys derbianus</i>             | 329      | 35               | 225.0225 | 328.5           | 306.8528            | [167, 169] |
| <i>Chironectes minimus</i>             | 935      | 34.95            | 456.5033 | 934.5           | 625.7388            | [167]      |
| <i>Didelphis marsupialis</i>           | 1165     | 35               | 570.605  | 1164.5          | 778.1077            | [167]      |
| <i>Didelphis virginiana</i>            | 2488     | 34.96666667      | 831.9328 | 2488.333        | 1138.385            | [167]      |
| <i>Lutreolina crassicaudata</i>        | 812      | 35.8             | 406      | 812             | 509.6935            | [167]      |
| <i>Philander opossum</i>               | 751      | 35.8             | 337.95   | 751             | 424.2633            | [167]      |
| <i>Gracilinanus microtarsus</i>        | 13       | 35               | 18.72    | 13              | 25.5276             | [167]      |
| <i>Marmosa robinsoni</i>               | 122      | 34               | 97.6     | 122             | 147.5895            | [167]      |
| <i>Metachirus nudicaudatus</i>         | 336      | 35               | 204.96   | 336             | 279.4945            | [167]      |
| <i>Monodelphis brevicaudata</i>        | 75.5     | 33.65            | 56.51175 | 75.5            | 88.60531            | [167]      |
| <i>Monodelphis domestica</i>           | 104      | 32.6             | 60.008   | 104             | 104.8761            | [167]      |
| <i>Acrobates pygmaeus</i>              | 14       | 34.7             | 15.12    | 14              | 21.26799            | [167]      |
| <i>Burramys parvus</i>                 | 44.3     | 36.1             | 36.769   | 44.3            | 44.75014            | [167, 170] |
| <i>Cercartetus conncinnus</i>          | 18.6     | 34.4             | 22.32    | 18.6            | 32.38465            | [25]       |
| <i>Cercartetus lepidus</i>             | 12.6     | 33.7             | 18.774   | 12.6            | 29.28416            | [25]       |
| <i>Cercartetus nanus</i>               | 70       | 35.6             | 60.2     | 70              | 77.15424            | [167]      |
| <i>Petaurus breviceps</i>              | 127      | 35.86666667      | 89.93978 | 127.3333        | 112.1351            | [167]      |
| <i>Spilocuscus maculatus</i>           | 4250     | 34.7             | 1143.25  | 4250            | 1608.11             | [167]      |
| <i>Trichosurus vulpecula</i>           | 2005     | 36               | 731.6425 | 2004.5          | 899.7082            | [167]      |
| <i>Phascolarctos cinereus</i>          | 4765     | 35.8             | 1034.005 | 4765            | 1298.093            | [167]      |
| <i>Bettongia gaimardi</i>              | 1385     | 35.6             | 641.255  | 1385            | 821.8529            | [131, 167] |
| <i>Bettongia penicillata</i>           | 1018     | 37.2             | 561.427  | 1018            | 609.8379            | [167, 171] |
| <i>Potorous tridactylus</i>            | 976      | 35.85            | 416.4267 | 976             | 520.0876            | [167]      |



| Species                               | Mass (g) | Temperature (°C) | MR       | Species Average |                     | Reference |
|---------------------------------------|----------|------------------|----------|-----------------|---------------------|-----------|
|                                       |          |                  |          | Mass (g)        | Q <sub>10</sub> SMR |           |
| <i>Aepyprimnus rufescens</i>          | 2820     | 36.5             | 1071.6   | 2820            | 1251.367            | [172]     |
| <i>Petauroides volans</i>             | 1141     | 35.4             | 573.923  | 1141            | 750.9261            | [167]     |
| <i>Pseudocheirus occidentalis</i>     | 861      | 36.5             | 408.975  | 861             | 477.583             | [167]     |
| <i>Pseudocheirus peregrinus</i>       | 916      | 37.4             | 430.5198 | 916             | 458.0722            | [173]     |
| <i>Tarsipes rostratus</i>             | 10       | 36.6             | 29       | 10              | 33.5166             | [167]     |
| <i>Lasiorhinus latifrons</i>          | 29917    | 35.3             | 2991.7   | 29917           | 3955.048            | [167]     |
| <i>Notoryctes caurinus</i>            | 34       | 30.8             | 21.42    | 34              | 45.09303            | [167]     |
| <i>Echymipera kalabu</i>              | 695      | 35               | 340.55   | 695             | 464.3923            | [167]     |
| <i>Echymipera rufescens australis</i> | 616      | 34.6             | 301.84   |                 |                     | [167]     |
| <i>Echymipera rufescens rufescens</i> | 1276     | 35.2             | 541.024  | 886.5754        | 556.7894            | [167]     |
| <i>Isoodon auratus</i>                | 428      | 33.8             | 149.8    | 428             | 231.2585            | [167]     |
| <i>Isoodon macrourus</i>              | 1551     | 35.9             | 573.87   | 1551            | 713.0277            | [167]     |
| <i>Isoodon obesulus</i>               | 717      | 33.9             | 222.27   | 717             | 339.6069            | [167]     |
| <i>Macrotis lagotis</i>               | 1294     | 35               | 449.665  | 1294            | 613.1874            | [167]     |
| <i>Perameles gunni</i>                | 837      | 35.2             | 420.174  | 837             | 561.2457            | [167]     |
| <i>Perameles nasuta</i>               | 645      | 36.1             | 316.05   | 645             | 384.6524            | [167]     |
| <i>Ornithorhynchus anatinus</i>       | 693      | 34               | 194.04   | 693             | 293.4248            | [6]       |
| <i>Zaglossus bruijini</i>             | 10300    | 30.8             | 1215.4   | 10300           | 2558.64             | [51]      |
| <i>Tachyglossus aculeatus</i>         | 2725     | 30.7             | 430.55   | 2725            | 915.8064            | [51]      |
| <i>Tachyglossus setosus</i>           | 3580     | 30               | 547.74   | 3580            | 1252.522            | [51]      |
| <b>Birds</b>                          |          |                  |          |                 |                     |           |
| <i>Podargus strigoides</i>            | 341      | 37.8             | 201.19   | 341             | 204.1719            | [174]     |
| <i>Psaltriparus minimus</i>           | 5.5      | 40.2             | 21.78    | 5.5             | 18.52565            | [175]     |
| <i>Strix occidentalis lucida</i>      | 571      | 39.8             | 479.64   | 571             | 420.1553            | [176]     |
| <i>Bubo virginianus</i>               | 1000     | 39.9             | 590      | 1000            | 513.0406            | [176]     |
| <i>Pica nuttalli</i>                  | 151.9    | 39.4             | 263.0817 | 151.9           | 237.3363            | [177]     |
| <i>Pica pica</i>                      | 158.9    | 39.5             | 214.017  | 158.9           | 191.658             | [177]     |
| <i>Chordeiles minor minor</i>         | 72.5     | 37               | 79.75    | 72.5            | 85.83773            | [178]     |
| <i>Otus trichopsis</i>                | 99.8     | 37               | 65.868   | 99.8            | 70.89604            | [179]     |

| Species                        | Mass (g) | Temperature (°C) | MR       | Species Average |                     | Reference |
|--------------------------------|----------|------------------|----------|-----------------|---------------------|-----------|
|                                |          |                  |          | Mass (g)        | Q <sub>10</sub> SMR |           |
| <i>Sephanoides sephanoides</i> | 5.74     | 36.5             | 18.1958  | 5.74            | 20.31854            | [180]     |
| <i>Zosterops lateralis</i>     | 11.78    | 36.9             | 28.6254  | 11.78           | 31.03801            | [181]     |
| <i>Colius striatus</i>         | 51.2     | 36               | 42.5472  | 51.2            | 49.29082            | [182]     |
| <i>Colius colius</i>           | 35.1     | 36.3             | 31.7655  | 35.1            | 35.99701            | [183]     |
| <i>Amadina erythrocephala</i>  | 21.5     | 39.6             | 37.625   | 21.5            | 33.44726            | [184]     |
| <i>Coereba flaveola</i>        | 10       | 40.6             | 38.5     | 10              | 31.79781            | [185]     |
| <i>Sialia mexicana</i>         | 27.5     | 40.4             | 75.62189 | 27.5            | 63.3831             | [186]     |
| <i>Bonasa umbellus</i>         | 644      | 41.5             | 386.4    | 644             | 298.6901            | [187]     |
| <i>Parus atricapillus</i>      | 10.3     | 38.25            | 42.57333 | 10.3            | 41.79755            | [188]     |
| <i>Ptilinopus superbus</i>     | 120.4    | 38.1             | 138.9692 | 120.4           | 137.9506            | [189]     |
| <i>Ptilinopus melanospila</i>  | 94       | 41.75800995      | 90.9602  | 94              | 68.99098            | [190]     |
| <i>Geopelia cuneata</i>        | 39       | 38.1             | 47.61194 | 39              | 47.26298            | [191]     |
| <i>Geopelia placida</i>        | 52       | 38.9             | 63.58209 | 52              | 59.50892            | [191]     |
| <i>Chalcophaps indica</i>      | 124      | 39.3             | 142.0398 | 124             | 129.0857            | [191]     |
| <i>Ocyphaps lophotes</i>       | 187      | 38.7             | 194.3284 | 187             | 184.575             | [191]     |
| <i>Phaps elegans</i>           | 190      | 39               | 221.7413 | 190             | 206.0151            | [191]     |
| <i>Phaps chalcoptera</i>       | 304      | 39.4             | 273.9303 | 304             | 247.1233            | [191]     |
| <i>Leucosarcia melanoleuca</i> | 445      | 38.7             | 303.5323 | 445             | 288.2981            | [191]     |
| <i>Columba leucomela</i>       | 456      | 38.5             | 436.4677 | 456             | 420.7056            | [191]     |
| <i>Phylidonyris melanops</i>   | 18.8     | 40.2             | 52.452   | 18.8            | 44.61465            | [192]     |
| <i>Melithreptus lunatus</i>    | 14.3     | 40.2             | 44.616   | 14.3            | 37.9495             | [192]     |
| <i>Falco sparverius</i>        | 116      | 40.2             | 118.5485 | 116             | 100.8351            | [193]     |
| <i>Buteo lineatus</i>          | 658      | 40.3             | 377.9473 | 658             | 319.1185            | [193]     |
| <i>Pandion haliaetus</i>       | 1495     | 39               | 988.8421 | 1495            | 918.7121            | [193]     |
| <i>Psittirostra bailleui</i>   | 36       | 39.4             | 82.98269 | 36              | 74.86192            | [194]     |
| <i>Himatione sanguinea</i>     | 14.5     | 40.95            | 57.13    | 14.5            | 45.9853             | [195]     |
| <i>Miafra erythrocephalus</i>  | 27.3     | 40.8             | 74.62687 | 27.3            | 60.73544            | [196]     |
| <i>Geophaps plumifera</i>      | 89       | 40.5             | 75.65    | 89              | 62.94194            | [197]     |
| <i>Coturnix pectoralis</i>     | 95.8     | 41.6             | 114.96   | 95.8            | 88.21363            | [198]     |
| <i>Lonchura fuscans</i>        | 9.5      | 38.9             | 17.765   | 9.5             | 16.62694            | [199]     |

| Species                                    | Mass (g) | Temperature (°C) | MR       | Species Average |                     | Reference |
|--------------------------------------------|----------|------------------|----------|-----------------|---------------------|-----------|
|                                            |          |                  |          | Mass (g)        | Q <sub>10</sub> SMR |           |
| <i>Phalacrocorax auritus</i>               | 1330     | 40.2             | 984.2    | 1330            | 837.1414            | [200]     |
| <i>Anhinga anhinga</i>                     | 1040     | 39.1             | 572      | 1040            | 527.538             | [200]     |
| <i>Icterus galbula</i>                     | 37.5     | 40               | 90       | 37.5            | 77.68684            | [201]     |
| <i>Manacus vitellinus</i>                  | 15.5     | 37.9             | 41.69    | 15.5            | 41.99781            | [202]     |
| <i>Pipra mentalis</i>                      | 12.3     | 37.9             | 34.91    | 12.3            | 35.16775            | [202]     |
| <i>Amphispiza bilineata</i>                | 11.6     | 40.772           | 35.94269 | 11.6            | 29.31244            | [203]     |
| <i>Carpodacus mexicanus</i>                | 20.4     | 41.035           | 55.53672 | 20.4            | 44.42419            | [203]     |
| <i>Carpodacus cassinii</i>                 | 27.4     | 40.414           | 60.85254 | 27.4            | 50.95155            | [203]     |
| <i>Agelaius phoeniceus</i>                 | 43.1     | 40.964           | 86.45731 | 43.1            | 69.51993            | [203]     |
| <i>Coturnix coturnix</i>                   | 97.5     | 39.555           | 185.1045 | 97.5            | 165.0968            | [203]     |
| <i>Lophortyx gambelii</i>                  | 126.1    | 41.235           | 135.5104 | 126.1           | 106.8126            | [203]     |
| <i>Pterocles orientalis</i>                | 386.4    | 40.205           | 348.7981 | 386.4           | 296.5718            | [204]     |
| <i>Cardinalis sinuata</i>                  | 32       | 40.9             | 64       | 32              | 51.70496            | [205]     |
| <i>Cardinalis cardinalis</i>               | 41.3     | 40.5             | 81.361   | 41.3            | 67.69358            | [205]     |
| <i>Spinus (Carduelus) tristis</i>          | 12.8     | 39.3             | 54.272   | 12.8            | 49.32238            | [206]     |
| <i>Spinus (Carduelus) pinus</i>            | 13.8     | 38.8             | 62.376   | 13.8            | 58.81113            | [206]     |
| <i>Larus argentatus</i>                    | 1000     | 42               | 860.4179 | 1000            | 641.0906            | [207]     |
| <i>Meliphaga (Lichenostomus) virescens</i> | 25       | 39               | 63.40299 | 25              | 58.90636            | [208]     |
| <i>Lichmera indistincta</i>                | 9        | 39               | 37.25373 | 9               | 34.61165            | [208]     |
| <i>Geococcyx californianus</i>             | 284.7    | 39.8             | 261.924  | 284.7           | 229.4403            | [209]     |
| <i>Spizella passerina</i>                  | 11.9     | 40.8             | 34.51    | 11.9            | 28.08613            | [210]     |
| <i>Ammodramus savannarum</i>               | 13.8     | 38.6             | 31.878   | 13.8            | 30.5016             | [210]     |
| <i>Melospiza georgiana</i>                 | 14.9     | 39.7             | 38.144   | 14.9            | 33.6601             | [210]     |
| <i>Melospiza melodia</i>                   | 19.1     | 40.9             | 45.458   | 19.1            | 36.72506            | [210]     |
| <i>Passerculus sandwichensis</i>           | 15.9     | 39.8             | 40.227   | 15.9            | 35.23807            | [210]     |
| <i>Pooectes gramineus</i>                  | 21.5     | 39.5             | 49.02    | 21.5            | 43.89874            | [210]     |
| <i>Zonotrichia albicollis</i>              | 20.2     | 40.5             | 50.5     | 20.2            | 42.01676            | [210]     |
| <i>Zonotrichia leucophrys</i>              | 26.1     | 40.9             | 61.074   | 26.1            | 49.34107            | [210]     |
| <i>Zonotrichia querula</i>                 | 33.3     | 41.3             | 80.586   | 33.3            | 63.21684            | [210]     |
| <i>Parula americana</i>                    | 7        | 38               | 22.05    | 7               | 22.05               | [210]     |

| Species                          | Mass (g) | Temperature (°C) | MR       | Species Average |                     | Reference  |
|----------------------------------|----------|------------------|----------|-----------------|---------------------|------------|
|                                  |          |                  |          | Mass (g)        | Q <sub>10</sub> SMR |            |
| <i>Dendroica dominica</i>        | 9.8      | 39.7             | 28.812   | 9.8             | 25.4251             | [210]      |
| <i>Dendroica palmarum</i>        | 9.8      | 40.9             | 27.93    | 9.8             | 22.56437            | [210]      |
| <i>Dendroica coronata</i>        | 11.5     | 40.5             | 33.81    | 11.5            | 28.13043            | [210]      |
| <i>Geothlypis trichas</i>        | 10.6     | 41               | 30.846   | 10.6            | 24.73753            | [210]      |
| <i>Wilsonia citrina</i>          | 12       | 41.2             | 38.52    | 12              | 30.44067            | [210]      |
| <i>Protonotaria citrea</i>       | 12.8     | 40.3             | 35.456   | 12.8            | 29.93715            | [210]      |
| <i>Seiurus noveboracensis</i>    | 18.7     | 41.7             | 49.929   | 18.7            | 38.03182            | [210]      |
| <i>Seiurus aurocapillus</i>      | 19       | 41.5             | 43.13    | 19              | 33.33981            | [210]      |
| <i>Empidonax virescens</i>       | 12.3     | 40.5             | 31.734   | 12.3            | 26.40317            | [210]      |
| <i>Contopus virens</i>           | 13.9     | 41.5             | 46.148   | 13.9            | 35.67275            | [210]      |
| <i>Sayornis phoebe</i>           | 21.6     | 41.2             | 61.56    | 21.6            | 48.64818            | [210]      |
| <i>Myiarchus crinitus</i>        | 33.9     | 41.2             | 68.817   | 33.9            | 54.38307            | [210]      |
| <i>Scardafella inca</i>          | 42       | 40.2             | 46.62    | 42              | 39.65407            | [211]      |
| <i>Spheniscus humboldti</i>      | 3870     | 39               | 1699.967 | 3870            | 1579.403            | [212]      |
| <i>Todus mexicanus</i>           | 6.05     | 36.9             | 20.17675 | 6.05            | 21.87729            | [213]      |
| <b>Reptiles</b>                  |          |                  |          |                 |                     |            |
| <i>Aligator mississippiensis</i> | 1287     | 10               | 7.2072   |                 |                     | [214]      |
| <i>Aligator mississippiensis</i> | 1287     | 15               | 13.44915 |                 |                     | [214]      |
| <i>Aligator mississippiensis</i> | 1287     | 20               | 27.09135 |                 |                     | [214]      |
| <i>Aligator mississippiensis</i> | 1287     | 25               | 47.16855 |                 |                     | [214]      |
| <i>Aligator mississippiensis</i> | 1287     | 30               | 58.36545 |                 |                     | [214]      |
| <i>Aligator mississippiensis</i> | 1287     | 35               | 103.7322 | 1287            | 120.0107            | [214]      |
| <i>Sphenodon punctatum</i>       | 430      | 21               | 9.46     |                 |                     | [215]      |
| <i>Sphenodon punctatum</i>       | 430      | 25               | 13.33    | 430             | 42.76173            | [215]      |
| <i>Acabthodactylus boskianus</i> | 15.48    | 10               | 0.8514   |                 |                     | [216]      |
| <i>Acabthodactylus boskianus</i> | 15.48    | 15               | 0.66564  |                 |                     | [216]      |
| <i>Acabthodactylus boskianus</i> | 15.48    | 20               | 1.95048  |                 |                     | [216]      |
| <i>Acabthodactylus boskianus</i> | 11.64    | 25               | 2.25234  |                 |                     | [215, 216] |
| <i>Acabthodactylus boskianus</i> | 11.64    | 30               | 2.619    |                 |                     | [215, 216] |
| <i>Acabthodactylus boskianus</i> | 11.64    | 35               | 3.28248  |                 |                     | [215, 216] |

| Species                            | Mass (g) | Temperature (°C) | MR       | Species Average |                     | Reference |
|------------------------------------|----------|------------------|----------|-----------------|---------------------|-----------|
|                                    |          |                  |          | Mass (g)        | Q <sub>10</sub> SMR |           |
| <i>Acabthodactylus boskianus</i>   | 7.8      | 40               | 2.34     | 12.4217         | 5.572925            | [215]     |
| <i>Acanthodactylus erythrurus</i>  | 9        | 20               | 1.17     |                 |                     | [215]     |
| <i>Acanthodactylus erythrurus</i>  | 9        | 25               | 1.62     |                 |                     | [215]     |
| <i>Acanthodactylus erythrurus</i>  | 9        | 30               | 2.25     |                 |                     | [215]     |
| <i>Acanthodactylus erythrurus</i>  | 9        | 35               | 3.15     | 9               | 4.881291            | [215]     |
| <i>Acanthodactylus opheodurus</i>  | 3.8      | 20               | 0.38     |                 |                     | [217]     |
| <i>Acanthodactylus opheodurus</i>  | 3.8      | 30               | 0.7904   |                 |                     | [217]     |
| <i>Acanthodactylus opheodurus</i>  | 3.8      | 35               | 1.3794   | 3.8             | 1.764679            | [217]     |
| <i>Acanthodactylus pardalis</i>    | 9.7      | 25               | 3.4823   |                 |                     | [215]     |
| <i>Acanthodactylus pardalis</i>    | 9.7      | 30               | 3.88     |                 |                     | [215]     |
| <i>Acanthodactylus pardalis</i>    | 9.7      | 35               | 4.559    |                 |                     | [215]     |
| <i>Acanthodactylus pardalis</i>    | 9.7      | 40               | 6.79     | 9.7             | 7.383813            | [215]     |
| <i>Acanthodactylus schmidti</i>    | 14.5     | 20               | 1.015    |                 |                     | [217]     |
| <i>Acanthodactylus schmidti</i>    | 14.5     | 30               | 2.1895   |                 |                     | [217]     |
| <i>Acanthodactylus schmidti</i>    | 14.5     | 35               | 3.219    | 14.5            | 4.561098            | [217]     |
| <i>Acanthodactylus schreiberi</i>  | 10.9     | 25               | 1.6241   |                 |                     | [215]     |
| <i>Acanthodactylus schreiberi</i>  | 10.9     | 30               | 2.18     |                 |                     | [215]     |
| <i>Acanthodactylus schreiberi</i>  | 10.9     | 35               | 2.7141   |                 |                     | [215]     |
| <i>Acanthodactylus schreiberi</i>  | 10.9     | 40               | 3.0411   | 10.9            | 3.796232            | [215]     |
| <i>Acanthodactylus scutellatus</i> | 6.6      | 25               | 1.056    |                 |                     | [215]     |
| <i>Acanthodactylus scutellatus</i> | 6.6      | 30               | 1.2474   |                 |                     | [215]     |
| <i>Acanthodactylus scutellatus</i> | 6.6      | 35               | 2.376    |                 |                     | [215]     |
| <i>Acanthodactylus scutellatus</i> | 6.6      | 40               | 3.036    | 6.6             | 2.866658            | [215]     |
| <i>Acanthopis praelongus</i>       | 105.5    | 24               | 3.798    |                 |                     | [218]     |
| <i>Acanthopis praelongus</i>       | 105.5    | 27               | 5.3805   |                 |                     | [218]     |
| <i>Acanthopis praelongus</i>       | 105.5    | 30               | 4.9585   |                 |                     | [218]     |
| <i>Acanthopis praelongus</i>       | 105.5    | 33               | 7.385    | 105.5           | 12.19812            | [218]     |
| <i>Acontias meleagris</i>          | 7.3      | 23               | 0.4088   |                 |                     | [215]     |
| <i>Acontias meleagris</i>          | 7.3      | 33               | 0.6789   | 7.3             | 1.28466             | [215]     |
| <i>Acrantophis dumerili</i>        | 2548.5   | 20               | 19.38909 |                 |                     | [219]     |

| Species                        | Mass (g) | Temperature (°C) | MR       | Species Average |                     | Reference       |
|--------------------------------|----------|------------------|----------|-----------------|---------------------|-----------------|
|                                |          |                  |          | Mass (g)        | Q <sub>10</sub> SMR |                 |
| <i>Acrantophis dumerili</i>    | 2548.5   | 30               | 48.2249  |                 |                     | [219]           |
| <i>Acrantophis dumerili</i>    | 2548.5   | 34               | 75.32343 | 2548.5          | 100.7046            | [219]           |
| <i>Acrochordus araduræ</i>     | 1047.7   | 27               | 28.2879  |                 |                     | [218]           |
| <i>Acrochordus araduræ</i>     | 1047.7   | 30               | 24.62095 | 1047.7          | 61.54971            | [218]           |
| <i>Amblyrhynchus cristatus</i> | 747.5    | 25               | 27.28375 |                 |                     | [220, 221]      |
| <i>Amblyrhynchus cristatus</i> | 489      | 30               | 28.362   |                 |                     | [221]           |
| <i>Amblyrhynchus cristatus</i> | 489      | 35               | 48.9     |                 |                     | [221]           |
| <i>Amblyrhynchus cristatus</i> | 489      | 40               | 88.02    | 489             | 64.81586            | [221]           |
| <i>Amphibolurus barbatus</i>   | 373      | 20               | 16.3747  |                 |                     | [215]           |
| <i>Amphibolurus barbatus</i>   | 373      | 30               | 36.5167  |                 |                     | [215]           |
| <i>Amphibolurus barbatus</i>   | 373      | 37               | 52.22    | 373             | 70.23992            | [222]           |
| <i>Amphibolurus nuchalis</i>   | 34.3     | 37               | 6.86     |                 |                     | [223]           |
| <i>Amphibolurus nuchalis</i>   | 24.65    | 40               | 5.94065  | 29.0774         | 6.105519            | [224]           |
| <i>Anarbylus switaki</i>       | 9.48     | 25               | 0.699624 | 9.48            | 2.229119            | [215, 225]      |
| <i>Anguis fragilis</i>         | 13.3     | 20               | 1.463    |                 |                     | [217]           |
| <i>Anguis fragilis</i>         | 12.067   | 30               | 0.710746 |                 |                     | [215, 217]      |
| <i>Anguis fragilis</i>         | 13.3     | 35               | 2.9659   | 12.8756         | 3.445592            | [217]           |
| <i>Anniella pulchra</i>        | 4.9      | 6                | 0.1372   |                 |                     | [226]           |
| <i>Anniella pulchra</i>        | 5.2      | 13               | 0.1508   |                 |                     | [226]           |
| <i>Anniella pulchra</i>        | 4.5      | 20               | 0.340875 |                 |                     | [215, 226]      |
| <i>Anniella pulchra</i>        | 4.8466   | 25               | 0.316483 |                 |                     | [215, 226, 227] |
| <i>Anniella pulchra</i>        | 4.9      | 30               | 0.5684   | 4.864173        | 1.45868             | [226]           |
| <i>Anolis acutus</i>           | 4.3      | 25               | 0.81958  |                 |                     | [215]           |
| <i>Anolis acutus</i>           | 4.3      | 30               | 1.247    | 4.3             | 2.577598            | [215]           |
| <i>Anolis bonariensis</i>      | 12       | 27               | 0.78     |                 |                     | [215]           |
| <i>Anolis bonariensis</i>      | 12       | 33               | 1.692    | 12              | 2.343966            | [215]           |
| <i>Anolis carolinensis</i>     | 4.5      | 20               | 0.495    |                 |                     | [215]           |
| <i>Anolis carolinensis</i>     | 4.5      | 30               | 0.846    | 4.5             | 2.061847            | [215]           |
| <i>Anolis limifrons</i>        | 1.5      | 20               | 0.12     |                 |                     | [215]           |
| <i>Anolis limifrons</i>        | 1.4      | 30               | 0.3388   | 1.449138        | 0.642438            | [215]           |

| Species                         | Mass (g) | Temperature (°C) | MR       | Species Average |                     | Reference  |
|---------------------------------|----------|------------------|----------|-----------------|---------------------|------------|
|                                 |          |                  |          | Mass (g)        | Q <sub>10</sub> SMR |            |
| <i>Antaresia childreni</i>      | 331.7    | 24               | 11.6095  |                 |                     | [218]      |
| <i>Antaresia childreni</i>      | 372.6    | 27               | 17.8848  |                 |                     | [218]      |
| <i>Antaresia childreni</i>      | 331.7    | 30               | 24.2141  |                 |                     | [218]      |
| <i>Antaresia childreni</i>      | 372.5    | 33               | 33.8975  | 351.5321        | 47.38672            | [218]      |
| <i>Antaresia stimsoni</i>       | 360.7    | 24               | 21.2813  |                 |                     | [218]      |
| <i>Antaresia stimsoni</i>       | 360.7    | 27               | 18.3957  |                 |                     | [218]      |
| <i>Antaresia stimsoni</i>       | 349.9    | 30               | 19.9443  |                 |                     | [218]      |
| <i>Antaresia stimsoni</i>       | 371.8    | 33               | 29.3722  | 360.6919        | 51.03765            | [218]      |
| <i>Aspidites melanocephalus</i> | 1027.5   | 24               | 37.70925 |                 |                     | [218]      |
| <i>Aspidites melanocephalus</i> | 1027.5   | 27               | 55.485   |                 |                     | [218]      |
| <i>Aspidites melanocephalus</i> | 1027.5   | 30               | 75.0075  |                 |                     | [218]      |
| <i>Aspidites melanocephalus</i> | 1027.5   | 33               | 103.7775 | 1027.5          | 148.16              | [218]      |
| <i>Blanus cinereus</i>          | 2.4      | 20               | 0.288    |                 |                     | [217]      |
| <i>Blanus cinereus</i>          | 2.4      | 30               | 0.4224   |                 |                     | [217]      |
| <i>Blanus cinereus</i>          | 2.4      | 35               | 0.7944   | 2.4             | 1.086285            | [217]      |
| <i>Boa constrictor</i>          | 5406.25  | 20               | 57.03594 |                 |                     | [215, 219] |
| <i>Boa constrictor</i>          | 7815.5   | 30               | 126.028  |                 |                     | [219]      |
| <i>Boa constrictor</i>          | 7815.5   | 34               | 196.5676 | 6911.992        | 273.6353            | [219]      |
| <i>Bunopus tuberculatus</i>     | 2.5      | 20               | 1.175    |                 |                     | [228]      |
| <i>Bunopus tuberculatus</i>     | 2.5      | 30               | 1.87     |                 |                     | [228]      |
| <i>Bunopus tuberculatus</i>     | 2.5      | 35               | 2.5575   | 2.5             | 4.208466            | [228]      |
| <i>Candoia carinatus</i>        | 521.9    | 20               | 3.831319 |                 |                     | [219]      |
| <i>Candoia carinatus</i>        | 521.9    | 30               | 10.41087 |                 |                     | [219]      |
| <i>Candoia carinatus</i>        | 521.9    | 34               | 16.33647 | 521.9           | 21.1411             | [219]      |
| <i>Chalcides ocellatus</i>      | 22.06    | 5                | 0.4412   |                 |                     | [229, 230] |
| <i>Chalcides ocellatus</i>      | 22.06    | 10               | 0.579075 |                 |                     | [229, 230] |
| <i>Chalcides ocellatus</i>      | 22.06    | 15               | 0.751143 |                 |                     | [229, 230] |
| <i>Chalcides ocellatus</i>      | 22.06    | 20               | 1.020275 |                 |                     | [229, 230] |
| <i>Chalcides ocellatus</i>      | 22.06    | 25               | 1.517728 |                 |                     | [229, 230] |
| <i>Chalcides ocellatus</i>      | 22.06    | 30               | 2.048492 |                 |                     | [215]      |

| Species                          | Mass (g) | Temperature (°C) | MR       | Species Average |                     | Reference  |
|----------------------------------|----------|------------------|----------|-----------------|---------------------|------------|
|                                  |          |                  |          | Mass (g)        | Q <sub>10</sub> SMR |            |
| <i>Chalcides ocellatus</i>       | 22.06    | 33               | 2.07364  |                 |                     | [215]      |
| <i>Chalcides ocellatus</i>       | 22.06    | 35               | 3.125902 | 22.06           | 5.110264            | [229, 230] |
| <i>Chironius quadricarinatus</i> | 61       | 20               | 2.074    | 61              | 10.31911            | [215]      |
| <i>Cnemidophorus murinus</i>     | 85       | 27               | 4.93     |                 |                     | [215]      |
| <i>Cnemidophorus murinus</i>     | 85       | 40               | 15.555   | 85              | 13.07877            | [215]      |
| <i>Cnemidophorus tigris</i>      | 18       | 20               | 1.1196   |                 |                     | [215]      |
| <i>Cnemidophorus tigris</i>      | 18       | 30               | 2.52     |                 |                     | [215]      |
| <i>Cnemidophorus tigris</i>      | 18       | 37               | 4.86     | 18              | 5.338878            | [215]      |
| <i>Coleonyx variegatus</i>       | 3.43     | 25               | 0.502495 | 3.43            | 1.601033            | [215, 225] |
| <i>Coluber constrictor</i>       | 262      | 35               | 16.768   | 262             | 21.90888            | [231]      |
| <i>Corallus caninus</i>          | 556      | 20               | 4.914671 |                 |                     | [219]      |
| <i>Corallus caninus</i>          | 556      | 30               | 14.75437 |                 |                     | [219]      |
| <i>Corallus caninus</i>          | 556      | 34               | 19.2631  | 556             | 27.25901            | [219]      |
| <i>Corallus enhydris</i>         | 802      | 20               | 7.849386 |                 |                     | [219]      |
| <i>Corallus enhydris</i>         | 802      | 30               | 18.79829 |                 |                     | [219]      |
| <i>Corallus enhydris</i>         | 802      | 34               | 27.00474 | 802             | 38.65994            | [219]      |
| <i>Crotalus viridis</i>          | 301      | 35               | 24.08    | 301             | 31.46266            | [215]      |
| <i>Cosymbotus platyurus</i>      | 3.5      | 27               | 0.35     | 3.5             | 0.933063            | [215]      |
| <i>Crotalus viridis</i>          | 301      | 35               | 19.264   | 301             | 25.17013            | [231]      |
| <i>Crotaphytus collaris</i>      | 30       | 20               | 2.4      |                 |                     | [215]      |
| <i>Crotaphytus collaris</i>      | 30       | 30               | 5.4      |                 |                     | [215]      |
| <i>Crotaphytus collaris</i>      | 30       | 37               | 8.4      | 30              | 10.6507             | [215]      |
| <i>Ctenotus labillardieri</i>    | 2.8      | 20               | 0.19992  | 2.8             | 0.994695            | [215]      |
| <i>Cyclagras gigas</i>           | 2680     | 20               | 85.76    | 2680            | 426.6957            | [215]      |
| <i>Diadophis punctatus</i>       | 5        | 20               | 0.28     | 5               | 1.39313             | [215]      |
| <i>Diadophis punctatus</i>       | 4.4      | 30               | 0.5808   | 4.4             | 1.185033            | [215]      |
| <i>Diplometopon zarudnyi</i>     | 6.34     | 10               | 0.2536   |                 |                     | [216]      |
| <i>Diplometopon zarudnyi</i>     | 6.34     | 15               | 0.317    |                 |                     | [216]      |
| <i>Diplometopon zarudnyi</i>     | 6.34     | 20               | 0.5706   |                 |                     | [216]      |
| <i>Diplometopon zarudnyi</i>     | 6.34     | 25               | 0.70374  |                 |                     | [216]      |



| Species                           | Mass (g) | Temperature (°C) | MR       | Species Average |                     | Reference  |
|-----------------------------------|----------|------------------|----------|-----------------|---------------------|------------|
|                                   |          |                  |          | Mass (g)        | Q <sub>10</sub> SMR |            |
| <i>Diplometopon zarudnyi</i>      | 6.34     | 30               | 0.70374  |                 |                     | [216]      |
| <i>Diplometopon zarudnyi</i>      | 6.34     | 35               | 0.97002  | 6.34            | 2.108185            | [216]      |
| <i>Dipsas albifrons</i>           | 22       | 20               | 0.792    | 22              | 3.940567            | [215]      |
| <i>Dipsosaurus dorsalis</i>       | 40.36    | 20               | 1.6144   |                 |                     | [215]      |
| <i>Dipsosaurus dorsalis</i>       | 40.36    | 25               | 1.87674  |                 |                     | [215, 232] |
| <i>Dipsosaurus dorsalis</i>       | 40.36    | 30               | 2.8252   |                 |                     | [215, 232] |
| <i>Dipsosaurus dorsalis</i>       | 40.36    | 35               | 6.054    |                 |                     | [215, 232] |
| <i>Dipsosaurus dorsalis</i>       | 40.36    | 37               | 4.96428  |                 |                     | [215]      |
| <i>Dipsosaurus dorsalis</i>       | 40.36    | 40               | 7.2648   |                 |                     | [215, 232] |
| <i>Dipsosaurus dorsalis</i>       | 40.36    | 45               | 10.09    | 40.36           | 6.29241             | [232]      |
| <i>Egernia cunninghami</i>        | 261      | 20               | 8.874    |                 |                     | [215]      |
| <i>Egernia cunninghami</i>        | 261      | 30               | 22.707   | 261             | 45.22809            | [215]      |
| <i>Elaphe guttata</i>             | 800      | 25               | 90.4     | 800             | 288.0296            | [215]      |
| <i>Epicrates cenchria</i>         | 416      | 20               | 5.0342   |                 |                     | [219]      |
| <i>Epicrates cenchria</i>         | 416      | 30               | 12.15859 |                 |                     | [219]      |
| <i>Epicrates cenchria</i>         | 416      | 34               | 19.38448 | 416             | 25.8158             | [219]      |
| <i>Eryx colubrinus</i>            | 85.85    | 20               | 1.272384 |                 |                     | [219]      |
| <i>Eryx colubrinus</i>            | 85.85    | 30               | 3.345878 |                 |                     | [219]      |
| <i>Eryx colubrinus</i>            | 85.85    | 34               | 4.811108 | 85.85           | 6.671972            | [219]      |
| <i>Eumeces fasciatus</i>          | 7        | 30               | 1.68     | 7               | 3.427781            | [215]      |
| <i>Eumeces inexpectatus</i>       | 9.6      | 30               | 1.4688   | 9.6             | 2.99686             | [215]      |
| <i>Eumeces obsoletus</i>          | 30       | 20               | 1.5      |                 |                     | [215]      |
| <i>Eumeces obsoletus</i>          | 30       | 30               | 5.1      |                 |                     | [215]      |
| <i>Eumeces obsoletus</i>          | 30       | 37               | 10.2     | 30              | 9.531706            | [215]      |
| <i>Eunectes murinus</i>           | 1130     | 20               | 23.73    | 1130            | 118.0677            | [215]      |
| <i>Eunectes notaeus</i>           | 14400    | 20               | 216      | 14400           | 1074.7              | [215]      |
| <i>Garthia gaudichaudi</i>        | 0.805    | 25               | 0.076958 |                 |                     | [233]      |
| <i>Garthia gaudichaudi</i>        | 0.805    | 35               | 0.192395 | 0.805           | 0.248272            | [233]      |
| <i>Gekko gecko</i>                | 61.5     | 30               | 5.9286   | 61.5            | 12.09639            | [215]      |
| <i>Gerrhonotus multicarinatus</i> | 29       | 20               | 1.6472   |                 |                     | [215]      |

| Species                           | Mass (g) | Temperature (°C) | MR      | Species Average |                     | Reference  |
|-----------------------------------|----------|------------------|---------|-----------------|---------------------|------------|
|                                   |          |                  |         | Mass (g)        | Q <sub>10</sub> SMR |            |
| <i>Gerrhonotus multicarinatus</i> | 29       | 30               | 4.93    | 29              | 9.07957             | [215]      |
| <i>Gonotodes antillensis</i>      | 1.8      | 27               | 0.198   |                 |                     | [215]      |
| <i>Gonotodes antillensis</i>      | 1.8      | 34               | 0.2988  | 1.8             | 0.474646            | [215]      |
| <i>Helicops modestus</i>          | 196      | 20               | 6.86    |                 |                     | [215]      |
| <i>Helicops modestus</i>          | 196      | 25               | 7.84    |                 |                     | [215]      |
| <i>Helicops modestus</i>          | 196      | 30               | 10.78   | 196             | 26.56776            | [215]      |
| <i>Hemidactylus frenatus</i>      | 4.4      | 20               | 0.2596  |                 |                     | [215]      |
| <i>Hemidactylus frenatus</i>      | 4.4      | 26               | 0.6864  |                 |                     | [215]      |
| <i>Hemidactylus frenatus</i>      | 2        | 27               | 0.21    |                 |                     | [215]      |
| <i>Hemidactylus frenatus</i>      | 4.4      | 30               | 0.9196  | 3.612826        | 1.283539            | [215]      |
| <i>Iguana iguana</i>              | 795      | 20               | 31.8    |                 |                     | [215]      |
| <i>Iguana iguana</i>              | 795      | 30               | 64.395  |                 |                     | [215]      |
| <i>Iguana iguana</i>              | 795      | 37               | 119.25  | 795             | 139.4214            | [215]      |
| <i>Klauberina riversiana</i>      | 19       | 20               | 0.665   |                 |                     | [215, 234] |
| <i>Klauberina riversiana</i>      | 19       | 25               | 1.102   |                 |                     | [215, 234] |
| <i>Klauberina riversiana</i>      | 19       | 30               | 1.995   |                 |                     | [215, 234] |
| <i>Klauberina riversiana</i>      | 19       | 35               | 0.38    | 19              | 2.201246            | [215, 234] |
| <i>L. sicula</i>                  | 9        | 20               | 0.4896  |                 |                     | [215]      |
| <i>L. sicula</i>                  | 7        | 30               | 0.98    | 7.937254        | 2.207               | [215]      |
| <i>L. trilineata</i>              | 71       | 20               | 1.6259  |                 |                     | [215]      |
| <i>L. trilineata</i>              | 54       | 30               | 6.696   | 61.9193         | 10.51292            | [215]      |
| <i>Lacerta agilis</i>             | 8.4      | 20               | 1.5204  |                 |                     | [217]      |
| <i>Lacerta agilis</i>             | 8.4      | 30               | 3.024   |                 |                     | [217]      |
| <i>Lacerta agilis</i>             | 8.4      | 35               | 4.0908  | 8.4             | 6.295178            | [217]      |
| <i>Lacerta viridis</i>            | 20       | 30               | 2.2     |                 |                     | [215]      |
| <i>Lacerta viridis</i>            | 31       | 20               | 0.837   | 24.8998         | 4.323572            | [215]      |
| <i>Lacerta vivipara</i>           | 3.95     | 30               | 0.93615 |                 |                     | [215, 229] |
| <i>Lacerta vivipara</i>           | 3.19     | 5                | 0.10208 |                 |                     | [235]      |
| <i>Lacerta vivipara</i>           | 3.19     | 10               | 0.20416 |                 |                     | [235]      |
| <i>Lacerta vivipara</i>           | 3.19     | 15               | 0.28391 |                 |                     | [235]      |

| Species                         | Mass (g) | Temperature (°C) | MR       | Species Average |                     | Reference  |
|---------------------------------|----------|------------------|----------|-----------------|---------------------|------------|
|                                 |          |                  |          | Mass (g)        | Q <sub>10</sub> SMR |            |
| <i>Lacerta vivipara</i>         | 3.19     | 20               | 0.55825  |                 |                     | [235]      |
| <i>Lacerta vivipara</i>         | 3.19     | 25               | 0.8294   |                 |                     | [235]      |
| <i>Lacerta vivipara</i>         | 3.19     | 30               | 1.06865  |                 |                     | [235]      |
| <i>Lacerta vivipara</i>         | 3.19     | 35               | 1.595    |                 |                     | [235]      |
| <i>Lacerta vivipara</i>         | 3.19     | 5                | 0.163647 |                 |                     | [229]      |
| <i>Lacerta vivipara</i>         | 3.19     | 10               | 0.271469 |                 |                     | [229]      |
| <i>Lacerta vivipara</i>         | 3.19     | 15               | 0.393327 |                 |                     | [229]      |
| <i>Lacerta vivipara</i>         | 3.19     | 20               | 0.43065  |                 |                     | [229]      |
| <i>Lacerta vivipara</i>         | 3.19     | 25               | 0.78155  |                 |                     | [229]      |
| <i>Lacerta vivipara</i>         | 3.9      | 35               | 2.184    | 3.285894        | 2.472949            | [229]      |
| <i>Lampropeltis getulus</i>     | 1217     | 26               | 34.076   | 1217            | 99.31258            | [215]      |
| <i>Lampropeltis miliaris</i>    | 401      | 20               | 13.634   |                 |                     | [215]      |
| <i>Lampropeltis miliaris</i>    | 401      | 25               | 19.248   |                 |                     | [215]      |
| <i>Lampropeltis miliaris</i>    | 401      | 30               | 31.278   | 401             | 64.27143            | [215]      |
| <i>Leimadophis poecilogyrus</i> | 42       | 20               | 1.68     | 42              | 8.358778            | [215]      |
| <i>Lepidophyma gaigeae</i>      | 5        | 15               | 0.135    |                 |                     | [234]      |
| <i>Lepidophyma gaigeae</i>      | 5        | 20               | 0.3075   |                 |                     | [215, 234] |
| <i>Lepidophyma gaigeae</i>      | 5        | 25               | 0.39     |                 |                     | [215, 234] |
| <i>Lepidophyma gaigeae</i>      | 5        | 30               | 0.65     | 5               | 1.275235            | [215, 234] |
| <i>Lepidophyma smithi</i>       | 25       | 20               | 0.7725   |                 |                     | [215, 234] |
| <i>Lepidophyma smithi</i>       | 25       | 25               | 1.25     |                 |                     | [215, 234] |
| <i>Lepidophyma smithi</i>       | 25       | 30               | 1.75     | 25              | 3.79505             | [215, 234] |
| <i>Liasis fuscus</i>            | 1306.9   | 24               | 18.2966  |                 |                     | [218]      |
| <i>Liasis fuscus</i>            | 1306.9   | 27               | 23.26282 |                 |                     | [218]      |
| <i>Liasis fuscus</i>            | 1306.9   | 30               | 28.7518  |                 |                     | [218]      |
| <i>Liasis fuscus</i>            | 1306.9   | 33               | 52.276   | 1306.9          | 65.95888            | [218]      |
| <i>Liasis olivaceus</i>         | 3000.7   | 24               | 45.0105  |                 |                     | [218]      |
| <i>Liasis olivaceus</i>         | 3000.7   | 27               | 75.0175  |                 |                     | [218]      |
| <i>Liasis olivaceus</i>         | 3323.2   | 30               | 109.6656 |                 |                     | [218]      |
| <i>Liasis olivaceus</i>         | 3000.7   | 33               | 102.0238 | 3078.265        | 182.8459            | [218]      |

| Species                          | Mass (g) | Temperature (°C) | MR       | Species Average |                     | Reference |
|----------------------------------|----------|------------------|----------|-----------------|---------------------|-----------|
|                                  |          |                  |          | Mass (g)        | Q <sub>10</sub> SMR |           |
| <i>Lichanura roseofusca</i>      | 314      | 32               | 21.98    |                 |                     | [215]     |
| <i>Lichanura roseofusca</i>      | 314      | 32               | 204.1    | 314             | 114.3439            | [231]     |
| <i>Lichanura trivirgata</i>      | 182      | 20               | 2.379161 |                 |                     | [219]     |
| <i>Lichanura trivirgata</i>      | 182      | 30               | 6.059368 |                 |                     | [219]     |
| <i>Lichanura trivirgata</i>      | 182      | 34               | 10.08765 | 182             | 12.8236             | [219]     |
| <i>Morelia spilota spilota</i>   | 1516.5   | 24               | 42.462   |                 |                     | [218]     |
| <i>Morelia spilota spilota</i>   | 1516.5   | 27               | 60.66    |                 |                     | [218]     |
| <i>Morelia spilota spilota</i>   | 1516.5   | 30               | 80.3745  |                 |                     | [218]     |
| <i>Morelia spilota spilota</i>   | 1516.5   | 33               | 78.858   |                 |                     | [218]     |
| <i>Morelia spilota variegata</i> | 1938.4   | 24               | 50.3984  |                 |                     | [218]     |
| <i>Morelia spilota variegata</i> | 2170     | 27               | 62.93    |                 |                     | [218]     |
| <i>Morelia spilota variegata</i> | 2173.5   | 30               | 56.511   |                 |                     | [218]     |
| <i>Morelia spilota variegata</i> | 2828.7   | 33               | 124.4628 |                 |                     | [218]     |
| <i>Morelia spilota</i>           | 1065.5   | 20               | 12.42428 |                 |                     | [219]     |
| <i>Morelia spilota</i>           | 1065.5   | 30               | 38.37135 |                 |                     | [219]     |
| <i>Morelia spilota</i>           | 1065.5   | 34               | 52.15962 | 1591.102        | 124.856             | [219]     |
| <i>Masticodryas bifossatus</i>   | 735      | 20               | 31.605   | 735             | 157.2495            | [215]     |
| <i>Masticophis flagellum</i>     | 262      | 35               | 222.7    | 262             | 290.9773            | [231]     |
| <i>Natrix maura</i>              | 22.5     | 5                | 0.144632 |                 |                     | [236]     |
| <i>Natrix maura</i>              | 22.5     | 10               | 6.384478 |                 |                     | [236]     |
| <i>Natrix maura</i>              | 22.5     | 15               | 0.402904 |                 |                     | [236]     |
| <i>Natrix maura</i>              | 22.5     | 20               | 0.661176 |                 |                     | [236]     |
| <i>Natrix maura</i>              | 22.5     | 25               | 1.033087 |                 |                     | [236]     |
| <i>Natrix maura</i>              | 22.5     | 30               | 1.446322 |                 |                     | [236]     |
| <i>Natrix maura</i>              | 22.5     | 35               | 2.789335 | 22.5            | 4.993188            | [236]     |
| <i>Natrix natrix</i>             | 84       | 20               | 7.56     |                 |                     | [215]     |
| <i>Natrix natrix helretica</i>   | 82.5     | 5                | 0.32849  |                 |                     | [236]     |
| <i>Natrix natrix helretica</i>   | 82.5     | 10               | 1.231836 |                 |                     | [236]     |
| <i>Natrix natrix helretica</i>   | 82.5     | 15               | 1.806693 |                 |                     | [236]     |
| <i>Natrix natrix helretica</i>   | 82.5     | 20               | 3.558638 |                 |                     | [236]     |

| Species                         | Mass (g) | Temperature (°C) | MR       | Species Average |                     | Reference       |
|---------------------------------|----------|------------------|----------|-----------------|---------------------|-----------------|
|                                 |          |                  |          | Mass (g)        | Q <sub>10</sub> SMR |                 |
| <i>Natrix natrix helretica</i>  | 82.5     | 25               | 5.748569 |                 |                     | [236]           |
| <i>Natrix natrix helretica</i>  | 82.5     | 30               | 11.2234  |                 |                     | [236]           |
| <i>Natrix natrix helretica</i>  | 82.5     | 35               | 16.15074 |                 |                     | [236]           |
| <i>Natrix natrix persa</i>      | 37.5     | 5                | 0.257616 |                 |                     | [236]           |
| <i>Natrix natrix persa</i>      | 37.5     | 10               | 0.348539 |                 |                     | [236]           |
| <i>Natrix natrix persa</i>      | 37.5     | 15               | 0.651616 |                 |                     | [236]           |
| <i>Natrix natrix persa</i>      | 37.5     | 20               | 1.182002 |                 |                     | [236]           |
| <i>Natrix natrix persa</i>      | 37.5     | 25               | 1.818464 |                 |                     | [236]           |
| <i>Natrix natrix persa</i>      | 37.5     | 30               | 2.727696 |                 |                     | [236]           |
| <i>Natrix natrix persa</i>      | 37.5     | 35               | 5.152315 | 57.17134        | 10.01764            | [236]           |
| <i>Nerodia rhombifera</i>       | 238      | 20               | 14.28    |                 |                     | [215]           |
| <i>Nerodia rhombifera</i>       | 238      | 30               | 22.61    | 238             | 57.25099            | [215]           |
| <i>Ophisaurus ventralis</i>     | 32.185   | 25               | 1.242341 | 32.185          | 3.958307            | [215, 226, 227] |
| <i>Oxyrhopus trigeminus</i>     | 98       | 20               | 3.43     | 98              | 17.06584            | [215]           |
| <i>Pelamis platurus</i>         | 116      | 30               | 6.96     | 116             | 14.20081            | [215]           |
| <i>Philodryas olfersii</i>      | 176      | 20               | 6.864    | 176             | 34.15158            | [215]           |
| <i>Philodryas patagoniensis</i> | 388      | 20               | 19.788   | 388             | 98.45446            | [215]           |
| <i>Philodryas serra</i>         | 135      | 20               | 4.725    | 135             | 23.50906            | [215]           |
| <i>Phrynosoma cornutum</i>      | 35       | 25               | 3.36     |                 |                     | [215]           |
| <i>Phrynosoma cornutum</i>      | 35       | 35               | 5.81     | 35              | 9.014912            | [215]           |
| <i>Phrynosoma douglassi</i>     | 28       | 25               | 3.22     |                 |                     | [215]           |
| <i>Phrynosoma douglassi</i>     | 28       | 35               | 4.788    | 28              | 8.011407            | [215]           |
| <i>Phrynosoma m'calli</i>       | 16       | 20               | 1.12     |                 |                     | [215]           |
| <i>Phrynosoma m'calli</i>       | 16       | 30               | 2.72     |                 |                     | [215]           |
| <i>Phrynosoma m'calli</i>       | 16       | 37               | 4.4      | 16              | 5.298626            | [215]           |
| <i>Physignathus lesueurii</i>   | 504      | 20               | 16.5816  |                 |                     | [215]           |
| <i>Physignathus lesueurii</i>   | 504      | 30               | 40.32    |                 |                     | [215]           |
| <i>Physignathus lesueurii</i>   | 504      | 37               | 70.56    | 504             | 80.59695            | [215]           |
| <i>Pituophis melanoleucus</i>   | 548      | 20               | 10.412   |                 |                     | [215]           |
| <i>Pituophis melanoleucus</i>   | 622      | 20               | 23.014   |                 |                     | [215]           |

| Species                             | Mass (g) | Temperature (°C) | MR      | Species Average |                     | Reference |
|-------------------------------------|----------|------------------|---------|-----------------|---------------------|-----------|
|                                     |          |                  |         | Mass (g)        | Q <sub>10</sub> SMR |           |
| <i>Pituophis melanoleucus</i>       | 548      | 30               | 38.36   | 571.6328        | 77.43285            | [215]     |
| <i>Pitupophis catenifer affinis</i> | 548      | 10               | 8.768   |                 |                     | [237]     |
| <i>Pitupophis catenifer affinis</i> | 548      | 20               | 10.96   |                 |                     | [237]     |
| <i>Pitupophis catenifer affinis</i> | 548      | 30               | 21.92   |                 |                     | [237]     |
| <i>Pitupophis catenifer affinis</i> | 548      | 40               | 75.076  | 548             | 63.53775            | [237]     |
| <i>Podarcis hispanica</i>           | 3.43     | 5                | 0.04459 |                 |                     | [235]     |
| <i>Podarcis hispanica</i>           | 3.43     | 10               | 0.0686  |                 |                     | [235]     |
| <i>Podarcis hispanica</i>           | 3.43     | 15               | 0.11662 |                 |                     | [235]     |
| <i>Podarcis hispanica</i>           | 3.43     | 20               | 0.3087  |                 |                     | [235]     |
| <i>Podarcis hispanica</i>           | 3.43     | 25               | 0.53165 |                 |                     | [235]     |
| <i>Podarcis hispanica</i>           | 3.43     | 30               | 0.79233 |                 |                     | [235]     |
| <i>Podarcis hispanica</i>           | 3.43     | 35               | 0.9604  |                 |                     | [235]     |
| <i>Podarcis hispanica</i>           | 3.6      | 20               | 0.576   |                 |                     | [217]     |
| <i>Podarcis hispanica</i>           | 3.6      | 30               | 1.332   |                 |                     | [217]     |
| <i>Podarcis hispanica</i>           | 3.6      | 35               | 2.106   | 3.480139        | 1.533823            | [217]     |
| <i>Podarcis lilfordi brauni</i>     | 7.4      | 20               | 0.5402  |                 |                     | [217]     |
| <i>Podarcis lilfordi brauni</i>     | 7.4      | 30               | 2.516   |                 |                     | [217]     |
| <i>Podarcis lilfordi lilfordi</i>   | 8.3      | 20               | 0.7055  |                 |                     | [217]     |
| <i>Podarcis lilfordi lilfordi</i>   | 8.3      | 30               | 1.7015  | 7.837091        | 3.600951            | [217]     |
| <i>Podarcis muralis</i>             | 5.5      | 20               | 0.946   |                 |                     | [217]     |
| <i>Podarcis muralis</i>             | 5.5      | 30               | 2.5795  |                 |                     | [217]     |
| <i>Podarcis muralis</i>             | 5.5      | 35               | 2.3485  | 5.5             | 4.236083            | [217]     |
| <i>Psammodromus algirus</i>         | 5.2      | 20               | 0.6396  |                 |                     | [217]     |
| <i>Psammodromus algirus</i>         | 5.2      | 30               | 1.7888  |                 |                     | [217]     |
| <i>Psammodromus algirus</i>         | 5.2      | 35               | 2.626   | 5.2             | 3.415705            | [217]     |
| <i>Pseudonaja nuchalis</i>          | 214.1    | 24               | 7.9217  |                 |                     | [218]     |
| <i>Pseudonaja nuchalis</i>          | 214.1    | 27               | 11.1332 |                 |                     | [218]     |
| <i>Pseudonaja nuchalis</i>          | 214.1    | 30               | 14.3447 |                 |                     | [218]     |
| <i>Pseudonaja nuchalis</i>          | 214.1    | 33               | 15.8434 | 214.1           | 27.75031            | [218]     |
| <i>Ptyodactylus hasselquistii</i>   | 8.5      | 20               | 0.51    |                 |                     | [228]     |

| Species                           | Mass (g) | Temperature (°C) | MR       | Species Average |                     | Reference  |
|-----------------------------------|----------|------------------|----------|-----------------|---------------------|------------|
|                                   |          |                  |          | Mass (g)        | Q <sub>10</sub> SMR |            |
| <i>Ptyodactylus hasselquistii</i> | 8.5      | 30               | 1.241    | 8.5             | 2.534776            | [228]      |
| <i>Python curtis</i>              | 2373.5   | 20               | 17.72535 |                 |                     | [219]      |
| <i>Python curtis</i>              | 2373.5   | 30               | 45.74423 |                 |                     | [219]      |
| <i>Python curtis</i>              | 2373.5   | 34               | 65.58768 | 2373.5          | 91.70244            | [219]      |
| <i>Python molurus</i>             | 29777.25 | 20               | 147.8181 |                 |                     | [215, 219] |
| <i>Python molurus</i>             | 23162.25 | 30               | 363.6473 |                 |                     | [215, 219] |
| <i>Python molurus</i>             | 33954.5  | 34               | 675.1985 | 28610.2         | 807.3768            | [219]      |
| <i>Python regius</i>              | 787      | 20               | 6.873619 |                 |                     | [219]      |
| <i>Python regius</i>              | 883.5    | 30               | 20.25686 |                 |                     | [219]      |
| <i>Python regius</i>              | 830.5    | 34               | 28.43973 | 832.7353        | 38.57958            | [219]      |
| <i>Python reticulatus</i>         | 14326    | 20               | 128.8228 |                 |                     | [219]      |
| <i>Python reticulatus</i>         | 14326    | 30               | 334.5076 |                 |                     | [219]      |
| <i>Python reticulatus</i>         | 14326    | 34               | 486.8621 | 14326           | 672.5604            | [219]      |
| <i>Python sebae</i>               | 16140    | 20               | 112.4057 |                 |                     | [219]      |
| <i>Python sebae</i>               | 16140    | 30               | 286.6705 |                 |                     | [219]      |
| <i>Python sebae</i>               | 16140    | 34               | 394.2839 | 16140           | 569.0144            | [219]      |
| <i>Salvadora hexalepis</i>        | 65       | 20               | 2.99     |                 |                     | [215]      |
| <i>Salvadora hexalepis</i>        | 65       | 30               | 6.955    | 65              | 14.52957            | [215]      |
| <i>Sauromalus hispidus</i>        | 574      | 20               | 10.2746  |                 |                     | [215]      |
| <i>Sauromalus hispidus</i>        | 574      | 30               | 29.848   |                 |                     | [215]      |
| <i>Sauromalus hispidus</i>        | 574      | 37               | 50.4546  |                 |                     | [215]      |
| <i>Sauromalus hispidus</i>        | 574      | 15               | 7.175    |                 |                     | [238]      |
| <i>Sauromalus hispidus</i>        | 574      | 20               | 10.906   |                 |                     | [238]      |
| <i>Sauromalus hispidus</i>        | 574      | 25               | 21.238   |                 |                     | [238]      |
| <i>Sauromalus hispidus</i>        | 574      | 30               | 29.274   |                 |                     | [238]      |
| <i>Sauromalus hispidus</i>        | 574      | 35               | 43.624   |                 |                     | [238]      |
| <i>Sauromalus hispidus</i>        | 574      | 40               | 68.88    | 574             | 57.52413            | [238]      |
| <i>Sauromalus obesus</i>          | 150      | 20               | 4.35     |                 |                     | [215]      |
| <i>Sauromalus obesus</i>          | 150      | 30               | 10.8     | 150             | 21.83862            | [215]      |
| <i>Sceloporus graciosus</i>       | 5        | 25               | 0.44     |                 |                     | [215]      |

| Species                        | Mass (g) | Temperature (°C) | MR       | Species Average |                     | Reference       |
|--------------------------------|----------|------------------|----------|-----------------|---------------------|-----------------|
|                                |          |                  |          | Mass (g)        | Q <sub>10</sub> SMR |                 |
| <i>Sceloporus graciosus</i>    | 5        | 30               | 0.82     |                 |                     | [215]           |
| <i>Sceloporus graciosus</i>    | 5        | 37               | 1.75     | 5               | 1.649415            | [215]           |
| <i>Sceloporus occidentalis</i> | 10.105   | 10               | 0.76798  |                 |                     | [239]           |
| <i>Sceloporus occidentalis</i> | 10.105   | 16               | 1.722903 |                 |                     | [239]           |
| <i>Sceloporus occidentalis</i> | 10.105   | 20               | 17.5827  |                 |                     | [240-242]       |
| <i>Sceloporus occidentalis</i> | 10.105   | 25               | 1.09134  |                 |                     | [215, 241, 242] |
| <i>Sceloporus occidentalis</i> | 10.105   | 30               | 49.5145  |                 |                     | [240-242]       |
| <i>Sceloporus occidentalis</i> | 10.105   | 31               | 2.273625 |                 |                     | [243]           |
| <i>Sceloporus occidentalis</i> | 10.105   | 35               | 28.95083 |                 |                     | [240-242]       |
| <i>Sceloporus occidentalis</i> | 10.105   | 40               | 81.8505  | 10.105          | 21.04958            | [239-242]       |
| <i>Sceloporus olivaceus</i>    | 24       | 20               | 1.5792   |                 |                     | [215]           |
| <i>Sceloporus olivaceus</i>    | 21       | 25               | 3.507    |                 |                     | [215]           |
| <i>Sceloporus olivaceus</i>    | 13       | 30               | 3.939    | 18.71219        | 8.902697            | [215]           |
| <i>Sceloporus undulatus</i>    | 3.8      | 20               | 0.1482   |                 |                     | [215]           |
| <i>Sceloporus undulatus</i>    | 3.8      | 25               | 0.4484   |                 |                     | [215]           |
| <i>Sceloporus undulatus</i>    | 3.8      | 30               | 1.0146   |                 |                     | [215]           |
| <i>Sceloporus undulatus</i>    | 3.8      | 35               | 1.349    | 3.8             | 1.400204            | [215]           |
| <i>Sceloporus variabilis</i>   | 12.215   | 10               | 2.015475 |                 |                     | [239]           |
| <i>Sceloporus variabilis</i>   | 12.215   | 16               | 3.78665  |                 |                     | [239]           |
| <i>Sceloporus variabilis</i>   | 12.215   | 35               | 21.80378 | 12.215          | 26.56546            | [239]           |
| <i>Scelotes gronovii</i>       | 1.1      | 23               | 0.1804   |                 |                     | [215]           |
| <i>Scelotes gronovii</i>       | 1.1      | 33               | 0.2497   | 1.1             | 0.517556            | [215]           |
| <i>Scincella lateralis</i>     | 1        | 20               | 0.12     |                 |                     | [215]           |
| <i>Scincella lateralis</i>     | 1        | 30               | 0.31     | 1               | 0.614526            | [215]           |
| <i>Scinus mitranus</i>         | 14.6     | 10               | 0.3942   |                 |                     | [216]           |
| <i>Scinus mitranus</i>         | 14.6     | 15               | 0.4818   |                 |                     | [216]           |
| <i>Scinus mitranus</i>         | 14.6     | 20               | 0.7592   |                 |                     | [216]           |
| <i>Scinus mitranus</i>         | 14.6     | 25               | 1.5038   |                 |                     | [216]           |
| <i>Scinus mitranus</i>         | 14.6     | 30               | 1.5914   |                 |                     | [216]           |
| <i>Scinus mitranus</i>         | 14.6     | 35               | 2.19     | 14.6            | 3.799939            | [216]           |



| Species                               | Mass (g) | Temperature (°C) | MR       | Species Average |                     | Reference  |
|---------------------------------------|----------|------------------|----------|-----------------|---------------------|------------|
|                                       |          |                  |          | Mass (g)        | Q <sub>10</sub> SMR |            |
| <i>Sibynomorphis mikanii</i>          | 11       | 20               | 1.353    | 11              | 6.731802            | [215]      |
| <i>Spalerosophis cliffordi</i>        | 300      | 15               | 15.6     |                 |                     | [244]      |
| <i>Spalerosophis cliffordi</i>        | 300      | 20               | 21.6     |                 |                     | [244]      |
| <i>Spalerosophis cliffordi</i>        | 300      | 25               | 29.7     |                 |                     | [244]      |
| <i>Spalerosophis cliffordi</i>        | 300      | 30               | 40.5     |                 |                     | [244]      |
| <i>Spalerosophis cliffordi</i>        | 300      | 35               | 57       |                 |                     | [244]      |
| <i>Spalerosophis cliffordi</i>        | 300      | 37               | 76.5     |                 |                     | [244]      |
| <i>Spalerosophis cliffordi</i>        | 300      | 40               | 127.5    |                 |                     | [244]      |
| <i>Spalerosophis cliffordi</i>        | 351      | 30               | 47.736   |                 |                     | [215]      |
| <i>Spalerosophis cliffordi</i>        | 300      | 41.8             | 171      | 305.2794        | 97.59638            | [244]      |
| <i>Sphaerodactylus beattyi</i>        | 0.4      | 25               | 0.06     |                 |                     | [215]      |
| <i>Sphaerodactylus beattyi</i>        | 0.4      | 30               | 0.09     | 0.4             | 0.187363            | [215]      |
| <i>Sphaerodactylus cinereus</i>       | 0.4      | 27               | 0.04     | 0.4             | 0.106636            | [215]      |
| <i>Sphaerodactylus macrolepis</i>     | 0.5      | 30               | 0.13     | 0.5             | 0.265245            | [215]      |
| <i>Sphenops sepsoides</i>             | 7.4      | 30               | 0.5846   | 7.4             | 1.192786            | [215]      |
| <i>Storeria dekayi</i>                | 7.2      | 20               | 0.63     |                 |                     | [215]      |
| <i>Storeria dekayi</i>                | 7.2      | 30               | 1.1664   | 7.2             | 2.731258            | [215]      |
| <i>Tarentola mauritanica</i>          | 6.6      | 20               | 0.4422   |                 |                     | [217]      |
| <i>Tarentola mauritanica</i>          | 6.6      | 30               | 0.8316   |                 |                     | [217]      |
| <i>Tarentola mauritanica</i>          | 6.6      | 35               | 1.2012   | 6.6             | 1.802775            | [217]      |
| <i>Thamnodyastes strigatus</i>        | 55       | 20               | 2.255    | 55              | 11.21967            | [215]      |
| <i>Thamnophis butleri</i>             | 19.02    | 25               | 1.170681 | 19.02           | 3.729986            | [215, 227] |
| <i>Thamnophis proximus</i>            | 31       | 20               | 2.325    |                 |                     | [215]      |
| <i>Thamnophis proximus</i>            | 31       | 30               | 4.65     | 31              | 10.47627            | [215]      |
| <i>Thamnophis sirtalis</i>            | 43       | 20               | 2.365    |                 |                     | [215]      |
| <i>Thamnophis sirtalis</i>            | 200      | 29               | 6.6      | 92.73618        | 13.16172            | [215]      |
| <i>Thamnophis sirtalis parietalis</i> | 25       | 5                | 0.425    |                 |                     | [245]      |
| <i>Thamnophis sirtalis parietalis</i> | 25       | 10               | 1.275    |                 |                     | [245]      |
| <i>Thamnophis sirtalis parietalis</i> | 25       | 15               | 1.275    |                 |                     | [245]      |
| <i>Thamnophis sirtalis parietalis</i> | 25       | 20               | 1.85     |                 |                     | [245]      |

| Species                               | Mass (g) | Temperature (°C) | MR       | Species Average |                     | Reference  |
|---------------------------------------|----------|------------------|----------|-----------------|---------------------|------------|
|                                       |          |                  |          | Mass (g)        | Q <sub>10</sub> SMR |            |
| <i>Thamnophis sirtalis parietalis</i> | 25       | 25               | 2.75     |                 |                     | [245]      |
| <i>Thamnophis sirtalis parietalis</i> | 25       | 30               | 4        |                 |                     | [245]      |
| <i>Thamnophis sirtalis sirtalis</i>   | 37.5     | 10               | 0.73125  |                 |                     | [245]      |
| <i>Thamnophis sirtalis sirtalis</i>   | 37.5     | 15               | 1.05     |                 |                     | [245]      |
| <i>Thamnophis sirtalis sirtalis</i>   | 37.5     | 20               | 1.5      |                 |                     | [245]      |
| <i>Thamnophis sirtalis sirtalis</i>   | 37.5     | 25               | 2.5875   |                 |                     | [245]      |
| <i>Thamnophis sirtalis sirtalis</i>   | 37.5     | 30               | 3.6      | 30.05948        | 8.864815            | [245]      |
| <i>Tiliqua rugosa</i>                 | 508.6    | 35               | 73.2384  | 508.6           | 95.69247            | [246]      |
| <i>Tiliqua scincoides</i>             | 493      | 20               | 13.311   |                 |                     | [215]      |
| <i>Tiliqua scincoides</i>             | 493      | 30               | 44.37    | 493             | 77.43168            | [215]      |
| <i>Trachydosaurus rugosus</i>         | 461      | 20               | 13.83    |                 |                     | [215]      |
| <i>Trachydosaurus rugosus</i>         | 461      | 30               | 41.49    |                 |                     | [215]      |
| <i>Trachydosaurus rugosus</i>         | 461      | 37               | 64.54    | 461             | 74.35011            | [215]      |
| <i>Trogonophis weigmanni</i>          | 4.985    | 25               | 0.192172 | 4.985           | 0.612291            | [215, 227] |
| <i>Uromastyx microlepis</i>           | 289.84   | 20               | 3.507064 |                 |                     | [247]      |
| <i>Uromastyx microlepis</i>           | 247.94   | 25               | 7.428282 |                 |                     | [247]      |
| <i>Uromastyx microlepis</i>           | 269.04   | 30               | 13.15606 |                 |                     | [247]      |
| <i>Uromastyx microlepis</i>           | 248.146  | 35               | 17.43474 |                 |                     | [247]      |
| <i>Uromastyx microlepis</i>           | 291.546  | 40               | 32.53653 | 268.6255        | 23.30519            | [247]      |
| <i>Uta mearnsi</i>                    | 14       | 20               | 0.546    |                 |                     | [215]      |
| <i>Uta mearnsi</i>                    | 14       | 30               | 2.38     |                 |                     | [215]      |
| <i>Uta mearnsi</i>                    | 14       | 37               | 3.5      | 14              | 3.695694            | [215]      |
| <i>Uta stansburiana</i>               | 3.625    | 20               | 2.86375  |                 |                     | [215, 240] |
| <i>Uta stansburiana</i>               | 3.625    | 30               | 4.948125 |                 |                     | [215, 240] |
| <i>Uta stansburiana</i>               | 3.625    | 35               | 10.3675  |                 |                     | [215, 240] |
| <i>Uta stansburiana</i>               | 3.625    | 37               | 1.0875   |                 |                     | [215]      |
| <i>Uta stansburiana</i>               | 3.625    | 40               | 17.58125 | 3.625           | 8.063033            | [240]      |
| <i>Varanus albigularis</i>            | 963      | 35               | 149.265  | 963             | 195.028             | [215]      |
| <i>Varanus bengalensis</i>            | 3440     | 20               | 92.88    |                 |                     | [215]      |
| <i>Varanus bengalensis</i>            | 3440     | 30               | 175.44   | 3440            | 406.7186            | [215]      |

| Species                       | Mass (g) | Temperature (°C) | MR       | Species Average |                     | Reference |
|-------------------------------|----------|------------------|----------|-----------------|---------------------|-----------|
|                               |          |                  |          | Mass (g)        | Q <sub>10</sub> SMR |           |
| <i>Varanus exanthematicus</i> | 3836     | 25               | 1893.623 |                 |                     | [248]     |
| <i>Varanus exanthematicus</i> | 3836     | 30               | 2969.545 |                 |                     | [248]     |
| <i>Varanus exanthematicus</i> | 3836     | 35               | 6729.422 | 3836            | 6850.004            | [248]     |
| <i>Varanus giganteus</i>      | 2496     | 25.9             | 107.0784 |                 |                     | [249]     |
| <i>Varanus giganteus</i>      | 2502     | 34.7             | 238.4406 | 2498.998        | 317.4175            | [249]     |
| <i>Varanus gilleni</i>        | 27.5     | 37               | 5.3625   | 27.5            | 5.862465            | [250]     |
| <i>Varanus gouldii</i>        | 76.9     | 19.7             | 2.93758  |                 |                     | [251]     |
| <i>Varanus gouldi</i>         | 674      | 20               | 16.176   |                 |                     | [215]     |
| <i>Varanus gouldi</i>         | 674      | 30               | 51.898   |                 |                     | [215]     |
| <i>Varanus gouldii</i>        | 169      | 30.7             | 11.4582  |                 |                     | [251]     |
| <i>Varanus gouldii</i>        | 1086     | 35               | 97.74    |                 |                     | [246]     |
| <i>Varanus gouldii</i>        | 154.6    | 35.5             | 19.04672 |                 |                     | [251]     |
| <i>Varanus gouldi</i>         | 674      | 37               | 75.488   |                 |                     | [215]     |
| <i>Varanus gouldii</i>        | 179.1    | 40               | 30.03507 |                 |                     | [251]     |
| <i>Varanus gouldii</i>        | 674      | 15               | 6.066    |                 |                     | [238]     |
| <i>Varanus gouldii</i>        | 674      | 20               | 18.198   |                 |                     | [238]     |
| <i>Varanus gouldii</i>        | 674      | 25               | 35.722   |                 |                     | [238]     |
| <i>Varanus gouldii</i>        | 674      | 30               | 51.898   |                 |                     | [238]     |
| <i>Varanus gouldii</i>        | 674      | 35               | 67.4     |                 |                     | [238]     |
| <i>Varanus gouldii</i>        | 674      | 40               | 80.88    | 443.0171        | 58.44781            | [238]     |
| <i>Varanus mertensi</i>       | 904      | 35               | 70.512   | 904             | 92.13019            | [246]     |
| <i>Varanus panoptes</i>       | 2005     | 20.5             | 54.937   |                 |                     | [251]     |
| <i>Varanus panoptes</i>       | 2003     | 30.6             | 178.0667 |                 |                     | [251]     |
| <i>Varanus panoptes</i>       | 931      | 35               | 122.892  |                 |                     | [246]     |
| <i>Varanus panoptes</i>       | 1427     | 35.3             | 171.24   |                 |                     | [251]     |
| <i>Varanus panoptes</i>       | 799      | 40               | 164.3543 | 1336.421        | 212.4759            | [251]     |
| <i>Varanus varius</i>         | 4410     | 30               | 220.5    | 4410            | 449.8963            | [215]     |
| <i>Varnus rosenbergi</i>      | 1269.3   | 35               | 167.5476 | 1269.3          | 218.9158            | [246]     |
| <i>Vipera berus</i>           | 63       | 25               | 5.67     | 63              | 18.06557            | [215]     |
| <i>Xantusia henshawi</i>      | 3.5      | 15               | 0.1295   |                 |                     | [234]     |

| Species                        | Mass (g) | Temperature (°C) | MR       | Species Average |                     | Reference  |
|--------------------------------|----------|------------------|----------|-----------------|---------------------|------------|
|                                |          |                  |          | Mass (g)        | Q <sub>10</sub> SMR |            |
| <i>Xantusia henshawi</i>       | 3.5      | 20               | 0.2485   |                 |                     | [215, 234] |
| <i>Xantusia henshawi</i>       | 3.5      | 25               | 0.3675   |                 |                     | [215, 234] |
| <i>Xantusia henshawi</i>       | 3.5      | 30               | 0.518    | 3.5             | 1.113902            | [215, 234] |
| <i>Xantusia vigilis</i>        | 1.5      | 30               | 0.2589   |                 |                     | [215, 234] |
| <i>Xantusia vigilis</i>        | 1.5      | 25               | 0.168    | 1.5             | 0.531749            | [215, 234] |
| <i>Xenodon guentheri</i>       | 50       | 20               | 1.75     | 50              | 8.70706             | [215]      |
| <i>Xenodon merremii</i>        | 502      | 20               | 21.586   | 502             | 107.4003            | [215]      |
| <i>Xenodon neuwiedii</i>       | 53       | 20               | 1.961    | 53              | 9.756883            | [215]      |
| <i>Chelydra serpentina</i>     | 3473     | 10               | 11.63455 |                 |                     | [252]      |
| <i>Chelydra serpentina</i>     | 3473     | 20               | 39.9395  |                 |                     | [252]      |
| <i>Chelydra serpentina</i>     | 3473     | 30               | 125.028  | 3473            | 192.7022            | [252]      |
| <i>Pseudemys scripta</i>       | 305      | 10               | 1.159    |                 |                     | [253]      |
| <i>Pseudemys scripta</i>       | 305      | 20               | 3.3245   |                 |                     | [253]      |
| <i>Pseudemys scripta</i>       | 305      | 30               | 9.5465   |                 |                     | [253]      |
| <i>Pseudemys scripta</i>       | 305      | 40               | 27.4195  | 305             | 17.95548            | [253]      |
| <i>Terrapene ornata ornata</i> | 354      | 10               | 0.2832   |                 |                     | [253]      |
| <i>Terrapene ornata ornata</i> | 354      | 20               | 3.2922   |                 |                     | [253]      |
| <i>Terrapene ornata ornata</i> | 354      | 30               | 5.2746   |                 |                     | [253]      |
| <i>Terrapene ornata ornata</i> | 354      | 40               | 32.2848  | 354             | 11.30994            | [253]      |
| <b>Fish</b>                    |          |                  |          |                 |                     |            |
| <i>Acipenser transmontanus</i> | 900      | 10               | 27.72    |                 |                     | [254]      |
| <i>Acipenser transmontanus</i> | 900      | 15               | 49.14    |                 |                     | [254]      |
| <i>Acipenser transmontanus</i> | 950      | 15               | 50.54    | 916.3672        | 140.4107            | [254]      |
| <i>Ameiurus nebulosus</i>      | 74.9     | 25               | 4.87599  |                 |                     | [254]      |
| <i>Ameiurus nebulosus</i>      | 74.9     | 25               | 5.19057  |                 |                     | [254]      |
| <i>Ameiurus nebulosus</i>      | 74.9     | 25               | 5.243    |                 |                     | [254]      |
| <i>Ameiurus nebulosus</i>      | 74.9     | 25               | 5.29543  |                 |                     | [254]      |
| <i>Ameiurus nebulosus</i>      | 115      | 30               | 8.6135   |                 |                     | [254]      |
| <i>Ameiurus nebulosus</i>      | 116      | 10               | 1.624    |                 |                     | [254]      |

| Species                   | Mass (g) | Temperature (°C) | MR     | Species Average |                     | Reference |
|---------------------------|----------|------------------|--------|-----------------|---------------------|-----------|
|                           |          |                  |        | Mass (g)        | Q <sub>10</sub> SMR |           |
| <i>Ameiurus nebulosus</i> | 147      | 20               | 6.8943 | 93.33772        | 10.43388            | [254]     |
| <i>Anguilla anguilla</i>  | 80       | 25               | 2.912  |                 |                     | [254]     |
| <i>Anguilla anguilla</i>  | 80       | 25               | 3.192  |                 |                     | [254]     |
| <i>Anguilla anguilla</i>  | 80       | 25               | 3.248  |                 |                     | [254]     |
| <i>Anguilla anguilla</i>  | 80       | 25               | 3.64   |                 |                     | [254]     |
| <i>Anguilla anguilla</i>  | 80       | 25               | 3.696  |                 |                     | [254]     |
| <i>Anguilla anguilla</i>  | 80       | 25               | 3.864  |                 |                     | [254]     |
| <i>Anguilla anguilla</i>  | 80       | 25               | 4.032  |                 |                     | [254]     |
| <i>Anguilla anguilla</i>  | 80       | 25               | 4.088  |                 |                     | [254]     |
| <i>Anguilla anguilla</i>  | 80       | 25               | 4.2    |                 |                     | [254]     |
| <i>Anguilla anguilla</i>  | 80       | 25               | 4.2    |                 |                     | [254]     |
| <i>Anguilla anguilla</i>  | 80       | 25               | 4.256  |                 |                     | [254]     |
| <i>Anguilla anguilla</i>  | 80       | 25               | 4.312  |                 |                     | [254]     |
| <i>Anguilla anguilla</i>  | 80       | 25               | 4.816  |                 |                     | [254]     |
| <i>Anguilla anguilla</i>  | 80       | 25               | 4.816  |                 |                     | [254]     |
| <i>Anguilla anguilla</i>  | 80       | 25               | 4.984  |                 |                     | [254]     |
| <i>Anguilla anguilla</i>  | 80       | 25               | 5.096  |                 |                     | [254]     |
| <i>Anguilla anguilla</i>  | 80       | 25               | 5.656  | 80              | 7.875761            | [254]     |
| <i>Anguilla australis</i> | 700      | 20               | 10.78  | 700             | 26.47665            | [254]     |
| <i>Anguilla japonica</i>  | 325      | 13               | 4.7775 |                 |                     | [254]     |
| <i>Anguilla japonica</i>  | 325      | 14.5             | 4.55   |                 |                     | [254]     |
| <i>Anguilla japonica</i>  | 325      | 14.5             | 5.005  |                 |                     | [254]     |
| <i>Anguilla japonica</i>  | 325      | 14.5             | 6.5975 |                 |                     | [254]     |
| <i>Anguilla japonica</i>  | 325      | 15               | 5.915  |                 |                     | [254]     |
| <i>Anguilla japonica</i>  | 325      | 15               | 7.0525 |                 |                     | [254]     |
| <i>Anguilla japonica</i>  | 325      | 16               | 8.19   |                 |                     | [254]     |
| <i>Anguilla japonica</i>  | 325      | 17               | 8.19   |                 |                     | [254]     |
| <i>Anguilla japonica</i>  | 325      | 17               | 9.555  |                 |                     | [254]     |
| <i>Anguilla japonica</i>  | 325      | 18               | 8.4175 |                 |                     | [254]     |
| <i>Anguilla japonica</i>  | 325      | 18               | 9.3275 |                 |                     | [254]     |

| Species                      | Mass (g) | Temperature (°C) | MR      | Species Average |                     | Reference |
|------------------------------|----------|------------------|---------|-----------------|---------------------|-----------|
|                              |          |                  |         | Mass (g)        | Q <sub>10</sub> SMR |           |
| <i>Anguilla japonica</i>     | 325      | 18.5             | 7.0525  |                 |                     | [254]     |
| <i>Anguilla japonica</i>     | 325      | 19               | 7.5075  |                 |                     | [254]     |
| <i>Anguilla japonica</i>     | 325      | 19               | 9.555   |                 |                     | [254]     |
| <i>Anguilla japonica</i>     | 325      | 19               | 11.83   |                 |                     | [254]     |
| <i>Anguilla japonica</i>     | 325      | 19.5             | 9.3275  |                 |                     | [254]     |
| <i>Anguilla japonica</i>     | 325      | 19.5             | 9.555   |                 |                     | [254]     |
| <i>Anguilla japonica</i>     | 325      | 20               | 8.4175  |                 |                     | [254]     |
| <i>Anguilla japonica</i>     | 325      | 20               | 10.01   |                 |                     | [254]     |
| <i>Anguilla japonica</i>     | 325      | 20               | 10.2375 |                 |                     | [254]     |
| <i>Anguilla japonica</i>     | 325      | 20               | 13.195  |                 |                     | [254]     |
| <i>Anguilla japonica</i>     | 325      | 20               | 13.65   |                 |                     | [254]     |
| <i>Anguilla japonica</i>     | 325      | 24               | 18.8825 |                 |                     | [254]     |
| <i>Anguilla japonica</i>     | 325      | 25               | 16.835  |                 |                     | [254]     |
| <i>Anguilla japonica</i>     | 325      | 26               | 26.1625 |                 |                     | [254]     |
| <i>Anguilla japonica</i>     | 325      | 27.5             | 26.6175 |                 |                     | [254]     |
| <i>Anguilla japonica</i>     | 325      | 29               | 24.57   |                 |                     | [254]     |
| <i>Anguilla japonica</i>     | 325      | 29               | 31.1675 |                 |                     | [254]     |
| <i>Anguilla japonica</i>     | 325      | 30               | 28.665  | 325             | 26.24907            | [254]     |
| <i>Anguilla rostrata</i>     | 214      | 15               | 4.1944  |                 |                     | [254]     |
| <i>Anguilla rostrata</i>     | 315      | 15               | 4.6305  | 259.6344        | 13.89294            | [254]     |
| <i>Arapaima gigas</i>        | 2300     | 28               | 40.25   |                 |                     | [254]     |
| <i>Arapaima gigas</i>        | 2300     | 28               | 46.69   |                 |                     | [254]     |
| <i>Arapaima gigas</i>        | 2300     | 28               | 48.3    | 2300            | 74.03686            | [254]     |
| <i>Balistes carolinensis</i> | 320      | 17.5             | 18.816  |                 |                     | [254]     |
| <i>Balistes carolinensis</i> | 395      | 17.9             | 25.991  |                 |                     | [254]     |
| <i>Balistes carolinensis</i> | 700      | 17.9             | 52.43   | 445.6033        | 80.96677            | [254]     |
| <i>Callionymus lyra</i>      | 48.7     | 11               | 1.84086 |                 |                     | [254]     |
| <i>Callionymus lyra</i>      | 85.7     | 11               | 3.23946 |                 |                     | [254]     |
| <i>Callionymus lyra</i>      | 105      | 11.5             | 1.5435  |                 |                     | [254]     |
| <i>Callionymus lyra</i>      | 105      | 11.5             | 1.9845  |                 |                     | [254]     |

| Species                        | Mass (g) | Temperature (°C) | MR     | Species Average |                     | Reference |
|--------------------------------|----------|------------------|--------|-----------------|---------------------|-----------|
|                                |          |                  |        | Mass (g)        | Q <sub>10</sub> SMR |           |
| <i>Callionymus lyra</i>        | 105      | 11.5             | 2.4255 |                 |                     | [254]     |
| <i>Callionymus lyra</i>        | 105      | 11.5             | 2.646  |                 |                     | [254]     |
| <i>Callionymus lyra</i>        | 105      | 11.5             | 2.793  |                 |                     | [254]     |
| <i>Callionymus lyra</i>        | 105      | 11.5             | 3.087  |                 |                     | [254]     |
| <i>Callionymus lyra</i>        | 105      | 11.5             | 3.822  |                 |                     | [254]     |
| <i>Callionymus lyra</i>        | 105      | 11.5             | 4.116  |                 |                     | [254]     |
| <i>Callionymus lyra</i>        | 105      | 11.5             | 4.3365 |                 |                     | [254]     |
| <i>Callionymus lyra</i>        | 105      | 11.5             | 4.998  |                 |                     | [254]     |
| <i>Callionymus lyra</i>        | 105      | 11.5             | 5.2185 |                 |                     | [254]     |
| <i>Callionymus lyra</i>        | 105      | 11.5             | 5.5125 |                 |                     | [254]     |
| <i>Callionymus lyra</i>        | 105      | 11.5             | 5.586  |                 |                     | [254]     |
| <i>Callionymus lyra</i>        | 105      | 11.5             | 5.9535 |                 |                     | [254]     |
| <i>Callionymus lyra</i>        | 105      | 11.5             | 6.3945 |                 |                     | [254]     |
| <i>Callionymus lyra</i>        | 105      | 11.5             | 6.5415 |                 |                     | [254]     |
| <i>Callionymus lyra</i>        | 105      | 11.5             | 6.615  |                 |                     | [254]     |
| <i>Callionymus lyra</i>        | 105      | 11.5             | 6.6885 |                 |                     | [254]     |
| <i>Callionymus lyra</i>        | 105      | 11.5             | 6.8355 |                 |                     | [254]     |
| <i>Callionymus lyra</i>        | 105      | 11.5             | 6.9825 |                 |                     | [254]     |
| <i>Callionymus lyra</i>        | 105      | 11.5             | 7.056  | 100.6577        | 15.76756            | [254]     |
| <i>Catostomus commersonii</i>  | 70       | 15               | 3.871  |                 |                     | [254]     |
| <i>Catostomus commersonii</i>  | 72       | 10               | 1.764  |                 |                     | [254]     |
| <i>Catostomus commersonii</i>  | 95       | 20               | 7.3815 |                 |                     | [254]     |
| <i>Catostomus commersonii</i>  | 100      | 10               | 2.45   |                 |                     | [254]     |
| <i>Catostomus commersonii</i>  | 100      | 10               | 2.8    |                 |                     | [254]     |
| <i>Catostomus commersonii</i>  | 100      | 15               | 5.6    |                 |                     | [254]     |
| <i>Catostomus commersonii</i>  | 100      | 20               | 5.25   |                 |                     | [254]     |
| <i>Catostomus commersonii</i>  | 100      | 20               | 7.7    | 91.20513        | 12.89285            | [254]     |
| <i>Chaenocephalus aceratus</i> | 1130     | 2                | 14.238 |                 |                     | [254]     |
| <i>Chaenocephalus aceratus</i> | 1130     | 2                | 17.402 |                 |                     | [254]     |
| <i>Chaenocephalus aceratus</i> | 1130     | 2                | 19.775 |                 |                     | [254]     |

| Species                        | Mass (g) | Temperature (°C) | MR       | Species Average |                     | Reference |
|--------------------------------|----------|------------------|----------|-----------------|---------------------|-----------|
|                                |          |                  |          | Mass (g)        | Q <sub>10</sub> SMR |           |
| <i>Chaenocephalus aceratus</i> | 1130     | 2                | 22.939   |                 |                     | [254]     |
| <i>Chaenocephalus aceratus</i> | 1130     | 4                | 27.685   |                 |                     | [254]     |
| <i>Chaenocephalus aceratus</i> | 1130     | 4                | 31.64    |                 |                     | [254]     |
| <i>Chaenocephalus aceratus</i> | 1130     | 4                | 34.804   |                 |                     | [254]     |
| <i>Chaenocephalus aceratus</i> | 1130     | 4                | 37.177   |                 |                     | [254]     |
| <i>Chaenocephalus aceratus</i> | 1130     | 4                | 38.759   |                 |                     | [254]     |
| <i>Chaenocephalus aceratus</i> | 1130     | 4                | 39.55    |                 |                     | [254]     |
| <i>Chaenocephalus aceratus</i> | 1130     | 6                | 24.521   |                 |                     | [254]     |
| <i>Chaenocephalus aceratus</i> | 1130     | 6                | 30.849   |                 |                     | [254]     |
| <i>Chaenocephalus aceratus</i> | 1130     | 6                | 31.64    |                 |                     | [254]     |
| <i>Chaenocephalus aceratus</i> | 1130     | 6                | 33.222   |                 |                     | [254]     |
| <i>Chaenocephalus aceratus</i> | 1130     | 6                | 38.759   |                 |                     | [254]     |
| <i>Chaenocephalus aceratus</i> | 1130     | 6                | 51.415   |                 |                     | [254]     |
| <i>Chaenocephalus aceratus</i> | 1130     | 8                | 29.267   |                 |                     | [254]     |
| <i>Chaenocephalus aceratus</i> | 1130     | 8                | 30.849   |                 |                     | [254]     |
| <i>Chaenocephalus aceratus</i> | 1130     | 10               | 29.267   |                 |                     | [254]     |
| <i>Chaenocephalus aceratus</i> | 1130     | 10               | 30.849   |                 |                     | [254]     |
| <i>Chaenocephalus aceratus</i> | 1130     | 10               | 35.595   | 1130            | 151.3969            | [254]     |
| <i>Channa punctata</i>         | 8.33     | 20               | 0.448987 |                 |                     | [254]     |
| <i>Channa punctata</i>         | 8.33     | 31               | 0.798847 |                 |                     | [254]     |
| <i>Channa punctata</i>         | 12.33    | 20               | 0.552384 |                 |                     | [254]     |
| <i>Channa punctata</i>         | 12.66    | 31               | 1.010268 |                 |                     | [254]     |
| <i>Channa punctata</i>         | 23.66    | 31               | 1.457456 |                 |                     | [254]     |
| <i>Channa punctata</i>         | 26.66    | 20               | 1.007748 |                 |                     | [254]     |
| <i>Channa punctata</i>         | 33.33    | 20               | 1.143219 |                 |                     | [254]     |
| <i>Channa punctata</i>         | 33.66    | 31               | 1.861398 |                 |                     | [254]     |
| <i>Channa punctata</i>         | 43       | 31               | 2.0769   |                 |                     | [254]     |
| <i>Channa punctata</i>         | 45.66    | 20               | 1.470252 |                 |                     | [254]     |
| <i>Channa punctata</i>         | 53.66    | 31               | 2.141034 |                 |                     | [254]     |
| <i>Channa punctata</i>         | 55       | 20               | 1.7325   |                 |                     | [254]     |



| Species                        | Mass (g) | Temperature (°C) | MR       | Species Average |                     | Reference |
|--------------------------------|----------|------------------|----------|-----------------|---------------------|-----------|
|                                |          |                  |          | Mass (g)        | Q <sub>10</sub> SMR |           |
| <i>Channa punctata</i>         | 62       | 20               | 1.953    |                 |                     | [254]     |
| <i>Channa punctata</i>         | 67       | 31               | 2.4857   |                 |                     | [254]     |
| <i>Channa punctata</i>         | 75.33    | 31               | 2.742012 |                 |                     | [254]     |
| <i>Channa punctata</i>         | 75.66    | 20               | 2.38329  |                 |                     | [254]     |
| <i>Channa punctata</i>         | 81       | 31               | 2.9484   |                 |                     | [254]     |
| <i>Channa punctata</i>         | 85.66    | 20               | 2.638328 |                 |                     | [254]     |
| <i>Channa punctata</i>         | 93.66    | 20               | 2.884728 |                 |                     | [254]     |
| <i>Channa punctata</i>         | 97       | 31               | 3.4629   |                 |                     | [254]     |
| <i>Channa punctata</i>         | 102.33   | 20               | 3.151764 |                 |                     | [254]     |
| <i>Channa punctata</i>         | 105      | 31               | 3.675    |                 |                     | [254]     |
| <i>Channa punctata</i>         | 115      | 31               | 4.025    |                 |                     | [254]     |
| <i>Channa punctata</i>         | 125.66   | 31               | 4.3981   |                 |                     | [254]     |
| <i>Channa punctata</i>         | 134      | 31               | 4.69     | 48.48243        | 3.513215            | [254]     |
| <i>Chiloscyllium plagiosum</i> | 880      | 23               | 28.952   |                 |                     | [254]     |
| <i>Chiloscyllium plagiosum</i> | 880      | 23               | 35.112   |                 |                     | [254]     |
| <i>Chiloscyllium plagiosum</i> | 880      | 23               | 39.424   | 880             | 72.36054            | [254]     |
| <i>Cirrhinus cirrhosus</i>     | 3.4      | 20               | 0.14518  |                 |                     | [254]     |
| <i>Cirrhinus cirrhosus</i>     | 3.4      | 30               | 0.20468  |                 |                     | [254]     |
| <i>Cirrhinus cirrhosus</i>     | 4.24     | 30.5             | 0.706384 |                 |                     | [254]     |
| <i>Cirrhinus cirrhosus</i>     | 4.94     | 30.5             | 0.750386 |                 |                     | [254]     |
| <i>Cirrhinus cirrhosus</i>     | 11.3     | 30.5             | 1.61364  |                 |                     | [254]     |
| <i>Cirrhinus cirrhosus</i>     | 19.78    | 30.5             | 2.547664 |                 |                     | [254]     |
| <i>Cirrhinus cirrhosus</i>     | 23.32    | 30.5             | 2.873024 |                 |                     | [254]     |
| <i>Cirrhinus cirrhosus</i>     | 31.8     | 30.5             | 3.69516  |                 |                     | [254]     |
| <i>Cirrhinus cirrhosus</i>     | 48.76    | 30.5             | 5.29046  |                 |                     | [254]     |
| <i>Cirrhinus cirrhosus</i>     | 63.6     | 30.5             | 6.49992  |                 |                     | [254]     |
| <i>Cirrhinus cirrhosus</i>     | 95       | 30.5             | 9.044    |                 |                     | [254]     |
| <i>Cirrhinus cirrhosus</i>     | 122      | 30.5             | 11.102   |                 |                     | [254]     |
| <i>Cirrhinus cirrhosus</i>     | 155      | 30.5             | 13.5625  |                 |                     | [254]     |
| <i>Cirrhinus cirrhosus</i>     | 180      | 30.5             | 15.498   | 25.13837        | 3.86044             | [254]     |

| Species                       | Mass (g) | Temperature (°C) | MR       | Species Average |                     | Reference |
|-------------------------------|----------|------------------|----------|-----------------|---------------------|-----------|
|                               |          |                  |          | Mass (g)        | Q <sub>10</sub> SMR |           |
| <i>Clarias batrachus</i>      | 15.3     | 26               | 0.94248  |                 |                     | [254]     |
| <i>Clarias batrachus</i>      | 27.25    | 26               | 2.384375 |                 |                     | [254]     |
| <i>Clarias batrachus</i>      | 32.7     | 26               | 2.22033  |                 |                     | [254]     |
| <i>Clarias batrachus</i>      | 42.5     | 26               | 4.13525  |                 |                     | [254]     |
| <i>Clarias batrachus</i>      | 54       | 26               | 4.347    |                 |                     | [254]     |
| <i>Clarias batrachus</i>      | 64.4     | 26               | 4.59816  |                 |                     | [254]     |
| <i>Clarias batrachus</i>      | 77       | 26               | 2.9645   |                 |                     | [254]     |
| <i>Clarias batrachus</i>      | 82       | 26               | 4.7642   |                 |                     | [254]     |
| <i>Clarias batrachus</i>      | 95.7     | 26               | 5.42619  | 47.44229        | 5.756228            | [254]     |
| <i>Cyclothone acclinidens</i> | 0.23     | 3                | 0.007406 |                 |                     | [254]     |
| <i>Cyclothone acclinidens</i> | 0.23     | 3                | 0.00805  |                 |                     | [254]     |
| <i>Cyclothone acclinidens</i> | 0.52     | 3                | 0.01092  |                 |                     | [254]     |
| <i>Cyclothone acclinidens</i> | 0.52     | 3                | 0.013104 |                 |                     | [254]     |
| <i>Cyclothone acclinidens</i> | 0.87     | 3                | 0.014616 |                 |                     | [254]     |
| <i>Cyclothone acclinidens</i> | 0.87     | 3                | 0.016443 | 0.470345        | 0.064681            | [254]     |
| <i>Cyprinus carpio carpio</i> | 10       | 10               | 0.798    |                 |                     | [254]     |
| <i>Cyprinus carpio carpio</i> | 10       | 15               | 1.001    |                 |                     | [254]     |
| <i>Cyprinus carpio carpio</i> | 10       | 20               | 1.449    |                 |                     | [254]     |
| <i>Cyprinus carpio carpio</i> | 106      | 30               | 7.791    |                 |                     | [254]     |
| <i>Cyprinus carpio carpio</i> | 134      | 35               | 11.0684  |                 |                     | [254]     |
| <i>Cyprinus carpio carpio</i> | 146      | 20               | 4.9056   |                 |                     | [254]     |
| <i>Cyprinus carpio carpio</i> | 174      | 10               | 2.0706   |                 |                     | [254]     |
| <i>Cyprinus carpio carpio</i> | 215      | 10               | 3.1605   |                 |                     | [254]     |
| <i>Cyprinus carpio carpio</i> | 315      | 20               | 10.8045  |                 |                     | [254]     |
| <i>Cyprinus carpio carpio</i> | 315      | 20               | 11.907   |                 |                     | [254]     |
| <i>Cyprinus carpio carpio</i> | 554      | 24.5             | 32.1874  |                 |                     | [254]     |
| <i>Cyprinus carpio carpio</i> | 561      | 24.5             | 25.9182  |                 |                     | [254]     |
| <i>Cyprinus carpio carpio</i> | 561      | 24.5             | 27.8817  |                 |                     | [254]     |
| <i>Cyprinus carpio carpio</i> | 561      | 24.5             | 29.0598  |                 |                     | [254]     |
| <i>Cyprinus carpio carpio</i> | 561      | 24.5             | 30.2379  |                 |                     | [254]     |

| Species                          | Mass (g) | Temperature (°C) | MR       | Species Average |                     | Reference |
|----------------------------------|----------|------------------|----------|-----------------|---------------------|-----------|
|                                  |          |                  |          | Mass (g)        | Q <sub>10</sub> SMR |           |
| <i>Cyprinus carpio carpio</i>    | 561      | 24.5             | 31.0233  |                 |                     | [254]     |
| <i>Cyprinus carpio carpio</i>    | 561      | 24.5             | 33.7722  |                 |                     | [254]     |
| <i>Cyprinus carpio carpio</i>    | 561      | 24.5             | 36.9138  |                 |                     | [254]     |
| <i>Cyprinus carpio carpio</i>    | 561      | 24.5             | 37.3065  |                 |                     | [254]     |
| <i>Cyprinus carpio carpio</i>    | 598      | 25.5             | 32.2322  |                 |                     | [254]     |
| <i>Cyprinus carpio carpio</i>    | 1453     | 15               | 44.7524  |                 |                     | [254]     |
| <i>Cyprinus carpio carpio</i>    | 1746     | 15               | 79.443   |                 |                     | [254]     |
| <i>Cyprinus carpio carpio</i>    | 1905     | 15               | 64.008   |                 |                     | [254]     |
| <i>Cyprinus carpio carpio</i>    | 1960     | 15               | 80.948   | 297.8158        | 34.39996            | [254]     |
| <i>Dasyatis sabina</i>           | 329      | 23               | 16.3513  |                 |                     | [254]     |
| <i>Dasyatis sabina</i>           | 350      | 23.5             | 23.765   |                 |                     | [254]     |
| <i>Dasyatis sabina</i>           | 407      | 24.2             | 20.2279  |                 |                     | [254]     |
| <i>Dasyatis sabina</i>           | 431      | 23.8             | 22.9292  |                 |                     | [254]     |
| <i>Dasyatis sabina</i>           | 463      | 22.5             | 24.6316  |                 |                     | [254]     |
| <i>Dasyatis sabina</i>           | 503      | 22.2             | 22.1823  |                 |                     | [254]     |
| <i>Dasyatis sabina</i>           | 504      | 22.4             | 33.516   |                 |                     | [254]     |
| <i>Dasyatis sabina</i>           | 504      | 23               | 25.7544  |                 |                     | [254]     |
| <i>Dasyatis sabina</i>           | 564      | 21.5             | 31.9788  |                 |                     | [254]     |
| <i>Dasyatis sabina</i>           | 859      | 22.5             | 65.5417  | 474.5279        | 56.66567            | [254]     |
| <i>Encheliophis homei</i>        | 0.16     | 30               | 0.021728 |                 |                     | [254]     |
| <i>Encheliophis homei</i>        | 0.23     | 30               | 0.037996 |                 |                     | [254]     |
| <i>Encheliophis homei</i>        | 0.44     | 30               | 0.099484 |                 |                     | [254]     |
| <i>Encheliophis homei</i>        | 0.46     | 30               | 0.072128 |                 |                     | [254]     |
| <i>Encheliophis homei</i>        | 1.2      | 30               | 0.1176   |                 |                     | [254]     |
| <i>Encheliophis homei</i>        | 7.5      | 30               | 0.4515   | 0.637358        | 0.122948            | [254]     |
| <i>Erpetoichthys calabaricus</i> | 27.4     | 27               | 2.2057   | 27.4            | 3.819698            | [254]     |
| <i>Esox lucius</i>               | 600      | 5                | 8.4      |                 |                     | [254]     |
| <i>Esox lucius</i>               | 600      | 10               | 16.8     | 600             | 54.45546            | [254]     |
| <i>Exodon paradoxus</i>          | 3.6      | 30               | 0.26712  |                 |                     | [254]     |
| <i>Exodon paradoxus</i>          | 3.85     | 20               | 0.10241  |                 |                     | [254]     |

| Species                     | Mass (g) | Temperature (°C) | MR       | Species Average |                     | Reference |
|-----------------------------|----------|------------------|----------|-----------------|---------------------|-----------|
|                             |          |                  |          | Mass (g)        | Q <sub>10</sub> SMR |           |
| <i>Exodon paradoxus</i>     | 4.77     | 25               | 0.287154 | 4.043529        | 0.380392            | [254]     |
| <i>Fundulus parvipinnis</i> | 6        | 20               | 0.6006   | 6               | 1.475128            | [254]     |
| <i>Gadus morhua</i>         | 14.7     | 12               | 1.66698  |                 |                     | [254]     |
| <i>Gadus morhua</i>         | 14.7     | 12               | 1.86249  |                 |                     | [254]     |
| <i>Gadus morhua</i>         | 18.3     | 12               | 1.57563  |                 |                     | [254]     |
| <i>Gadus morhua</i>         | 18.3     | 12               | 1.75497  |                 |                     | [254]     |
| <i>Gadus morhua</i>         | 20.4     | 12               | 1.67076  |                 |                     | [254]     |
| <i>Gadus morhua</i>         | 20.4     | 12               | 2.0706   |                 |                     | [254]     |
| <i>Gadus morhua</i>         | 61.1     | 12               | 5.21794  |                 |                     | [254]     |
| <i>Gadus morhua</i>         | 61.1     | 12               | 6.11611  |                 |                     | [254]     |
| <i>Gadus morhua</i>         | 72       | 12               | 4.6872   |                 |                     | [254]     |
| <i>Gadus morhua</i>         | 140      | 15               | 12.74    |                 |                     | [254]     |
| <i>Gadus morhua</i>         | 151.5    | 15               | 13.9986  |                 |                     | [254]     |
| <i>Gadus morhua</i>         | 170      | 11.5             | 13.685   |                 |                     | [254]     |
| <i>Gadus morhua</i>         | 173      | 12               | 10.0513  |                 |                     | [254]     |
| <i>Gadus morhua</i>         | 188.1    | 10               | 13.03533 |                 |                     | [254]     |
| <i>Gadus morhua</i>         | 215      | 12               | 16.1035  |                 |                     | [254]     |
| <i>Gadus morhua</i>         | 218      | 11.5             | 12.971   |                 |                     | [254]     |
| <i>Gadus morhua</i>         | 228      | 12               | 13.8852  |                 |                     | [254]     |
| <i>Gadus morhua</i>         | 228      | 12               | 20.1096  |                 |                     | [254]     |
| <i>Gadus morhua</i>         | 244      | 11.5             | 14.518   |                 |                     | [254]     |
| <i>Gadus morhua</i>         | 254      | 12               | 13.8684  |                 |                     | [254]     |
| <i>Gadus morhua</i>         | 268      | 12               | 11.8188  |                 |                     | [254]     |
| <i>Gadus morhua</i>         | 283      | 11.5             | 19.2157  |                 |                     | [254]     |
| <i>Gadus morhua</i>         | 283      | 12               | 13.867   |                 |                     | [254]     |
| <i>Gadus morhua</i>         | 286      | 11.5             | 17.2172  |                 |                     | [254]     |
| <i>Gadus morhua</i>         | 304      | 11.5             | 9.576    |                 |                     | [254]     |
| <i>Gadus morhua</i>         | 316      | 11.5             | 14.1568  |                 |                     | [254]     |
| <i>Gadus morhua</i>         | 334      | 12               | 32.732   |                 |                     | [254]     |
| <i>Gadus morhua</i>         | 350      | 15               | 20.58    |                 |                     | [254]     |

| Species                        | Mass (g) | Temperature (°C) | MR       | Species Average |                     | Reference |
|--------------------------------|----------|------------------|----------|-----------------|---------------------|-----------|
|                                |          |                  |          | Mass (g)        | Q <sub>10</sub> SMR |           |
| <i>Gadus morhua</i>            | 353      | 12               | 19.2738  |                 |                     | [254]     |
| <i>Gadus morhua</i>            | 382      | 11.5             | 14.9744  |                 |                     | [254]     |
| <i>Gadus morhua</i>            | 440      | 11.5             | 28.644   |                 |                     | [254]     |
| <i>Gadus morhua</i>            | 464      | 12               | 32.8048  |                 |                     | [254]     |
| <i>Gadus morhua</i>            | 510      | 15               | 29.274   |                 |                     | [254]     |
| <i>Gadus morhua</i>            | 518      | 12               | 21.3934  |                 |                     | [254]     |
| <i>Gadus morhua</i>            | 518      | 12               | 38.4356  |                 |                     | [254]     |
| <i>Gadus morhua</i>            | 611      | 12               | 53.4625  |                 |                     | [254]     |
| <i>Gadus morhua</i>            | 645      | 12               | 50.568   |                 |                     | [254]     |
| <i>Gadus morhua</i>            | 700      | 15               | 36.75    |                 |                     | [254]     |
| <i>Gadus morhua</i>            | 720      | 12               | 26.712   |                 |                     | [254]     |
| <i>Gadus morhua</i>            | 803      | 12               | 41.0333  |                 |                     | [254]     |
| <i>Gadus morhua</i>            | 848      | 12               | 27.8992  |                 |                     | [254]     |
| <i>Gadus morhua</i>            | 947      | 12               | 35.1337  |                 |                     | [254]     |
| <i>Gadus morhua</i>            | 1000     | 12               | 39.2     |                 |                     | [254]     |
| <i>Gadus morhua</i>            | 1120     | 12               | 66.64    |                 |                     | [254]     |
| <i>Gadus morhua</i>            | 1140     | 5                | 31.122   |                 |                     | [254]     |
| <i>Gadus morhua</i>            | 1150     | 10               | 46.69    |                 |                     | [254]     |
| <i>Gadus morhua</i>            | 1440     | 15               | 63.504   |                 |                     | [254]     |
| <i>Gadus morhua</i>            | 1580     | 15               | 86.268   |                 |                     | [254]     |
| <i>Gadus morhua</i>            | 2200     | 15               | 109.34   |                 |                     | [254]     |
| <i>Gadus morhua</i>            | 2330     | 5                | 58.716   |                 |                     | [254]     |
| <i>Gadus morhua</i>            | 3030     | 10               | 116.655  | 287.5407        | 62.84377            | [254]     |
| <i>Gambusia affinis</i>        | 0.22     | 20               | 0.042042 |                 |                     | [254]     |
| <i>Gambusia affinis</i>        | 0.22     | 25               | 0.056056 |                 |                     | [254]     |
| <i>Gambusia affinis</i>        | 0.22     | 30               | 0.07007  | 0.22            | 0.104984            | [254]     |
| <i>Genyagnus monopterygius</i> | 53.92    | 17               | 0.981344 |                 |                     | [254]     |
| <i>Genyagnus monopterygius</i> | 66.5     | 17               | 1.2103   |                 |                     | [254]     |
| <i>Genyagnus monopterygius</i> | 69.5     | 17               | 1.1676   |                 |                     | [254]     |
| <i>Genyagnus monopterygius</i> | 74.8     | 17               | 1.20428  |                 |                     | [254]     |

| Species                        | Mass (g) | Temperature (°C) | MR       | Species Average |                     | Reference |
|--------------------------------|----------|------------------|----------|-----------------|---------------------|-----------|
|                                |          |                  |          | Mass (g)        | Q <sub>10</sub> SMR |           |
| <i>Genyagnus monopterygius</i> | 81.9     | 17               | 0.91728  |                 |                     | [254]     |
| <i>Genyagnus monopterygius</i> | 139      | 17               | 2.1406   |                 |                     | [254]     |
| <i>Genyagnus monopterygius</i> | 164      | 17               | 1.148    |                 |                     | [254]     |
| <i>Genyagnus monopterygius</i> | 164      | 17               | 1.4924   |                 |                     | [254]     |
| <i>Genyagnus monopterygius</i> | 164      | 17               | 1.8368   |                 |                     | [254]     |
| <i>Genyagnus monopterygius</i> | 164      | 17               | 2.0664   |                 |                     | [254]     |
| <i>Genyagnus monopterygius</i> | 164      | 17               | 2.1812   |                 |                     | [254]     |
| <i>Genyagnus monopterygius</i> | 164      | 17               | 2.296    |                 |                     | [254]     |
| <i>Genyagnus monopterygius</i> | 164      | 17               | 2.296    |                 |                     | [254]     |
| <i>Genyagnus monopterygius</i> | 164      | 17               | 2.296    |                 |                     | [254]     |
| <i>Genyagnus monopterygius</i> | 164      | 17               | 2.296    |                 |                     | [254]     |
| <i>Genyagnus monopterygius</i> | 164      | 17               | 2.4108   |                 |                     | [254]     |
| <i>Genyagnus monopterygius</i> | 164      | 17               | 2.4108   |                 |                     | [254]     |
| <i>Genyagnus monopterygius</i> | 182      | 17               | 2.1658   |                 |                     | [254]     |
| <i>Genyagnus monopterygius</i> | 231      | 17               | 2.9106   |                 |                     | [254]     |
| <i>Genyagnus monopterygius</i> | 238      | 17               | 3.6652   |                 |                     | [254]     |
| <i>Genyagnus monopterygius</i> | 276      | 17               | 3.2844   | 140.963         | 5.362622            | [254]     |
| <i>Gillichthys mirabilis</i>   | 0.2      | 15               | 0.0196   |                 |                     | [254]     |
| <i>Gillichthys mirabilis</i>   | 0.34     | 15               | 0.023086 |                 |                     | [254]     |
| <i>Gillichthys mirabilis</i>   | 0.41     | 15               | 0.028987 |                 |                     | [254]     |
| <i>Gillichthys mirabilis</i>   | 0.48     | 15               | 0.027552 |                 |                     | [254]     |
| <i>Gillichthys mirabilis</i>   | 0.61     | 15               | 0.048251 |                 |                     | [254]     |
| <i>Gillichthys mirabilis</i>   | 0.63     | 15               | 0.027342 |                 |                     | [254]     |
| <i>Gillichthys mirabilis</i>   | 0.68     | 15               | 0.041412 |                 |                     | [254]     |
| <i>Gillichthys mirabilis</i>   | 0.91     | 15               | 0.045864 |                 |                     | [254]     |
| <i>Gillichthys mirabilis</i>   | 1.29     | 15               | 0.068628 |                 |                     | [254]     |
| <i>Gillichthys mirabilis</i>   | 1.8      | 15               | 0.06804  |                 |                     | [254]     |
| <i>Gillichthys mirabilis</i>   | 1.88     | 15               | 0.103964 |                 |                     | [254]     |
| <i>Gillichthys mirabilis</i>   | 2.11     | 15               | 0.112252 |                 |                     | [254]     |
| <i>Gillichthys mirabilis</i>   | 2.2      | 15               | 0.11858  |                 |                     | [254]     |

| Species                      | Mass (g) | Temperature (°C) | MR       | Species Average |                     | Reference |
|------------------------------|----------|------------------|----------|-----------------|---------------------|-----------|
|                              |          |                  |          | Mass (g)        | Q <sub>10</sub> SMR |           |
| <i>Gillichthys mirabilis</i> | 2.4      | 15               | 0.0924   |                 |                     | [254]     |
| <i>Gillichthys mirabilis</i> | 2.4      | 15               | 0.10752  |                 |                     | [254]     |
| <i>Gillichthys mirabilis</i> | 2.89     | 15               | 0.147679 |                 |                     | [254]     |
| <i>Gillichthys mirabilis</i> | 2.93     | 15               | 0.125111 |                 |                     | [254]     |
| <i>Gillichthys mirabilis</i> | 2.93     | 15               | 0.147672 |                 |                     | [254]     |
| <i>Gillichthys mirabilis</i> | 3.24     | 15               | 0.099792 |                 |                     | [254]     |
| <i>Gillichthys mirabilis</i> | 4.14     | 15               | 0.156492 |                 |                     | [254]     |
| <i>Gillichthys mirabilis</i> | 4.72     | 15               | 0.194936 | 1.354302        | 0.219145            | [254]     |
| <i>Glossogobius giuris</i>   | 1.6      | 22               | 0.37968  |                 |                     | [254]     |
| <i>Glossogobius giuris</i>   | 2.5      | 22               | 0.49875  |                 |                     | [254]     |
| <i>Glossogobius giuris</i>   | 3.8      | 22               | 0.75544  |                 |                     | [254]     |
| <i>Glossogobius giuris</i>   | 4.6      | 22               | 0.6923   |                 |                     | [254]     |
| <i>Glossogobius giuris</i>   | 7.3      | 22               | 1.27239  |                 |                     | [254]     |
| <i>Glossogobius giuris</i>   | 8.3      | 22               | 1.23172  |                 |                     | [254]     |
| <i>Glossogobius giuris</i>   | 10.2     | 22               | 1.37088  |                 |                     | [254]     |
| <i>Glossogobius giuris</i>   | 11       | 22               | 1.2628   |                 |                     | [254]     |
| <i>Glossogobius giuris</i>   | 12       | 22               | 1.47     |                 |                     | [254]     |
| <i>Glossogobius giuris</i>   | 12.9     | 25               | 1.15584  |                 |                     | [254]     |
| <i>Glossogobius giuris</i>   | 13.13    | 25               | 1.305122 |                 |                     | [254]     |
| <i>Glossogobius giuris</i>   | 13.35    | 25               | 1.40175  |                 |                     | [254]     |
| <i>Glossogobius giuris</i>   | 13.5     | 22               | 1.44585  |                 |                     | [254]     |
| <i>Glossogobius giuris</i>   | 13.5     | 25               | 1.701    |                 |                     | [254]     |
| <i>Glossogobius giuris</i>   | 13.76    | 25               | 1.242528 |                 |                     | [254]     |
| <i>Glossogobius giuris</i>   | 14.14    | 25               | 1.227352 |                 |                     | [254]     |
| <i>Glossogobius giuris</i>   | 14.17    | 25               | 1.279551 |                 |                     | [254]     |
| <i>Glossogobius giuris</i>   | 14.3     | 22               | 1.76176  |                 |                     | [254]     |
| <i>Glossogobius giuris</i>   | 16.5     | 22               | 1.3167   |                 |                     | [254]     |
| <i>Glossogobius giuris</i>   | 17.7     | 22               | 1.54875  |                 |                     | [254]     |
| <i>Glossogobius giuris</i>   | 18.7     | 22               | 2.21221  |                 |                     | [254]     |
| <i>Glossogobius giuris</i>   | 19.3     | 22               | 2.22915  |                 |                     | [254]     |

| Species                             | Mass (g) | Temperature (°C) | MR       | Species Average |                     | Reference |
|-------------------------------------|----------|------------------|----------|-----------------|---------------------|-----------|
|                                     |          |                  |          | Mass (g)        | Q <sub>10</sub> SMR |           |
| <i>Glossogobius giuris</i>          | 20.4     | 22               | 1.9992   |                 |                     | [254]     |
| <i>Glossogobius giuris</i>          | 23.2     | 22               | 1.98128  | 10.65873        | 2.691294            | [254]     |
| <i>Heteropneustes fossilis</i>      | 9        | 26               | 1.2285   |                 |                     | [254]     |
| <i>Heteropneustes fossilis</i>      | 10       | 26               | 1.197    |                 |                     | [254]     |
| <i>Heteropneustes fossilis</i>      | 15       | 26               | 1.3965   |                 |                     | [254]     |
| <i>Heteropneustes fossilis</i>      | 16       | 26               | 1.456    |                 |                     | [254]     |
| <i>Heteropneustes fossilis</i>      | 17       | 26               | 1.4756   |                 |                     | [254]     |
| <i>Heteropneustes fossilis</i>      | 23       | 26               | 1.9803   |                 |                     | [254]     |
| <i>Heteropneustes fossilis</i>      | 26       | 26               | 2.2022   |                 |                     | [254]     |
| <i>Heteropneustes fossilis</i>      | 36       | 26               | 2.9232   |                 |                     | [254]     |
| <i>Heteropneustes fossilis</i>      | 44       | 26               | 3.5728   |                 |                     | [254]     |
| <i>Heteropneustes fossilis</i>      | 56       | 26               | 4.4688   |                 |                     | [254]     |
| <i>Heteropneustes fossilis</i>      | 75       | 26               | 4.8825   | 23.91117        | 3.90164             | [254]     |
| <i>Hippoglossoides platessoides</i> | 231      | 3.5              | 3.3957   |                 |                     | [254]     |
| <i>Hippoglossoides platessoides</i> | 268      | 3.5              | 4.1272   |                 |                     | [254]     |
| <i>Hippoglossoides platessoides</i> | 294      | 3.5              | 3.7044   |                 |                     | [254]     |
| <i>Hippoglossoides platessoides</i> | 344      | 3.5              | 4.3344   |                 |                     | [254]     |
| <i>Hippoglossoides platessoides</i> | 390      | 3.5              | 4.641    | 300.2918        | 22.47692            | [254]     |
| <i>Ictalurus punctatus</i>          | 4.43     | 23.5             | 0.46515  |                 |                     | [254]     |
| <i>Ictalurus punctatus</i>          | 5.37     | 23.5             | 1.157772 |                 |                     | [254]     |
| <i>Ictalurus punctatus</i>          | 5.43     | 23.5             | 0.391503 |                 |                     | [254]     |
| <i>Ictalurus punctatus</i>          | 6.71     | 23.5             | 1.296372 |                 |                     | [254]     |
| <i>Ictalurus punctatus</i>          | 7.24     | 23.5             | 0.881832 |                 |                     | [254]     |
| <i>Ictalurus punctatus</i>          | 7.25     | 23.5             | 0.76125  |                 |                     | [254]     |
| <i>Ictalurus punctatus</i>          | 7.61     | 23.5             | 0.548681 |                 |                     | [254]     |
| <i>Ictalurus punctatus</i>          | 8.27     | 23.5             | 1.325681 |                 |                     | [254]     |
| <i>Ictalurus punctatus</i>          | 825      | 18               | 24.255   | 11.00221        | 2.422681            | [254]     |
| <i>Kuhlia sandvicensis</i>          | 13.24    | 23               | 0.815584 |                 |                     | [254]     |
| <i>Kuhlia sandvicensis</i>          | 15.67    | 23               | 0.866551 |                 |                     | [254]     |
| <i>Kuhlia sandvicensis</i>          | 16.26    | 23               | 0.830886 |                 |                     | [254]     |



| Species                     | Mass (g) | Temperature (°C) | MR       | Species Average |                     | Reference |
|-----------------------------|----------|------------------|----------|-----------------|---------------------|-----------|
|                             |          |                  |          | Mass (g)        | Q <sub>10</sub> SMR |           |
| <i>Kuhlia sandvicensis</i>  | 19.61    | 23               | 1.125614 |                 |                     | [254]     |
| <i>Kuhlia sandvicensis</i>  | 20.55    | 23               | 0.992565 |                 |                     | [254]     |
| <i>Kuhlia sandvicensis</i>  | 26.22    | 23               | 1.266426 |                 |                     | [254]     |
| <i>Kuhlia sandvicensis</i>  | 27.48    | 23               | 1.288812 |                 |                     | [254]     |
| <i>Kuhlia sandvicensis</i>  | 29.06    | 23               | 1.464624 |                 |                     | [254]     |
| <i>Kuhlia sandvicensis</i>  | 36.38    | 23               | 1.578892 |                 |                     | [254]     |
| <i>Kuhlia sandvicensis</i>  | 46.41    | 23               | 2.111655 |                 |                     | [254]     |
| <i>Kuhlia sandvicensis</i>  | 47.29    | 23               | 2.217901 |                 |                     | [254]     |
| <i>Kuhlia sandvicensis</i>  | 55.97    | 23               | 2.311561 | 26.63029        | 2.781161            | [254]     |
| <i>Labeo rohita</i>         | 6        | 25               | 4.6116   |                 |                     | [254]     |
| <i>Labeo rohita</i>         | 7        | 25               | 3.3173   |                 |                     | [254]     |
| <i>Labeo rohita</i>         | 8.5      | 25               | 3.31415  |                 |                     | [254]     |
| <i>Labeo rohita</i>         | 11.5     | 25               | 3.30855  |                 |                     | [254]     |
| <i>Labeo rohita</i>         | 11.5     | 25               | 3.32465  | 8.606227        | 6.778311            | [254]     |
| <i>Lampetra fluviatilis</i> | 1.43     | 4.4              | 0.017017 |                 |                     | [254]     |
| <i>Lampetra fluviatilis</i> | 1.43     | 4.8              | 0.035035 |                 |                     | [254]     |
| <i>Lampetra fluviatilis</i> | 1.43     | 9.4              | 0.041041 |                 |                     | [254]     |
| <i>Lampetra fluviatilis</i> | 1.43     | 9.8              | 0.084084 |                 |                     | [254]     |
| <i>Lampetra fluviatilis</i> | 1.43     | 10               | 0.038038 |                 |                     | [254]     |
| <i>Lampetra fluviatilis</i> | 1.43     | 10               | 0.041041 |                 |                     | [254]     |
| <i>Lampetra fluviatilis</i> | 1.43     | 10               | 0.044044 |                 |                     | [254]     |
| <i>Lampetra fluviatilis</i> | 1.43     | 10               | 0.049049 |                 |                     | [254]     |
| <i>Lampetra fluviatilis</i> | 1.43     | 10               | 0.084084 |                 |                     | [254]     |
| <i>Lampetra fluviatilis</i> | 1.43     | 14.4             | 0.078078 |                 |                     | [254]     |
| <i>Lampetra fluviatilis</i> | 1.43     | 14.7             | 0.14014  |                 |                     | [254]     |
| <i>Lampetra fluviatilis</i> | 23.3     | 16               | 1.82672  |                 |                     | [254]     |
| <i>Lampetra fluviatilis</i> | 28.6     | 16               | 1.74174  |                 |                     | [254]     |
| <i>Lampetra fluviatilis</i> | 29.3     | 9.5              | 0.94346  |                 |                     | [254]     |
| <i>Lampetra fluviatilis</i> | 30.3     | 9.5              | 0.86961  |                 |                     | [254]     |
| <i>Lampetra fluviatilis</i> | 32.8     | 9.5              | 0.82656  |                 |                     | [254]     |

| Species                     | Mass (g) | Temperature (°C) | MR      | Species Average |                     | Reference |
|-----------------------------|----------|------------------|---------|-----------------|---------------------|-----------|
|                             |          |                  |         | Mass (g)        | Q <sub>10</sub> SMR |           |
| <i>Lampetra fluviatilis</i> | 32.8     | 9.5              | 1.21688 |                 |                     | [254]     |
| <i>Lampetra fluviatilis</i> | 33.2     | 16               | 1.76624 |                 |                     | [254]     |
| <i>Lampetra fluviatilis</i> | 39.4     | 9.5              | 1.21352 |                 |                     | [254]     |
| <i>Lampetra fluviatilis</i> | 41.2     | 9.5              | 1.03824 |                 |                     | [254]     |
| <i>Lampetra fluviatilis</i> | 42.2     | 16               | 2.3632  |                 |                     | [254]     |
| <i>Lampetra fluviatilis</i> | 42.7     | 9.5              | 1.10593 |                 |                     | [254]     |
| <i>Lampetra fluviatilis</i> | 43.7     | 9.5              | 1.13183 |                 |                     | [254]     |
| <i>Lampetra fluviatilis</i> | 44.2     | 9.5              | 1.05196 |                 |                     | [254]     |
| <i>Lampetra fluviatilis</i> | 45.2     | 16               | 3.13236 |                 |                     | [254]     |
| <i>Lampetra fluviatilis</i> | 45.7     | 9.5              | 1.50353 |                 |                     | [254]     |
| <i>Lampetra fluviatilis</i> | 46.8     | 9.5              | 1.24488 |                 |                     | [254]     |
| <i>Lampetra fluviatilis</i> | 46.8     | 9.5              | 1.27764 |                 |                     | [254]     |
| <i>Lampetra fluviatilis</i> | 46.8     | 9.5              | 1.3104  |                 |                     | [254]     |
| <i>Lampetra fluviatilis</i> | 46.8     | 9.5              | 1.34316 |                 |                     | [254]     |
| <i>Lampetra fluviatilis</i> | 48.9     | 16               | 3.66261 |                 |                     | [254]     |
| <i>Lampetra fluviatilis</i> | 49.5     | 9.5              | 1.3167  |                 |                     | [254]     |
| <i>Lampetra fluviatilis</i> | 49.5     | 16               | 3.56895 |                 |                     | [254]     |
| <i>Lampetra fluviatilis</i> | 50.7     | 16               | 2.69724 |                 |                     | [254]     |
| <i>Lampetra fluviatilis</i> | 52.4     | 9.5              | 1.24712 |                 |                     | [254]     |
| <i>Lampetra fluviatilis</i> | 53       | 9.5              | 1.484   |                 |                     | [254]     |
| <i>Lampetra fluviatilis</i> | 53       | 16               | 3.71    |                 |                     | [254]     |
| <i>Lampetra fluviatilis</i> | 54.2     | 16               | 3.11108 |                 |                     | [254]     |
| <i>Lampetra fluviatilis</i> | 55.5     | 9.5              | 1.6317  |                 |                     | [254]     |
| <i>Lampetra fluviatilis</i> | 55.5     | 9.5              | 1.82595 |                 |                     | [254]     |
| <i>Lampetra fluviatilis</i> | 56.1     | 9.5              | 1.37445 |                 |                     | [254]     |
| <i>Lampetra fluviatilis</i> | 56.8     | 9.5              | 1.51088 |                 |                     | [254]     |
| <i>Lampetra fluviatilis</i> | 56.8     | 9.5              | 2.06752 |                 |                     | [254]     |
| <i>Lampetra fluviatilis</i> | 58.8     | 9.5              | 1.56408 |                 |                     | [254]     |
| <i>Lampetra fluviatilis</i> | 62.2     | 9.5              | 1.9593  |                 |                     | [254]     |
| <i>Lampetra fluviatilis</i> | 63.6     | 9.5              | 1.5582  | 19.73407        | 2.709862            | [254]     |

| Species                    | Mass (g) | Temperature (°C) | MR       | Species Average |                     | Reference |
|----------------------------|----------|------------------|----------|-----------------|---------------------|-----------|
|                            |          |                  |          | Mass (g)        | Q <sub>10</sub> SMR |           |
| <i>Lampetra planeri</i>    | 2.79     | 5.3              | 0.027342 |                 |                     | [254]     |
| <i>Lampetra planeri</i>    | 2.79     | 5.7              | 0.05859  |                 |                     | [254]     |
| <i>Lampetra planeri</i>    | 2.79     | 10               | 0.056637 |                 |                     | [254]     |
| <i>Lampetra planeri</i>    | 2.79     | 10               | 0.062496 |                 |                     | [254]     |
| <i>Lampetra planeri</i>    | 2.79     | 10               | 0.070308 |                 |                     | [254]     |
| <i>Lampetra planeri</i>    | 2.79     | 10               | 0.080073 |                 |                     | [254]     |
| <i>Lampetra planeri</i>    | 2.79     | 10               | 0.089838 |                 |                     | [254]     |
| <i>Lampetra planeri</i>    | 2.79     | 10               | 0.109368 |                 |                     | [254]     |
| <i>Lampetra planeri</i>    | 2.79     | 10               | 0.121086 |                 |                     | [254]     |
| <i>Lampetra planeri</i>    | 2.79     | 10               | 0.138663 |                 |                     | [254]     |
| <i>Lampetra planeri</i>    | 2.79     | 10               | 0.140616 |                 |                     | [254]     |
| <i>Lampetra planeri</i>    | 2.79     | 10               | 0.160146 |                 |                     | [254]     |
| <i>Lampetra planeri</i>    | 2.79     | 10               | 0.197253 |                 |                     | [254]     |
| <i>Lampetra planeri</i>    | 2.79     | 10.3             | 0.054684 |                 |                     | [254]     |
| <i>Lampetra planeri</i>    | 2.79     | 10.6             | 0.13671  |                 |                     | [254]     |
| <i>Lampetra planeri</i>    | 2.79     | 15.2             | 0.11718  |                 |                     | [254]     |
| <i>Lampetra planeri</i>    | 2.79     | 15.6             | 0.201159 | 2.79            | 0.381034            | [254]     |
| <i>Lepomis gibbosus</i>    | 44.92    | 20               | 1.41498  | 44.92           | 3.475318            | [254]     |
| <i>Lepomis macrochirus</i> | 118      | 25               | 8.3426   |                 |                     | [254]     |
| <i>Lepomis macrochirus</i> | 118      | 25               | 8.5078   |                 |                     | [254]     |
| <i>Lepomis macrochirus</i> | 118      | 25               | 8.7556   |                 |                     | [254]     |
| <i>Lepomis macrochirus</i> | 118      | 25               | 8.8382   | 118             | 16.47347            | [254]     |
| <i>Leporinus fasciatus</i> | 3.95     | 25               | 0.384335 |                 |                     | [254]     |
| <i>Leporinus fasciatus</i> | 7.6      | 30               | 0.84588  | 5.479051        | 0.963057            | [254]     |
| <i>Leuciscus idus</i>      | 600      | 5                | 8.4      |                 |                     | [254]     |
| <i>Leuciscus idus</i>      | 600      | 10               | 15.96    | 600             | 53.07662            | [254]     |
| <i>Limanda limanda</i>     | 236      | 10               | 4.7908   |                 |                     | [254]     |
| <i>Limanda limanda</i>     | 396      | 15               | 11.6424  |                 |                     | [254]     |
| <i>Limanda limanda</i>     | 400      | 5                | 4.2      | 334.3662        | 24.94288            | [254]     |
| <i>Lipophrys pholis</i>    | 0.03     | 16               | 0.015225 |                 |                     | [254]     |

| Species                 | Mass (g) | Temperature (°C) | MR       | Species Average |                     | Reference |
|-------------------------|----------|------------------|----------|-----------------|---------------------|-----------|
|                         |          |                  |          | Mass (g)        | Q <sub>10</sub> SMR |           |
| <i>Lipophrys pholis</i> | 0.06     | 16               | 0.02562  |                 |                     | [254]     |
| <i>Lipophrys pholis</i> | 0.06     | 16               | 0.03024  |                 |                     | [254]     |
| <i>Lipophrys pholis</i> | 0.18     | 16               | 0.094752 |                 |                     | [254]     |
| <i>Lipophrys pholis</i> | 0.2      | 16               | 0.06048  |                 |                     | [254]     |
| <i>Lipophrys pholis</i> | 0.2      | 16               | 0.0609   |                 |                     | [254]     |
| <i>Lipophrys pholis</i> | 0.2      | 16               | 0.06818  |                 |                     | [254]     |
| <i>Lipophrys pholis</i> | 0.2      | 16               | 0.0903   |                 |                     | [254]     |
| <i>Lipophrys pholis</i> | 0.22     | 16               | 0.117502 |                 |                     | [254]     |
| <i>Lipophrys pholis</i> | 0.23     | 16               | 0.073416 |                 |                     | [254]     |
| <i>Lipophrys pholis</i> | 0.23     | 16               | 0.086618 |                 |                     | [254]     |
| <i>Lipophrys pholis</i> | 0.23     | 16               | 0.096761 |                 |                     | [254]     |
| <i>Lipophrys pholis</i> | 0.23     | 16               | 0.11431  |                 |                     | [254]     |
| <i>Lipophrys pholis</i> | 0.23     | 16               | 0.120911 |                 |                     | [254]     |
| <i>Lipophrys pholis</i> | 0.24     | 16               | 0.072408 |                 |                     | [254]     |
| <i>Lipophrys pholis</i> | 0.25     | 16               | 0.089075 |                 |                     | [254]     |
| <i>Lipophrys pholis</i> | 0.27     | 16               | 0.08127  |                 |                     | [254]     |
| <i>Lipophrys pholis</i> | 0.27     | 16               | 0.101493 |                 |                     | [254]     |
| <i>Lipophrys pholis</i> | 0.28     | 16               | 0.08428  |                 |                     | [254]     |
| <i>Lipophrys pholis</i> | 0.35     | 16               | 0.09457  |                 |                     | [254]     |
| <i>Lipophrys pholis</i> | 0.38     | 16               | 0.07315  |                 |                     | [254]     |
| <i>Lipophrys pholis</i> | 0.38     | 16               | 0.077406 |                 |                     | [254]     |
| <i>Lipophrys pholis</i> | 0.41     | 16               | 0.093275 |                 |                     | [254]     |
| <i>Lipophrys pholis</i> | 0.59     | 16               | 0.176351 |                 |                     | [254]     |
| <i>Lipophrys pholis</i> | 0.63     | 16               | 0.210357 |                 |                     | [254]     |
| <i>Lipophrys pholis</i> | 0.66     | 16               | 0.149226 |                 |                     | [254]     |
| <i>Lipophrys pholis</i> | 0.66     | 16               | 0.176484 |                 |                     | [254]     |
| <i>Lipophrys pholis</i> | 0.66     | 16               | 0.232848 |                 |                     | [254]     |
| <i>Lipophrys pholis</i> | 0.7      | 16               | 0.20874  |                 |                     | [254]     |
| <i>Lipophrys pholis</i> | 0.73     | 16               | 0.111398 |                 |                     | [254]     |
| <i>Lipophrys pholis</i> | 0.78     | 16               | 0.16653  |                 |                     | [254]     |

| Species                 | Mass (g) | Temperature (°C) | MR       | Species Average |                     | Reference |
|-------------------------|----------|------------------|----------|-----------------|---------------------|-----------|
|                         |          |                  |          | Mass (g)        | Q <sub>10</sub> SMR |           |
| <i>Lipophrys pholis</i> | 0.79     | 16               | 0.150969 |                 |                     | [254]     |
| <i>Lipophrys pholis</i> | 0.82     | 16               | 0.139482 |                 |                     | [254]     |
| <i>Lipophrys pholis</i> | 0.93     | 16               | 0.198555 |                 |                     | [254]     |
| <i>Lipophrys pholis</i> | 0.93     | 16               | 0.23436  |                 |                     | [254]     |
| <i>Lipophrys pholis</i> | 0.98     | 16               | 0.157094 |                 |                     | [254]     |
| <i>Lipophrys pholis</i> | 1.38     | 16               | 0.483    |                 |                     | [254]     |
| <i>Lipophrys pholis</i> | 1.54     | 16               | 0.175714 |                 |                     | [254]     |
| <i>Lipophrys pholis</i> | 1.55     | 16               | 0.3472   |                 |                     | [254]     |
| <i>Lipophrys pholis</i> | 1.55     | 16               | 0.484995 |                 |                     | [254]     |
| <i>Lipophrys pholis</i> | 1.55     | 16               | 0.756245 |                 |                     | [254]     |
| <i>Lipophrys pholis</i> | 1.56     | 16               | 0.411684 |                 |                     | [254]     |
| <i>Lipophrys pholis</i> | 1.63     | 16               | 0.233905 |                 |                     | [254]     |
| <i>Lipophrys pholis</i> | 1.63     | 16               | 0.274981 |                 |                     | [254]     |
| <i>Lipophrys pholis</i> | 1.63     | 16               | 0.290955 |                 |                     | [254]     |
| <i>Lipophrys pholis</i> | 1.73     | 16               | 0.245833 |                 |                     | [254]     |
| <i>Lipophrys pholis</i> | 1.73     | 16               | 0.366933 |                 |                     | [254]     |
| <i>Lipophrys pholis</i> | 2.42     | 16               | 0.484484 |                 |                     | [254]     |
| <i>Lipophrys pholis</i> | 2.71     | 16               | 0.457177 |                 |                     | [254]     |
| <i>Lipophrys pholis</i> | 2.84     | 16               | 0.42742  |                 |                     | [254]     |
| <i>Lipophrys pholis</i> | 2.84     | 16               | 0.463204 |                 |                     | [254]     |
| <i>Lipophrys pholis</i> | 3.03     | 16               | 0.458136 |                 |                     | [254]     |
| <i>Lipophrys pholis</i> | 3.03     | 16               | 0.483588 |                 |                     | [254]     |
| <i>Lipophrys pholis</i> | 3.06     | 16               | 0.38556  |                 |                     | [254]     |
| <i>Lipophrys pholis</i> | 3.08     | 16               | 0.612304 |                 |                     | [254]     |
| <i>Lipophrys pholis</i> | 3.34     | 16               | 0.778554 |                 |                     | [254]     |
| <i>Lipophrys pholis</i> | 3.92     | 16               | 0.565264 |                 |                     | [254]     |
| <i>Lipophrys pholis</i> | 4.25     | 16               | 0.8449   |                 |                     | [254]     |
| <i>Lipophrys pholis</i> | 4.49     | 16               | 0.75432  |                 |                     | [254]     |
| <i>Lipophrys pholis</i> | 4.57     | 16               | 0.457457 |                 |                     | [254]     |
| <i>Lipophrys pholis</i> | 4.75     | 16               | 0.754775 |                 |                     | [254]     |

| Species                 | Mass (g) | Temperature (°C) | MR       | Species Average |                     | Reference |
|-------------------------|----------|------------------|----------|-----------------|---------------------|-----------|
|                         |          |                  |          | Mass (g)        | Q <sub>10</sub> SMR |           |
| <i>Lipophrys pholis</i> | 4.75     | 16               | 0.84455  |                 |                     | [254]     |
| <i>Lipophrys pholis</i> | 5.12     | 16               | 0.57344  |                 |                     | [254]     |
| <i>Lipophrys pholis</i> | 5.31     | 16               | 1.111383 |                 |                     | [254]     |
| <i>Lipophrys pholis</i> | 5.62     | 16               | 0.715988 |                 |                     | [254]     |
| <i>Lipophrys pholis</i> | 5.74     | 16               | 0.510286 |                 |                     | [254]     |
| <i>Lipophrys pholis</i> | 5.85     | 16               | 0.986895 |                 |                     | [254]     |
| <i>Lipophrys pholis</i> | 5.95     | 16               | 0.57477  |                 |                     | [254]     |
| <i>Lipophrys pholis</i> | 5.95     | 16               | 0.9996   |                 |                     | [254]     |
| <i>Lipophrys pholis</i> | 6.08     | 16               | 0.485184 |                 |                     | [254]     |
| <i>Lipophrys pholis</i> | 6.29     | 16               | 0.713286 |                 |                     | [254]     |
| <i>Lipophrys pholis</i> | 6.29     | 16               | 0.796943 |                 |                     | [254]     |
| <i>Lipophrys pholis</i> | 6.29     | 16               | 0.845376 |                 |                     | [254]     |
| <i>Lipophrys pholis</i> | 6.29     | 16               | 0.942242 |                 |                     | [254]     |
| <i>Lipophrys pholis</i> | 6.29     | 16               | 1.052317 |                 |                     | [254]     |
| <i>Lipophrys pholis</i> | 6.59     | 16               | 0.987182 |                 |                     | [254]     |
| <i>Lipophrys pholis</i> | 6.65     | 16               | 1.47098  |                 |                     | [254]     |
| <i>Lipophrys pholis</i> | 6.86     | 16               | 1.253322 |                 |                     | [254]     |
| <i>Lipophrys pholis</i> | 7.22     | 16               | 0.641858 |                 |                     | [254]     |
| <i>Lipophrys pholis</i> | 7.22     | 16               | 0.7581   |                 |                     | [254]     |
| <i>Lipophrys pholis</i> | 7.44     | 16               | 0.775992 |                 |                     | [254]     |
| <i>Lipophrys pholis</i> | 7.64     | 16               | 0.679196 |                 |                     | [254]     |
| <i>Lipophrys pholis</i> | 7.64     | 16               | 0.8022   |                 |                     | [254]     |
| <i>Lipophrys pholis</i> | 7.87     | 16               | 1.245034 |                 |                     | [254]     |
| <i>Lipophrys pholis</i> | 8.32     | 16               | 0.995904 |                 |                     | [254]     |
| <i>Lipophrys pholis</i> | 9.31     | 16               | 1.114407 |                 |                     | [254]     |
| <i>Lipophrys pholis</i> | 9.6      | 16               | 0.90048  |                 |                     | [254]     |
| <i>Lipophrys pholis</i> | 12.3     | 16               | 1.38621  |                 |                     | [254]     |
| <i>Lipophrys pholis</i> | 13       | 16               | 1.3104   |                 |                     | [254]     |
| <i>Lipophrys pholis</i> | 13       | 16               | 1.4651   |                 |                     | [254]     |
| <i>Lipophrys pholis</i> | 14.3     | 16               | 0.95095  |                 |                     | [254]     |

| Species                         | Mass (g) | Temperature (°C) | MR       | Species Average |                     | Reference |
|---------------------------------|----------|------------------|----------|-----------------|---------------------|-----------|
|                                 |          |                  |          | Mass (g)        | Q <sub>10</sub> SMR |           |
| <i>Lipophrys pholis</i>         | 16.6     | 16               | 2.02188  |                 |                     | [254]     |
| <i>Lipophrys pholis</i>         | 18.7     | 16               | 1.79333  |                 |                     | [254]     |
| <i>Lipophrys pholis</i>         | 18.7     | 16               | 2.01586  |                 |                     | [254]     |
| <i>Lipophrys pholis</i>         | 20.2     | 16               | 1.2726   |                 |                     | [254]     |
| <i>Lipophrys pholis</i>         | 20.4     | 16               | 1.94208  |                 |                     | [254]     |
| <i>Lipophrys pholis</i>         | 21.6     | 16               | 2.05632  |                 |                     | [254]     |
| <i>Lipophrys pholis</i>         | 22.6     | 16               | 1.582    |                 |                     | [254]     |
| <i>Lipophrys pholis</i>         | 22.8     | 16               | 1.93116  | 1.928107        | 1.068919            | [254]     |
| <i>Lipophrys pholis</i>         | 8        | 29               | 0.84     | 8               | 1.316441            | [254]     |
| <i>Macrogathus aculeatus</i>    | 5        | 21               | 0.4025   |                 |                     | [254]     |
| <i>Macrogathus aculeatus</i>    | 6        | 30               | 0.7098   |                 |                     | [254]     |
| <i>Macrogathus aculeatus</i>    | 11       | 21               | 0.6853   |                 |                     | [254]     |
| <i>Macrogathus aculeatus</i>    | 12.88    | 30               | 1.199128 |                 |                     | [254]     |
| <i>Macrogathus aculeatus</i>    | 23.5     | 21               | 1.4476   |                 |                     | [254]     |
| <i>Macrogathus aculeatus</i>    | 26.17    | 30               | 2.070047 |                 |                     | [254]     |
| <i>Macrogathus aculeatus</i>    | 35       | 30               | 2.646    |                 |                     | [254]     |
| <i>Macrogathus aculeatus</i>    | 37       | 21               | 1.7612   |                 |                     | [254]     |
| <i>Macrogathus aculeatus</i>    | 42.5     | 30               | 2.856    |                 |                     | [254]     |
| <i>Macrogathus aculeatus</i>    | 45.5     | 21               | 2.0384   |                 |                     | [254]     |
| <i>Macrogathus aculeatus</i>    | 53       | 21               | 1.8179   |                 |                     | [254]     |
| <i>Macrogathus aculeatus</i>    | 53.5     | 30               | 3.2956   | 22.68385        | 2.770269            | [254]     |
| <i>Melanogrammus aeglefinus</i> | 155.9    | 10               | 3.71042  |                 |                     | [254]     |
| <i>Melanogrammus aeglefinus</i> | 155.9    | 10               | 4.3652   |                 |                     | [254]     |
| <i>Melanogrammus aeglefinus</i> | 155.9    | 10               | 5.56563  |                 |                     | [254]     |
| <i>Melanogrammus aeglefinus</i> | 155.9    | 10               | 6.76606  |                 |                     | [254]     |
| <i>Melanogrammus aeglefinus</i> | 155.9    | 10               | 7.52997  |                 |                     | [254]     |
| <i>Melanogrammus aeglefinus</i> | 156      | 10               | 6.552    | 155.9167        | 22.56597            | [254]     |
| <i>Micropterus salmoides</i>    | 178      | 15               | 2.3674   |                 |                     | [254]     |
| <i>Micropterus salmoides</i>    | 178      | 30               | 4.4856   |                 |                     | [254]     |
| <i>Micropterus salmoides</i>    | 350      | 20               | 16.66    |                 |                     | [254]     |

| Species                      | Mass (g) | Temperature (°C) | MR       | Species Average |                     | Reference |
|------------------------------|----------|------------------|----------|-----------------|---------------------|-----------|
|                              |          |                  |          | Mass (g)        | Q <sub>10</sub> SMR |           |
| <i>Micropterus salmoides</i> | 350      | 25               | 25.235   |                 |                     | [254]     |
| <i>Micropterus salmoides</i> | 350      | 25               | 25.97    |                 |                     | [254]     |
| <i>Micropterus salmoides</i> | 350      | 30               | 36.995   |                 |                     | [254]     |
| <i>Micropterus salmoides</i> | 350      | 30               | 42.63    | 288.5151        | 28.98299            | [254]     |
| <i>Microstomus kitt</i>      | 221      | 15               | 8.0444   |                 |                     | [254]     |
| <i>Microstomus kitt</i>      | 229      | 5                | 4.6487   |                 |                     | [254]     |
| <i>Microstomus kitt</i>      | 249      | 10               | 5.7519   | 232.7068        | 24.24332            | [254]     |
| <i>Monopterus cuchia</i>     | 1.98     | 25               | 1.369368 |                 |                     | [254]     |
| <i>Monopterus cuchia</i>     | 2.96     | 25               | 1.313648 |                 |                     | [254]     |
| <i>Monopterus cuchia</i>     | 7.79     | 25               | 1.74496  |                 |                     | [254]     |
| <i>Monopterus cuchia</i>     | 28.8     | 25               | 2.47968  |                 |                     | [254]     |
| <i>Monopterus cuchia</i>     | 53.8     | 25               | 3.08812  |                 |                     | [254]     |
| <i>Monopterus cuchia</i>     | 59.5     | 25               | 3.20705  |                 |                     | [254]     |
| <i>Monopterus cuchia</i>     | 60.7     | 25               | 2.63438  |                 |                     | [254]     |
| <i>Monopterus cuchia</i>     | 83.76    | 25               | 2.872968 |                 |                     | [254]     |
| <i>Monopterus cuchia</i>     | 166.06   | 25               | 3.371018 |                 |                     | [254]     |
| <i>Monopterus cuchia</i>     | 172.88   | 25               | 3.509464 | 30.11911        | 4.631719            | [254]     |
| <i>Mugil cephalus</i>        | 79       | 16               | 4.8664   |                 |                     | [254]     |
| <i>Mugil cephalus</i>        | 100      | 20.8             | 14.56    |                 |                     | [254]     |
| <i>Mugil cephalus</i>        | 102      | 21.5             | 13.1376  |                 |                     | [254]     |
| <i>Mugil cephalus</i>        | 110      | 21               | 9.548    |                 |                     | [254]     |
| <i>Mugil cephalus</i>        | 115      | 15.4             | 5.0715   |                 |                     | [254]     |
| <i>Mugil cephalus</i>        | 116      | 19.3             | 11.9364  |                 |                     | [254]     |
| <i>Mugil cephalus</i>        | 140      | 20               | 9.702    |                 |                     | [254]     |
| <i>Mugil cephalus</i>        | 140      | 20               | 13.132   |                 |                     | [254]     |
| <i>Mugil cephalus</i>        | 140      | 20               | 15.68    |                 |                     | [254]     |
| <i>Mugil cephalus</i>        | 140      | 20               | 15.876   |                 |                     | [254]     |
| <i>Mugil cephalus</i>        | 210      | 28.5             | 31.458   |                 |                     | [254]     |
| <i>Mugil cephalus</i>        | 214      | 28.5             | 29.5106  |                 |                     | [254]     |
| <i>Mugil cephalus</i>        | 219      | 28.5             | 32.0397  |                 |                     | [254]     |



| Species                    | Mass (g) | Temperature (°C) | MR      | Species Average |                     | Reference |
|----------------------------|----------|------------------|---------|-----------------|---------------------|-----------|
|                            |          |                  |         | Mass (g)        | Q <sub>10</sub> SMR |           |
| <i>Mugil cephalus</i>      | 221      | 14.5             | 8.0444  |                 |                     | [254]     |
| <i>Mugil cephalus</i>      | 225      | 14.5             | 11.4975 |                 |                     | [254]     |
| <i>Mugil cephalus</i>      | 225      | 28.5             | 30.555  |                 |                     | [254]     |
| <i>Mugil cephalus</i>      | 238      | 14.5             | 8.9964  |                 |                     | [254]     |
| <i>Mugil cephalus</i>      | 259      | 14.5             | 12.8723 | 156.2548        | 32.0902             | [254]     |
| <i>Mugil curema</i>        | 140      | 20               | 9.8     |                 |                     | [254]     |
| <i>Mugil curema</i>        | 140      | 20               | 10.682  |                 |                     | [254]     |
| <i>Mugil curema</i>        | 140      | 20               | 14.112  |                 |                     | [254]     |
| <i>Mugil curema</i>        | 140      | 20               | 15.778  | 140             | 30.34758            | [254]     |
| <i>Mystus cavasius</i>     | 4        | 29               | 2.0048  |                 |                     | [254]     |
| <i>Mystus cavasius</i>     | 7        | 29               | 1.6317  |                 |                     | [254]     |
| <i>Mystus cavasius</i>     | 9        | 29               | 2.5137  |                 |                     | [254]     |
| <i>Mystus cavasius</i>     | 14       | 29               | 3.0184  |                 |                     | [254]     |
| <i>Mystus cavasius</i>     | 15       | 29               | 2.73    |                 |                     | [254]     |
| <i>Mystus cavasius</i>     | 19       | 29               | 2.793   |                 |                     | [254]     |
| <i>Mystus cavasius</i>     | 24       | 29               | 3.2424  |                 |                     | [254]     |
| <i>Mystus cavasius</i>     | 25       | 29               | 3.9375  |                 |                     | [254]     |
| <i>Mystus cavasius</i>     | 33       | 29               | 5.4516  |                 |                     | [254]     |
| <i>Mystus cavasius</i>     | 35       | 29               | 5.978   |                 |                     | [254]     |
| <i>Mystus cavasius</i>     | 37       | 29               | 5.8016  |                 |                     | [254]     |
| <i>Mystus cavasius</i>     | 42       | 29               | 8.5848  |                 |                     | [254]     |
| <i>Mystus cavasius</i>     | 45       | 29               | 5.7015  |                 |                     | [254]     |
| <i>Mystus cavasius</i>     | 47       | 29               | 7.1064  |                 |                     | [254]     |
| <i>Mystus cavasius</i>     | 52       | 29               | 7.5712  |                 |                     | [254]     |
| <i>Mystus cavasius</i>     | 53       | 29               | 8.8298  |                 |                     | [254]     |
| <i>Mystus cavasius</i>     | 56       | 29               | 9.6432  | 24.27707        | 6.962993            | [254]     |
| <i>Myxine glutinosa</i>    | 38.4     | 7                | 1.29024 |                 |                     | [254]     |
| <i>Myxine glutinosa</i>    | 38.4     | 15               | 1.85472 | 38.4            | 5.954438            | [254]     |
| <i>Oncorhynchus mykiss</i> | 100      | 5                | 3.78    |                 |                     | [254]     |
| <i>Oncorhynchus mykiss</i> | 100      | 5                | 3.92    |                 |                     | [254]     |

| Species                    | Mass (g) | Temperature (°C) | MR      | Species Average |                     | Reference |
|----------------------------|----------|------------------|---------|-----------------|---------------------|-----------|
|                            |          |                  |         | Mass (g)        | Q <sub>10</sub> SMR |           |
| <i>Oncorhynchus mykiss</i> | 100      | 5                | 3.99    |                 |                     | [254]     |
| <i>Oncorhynchus mykiss</i> | 100      | 5                | 4.13    |                 |                     | [254]     |
| <i>Oncorhynchus mykiss</i> | 100      | 5                | 4.2     |                 |                     | [254]     |
| <i>Oncorhynchus mykiss</i> | 100      | 5                | 4.34    |                 |                     | [254]     |
| <i>Oncorhynchus mykiss</i> | 100      | 5                | 4.55    |                 |                     | [254]     |
| <i>Oncorhynchus mykiss</i> | 100      | 5                | 5.18    |                 |                     | [254]     |
| <i>Oncorhynchus mykiss</i> | 100      | 15               | 3.57    |                 |                     | [254]     |
| <i>Oncorhynchus mykiss</i> | 100      | 15               | 3.99    |                 |                     | [254]     |
| <i>Oncorhynchus mykiss</i> | 100      | 15               | 4.48    |                 |                     | [254]     |
| <i>Oncorhynchus mykiss</i> | 100      | 15               | 4.62    |                 |                     | [254]     |
| <i>Oncorhynchus mykiss</i> | 100      | 15               | 4.83    |                 |                     | [254]     |
| <i>Oncorhynchus mykiss</i> | 100      | 15               | 6.58    |                 |                     | [254]     |
| <i>Oncorhynchus mykiss</i> | 100      | 15               | 7.63    |                 |                     | [254]     |
| <i>Oncorhynchus mykiss</i> | 100      | 15               | 7.84    |                 |                     | [254]     |
| <i>Oncorhynchus mykiss</i> | 100      | 15               | 8.89    |                 |                     | [254]     |
| <i>Oncorhynchus mykiss</i> | 115      | 12               | 7.728   |                 |                     | [254]     |
| <i>Oncorhynchus mykiss</i> | 115      | 12               | 8.7745  |                 |                     | [254]     |
| <i>Oncorhynchus mykiss</i> | 115.4    | 14               | 6.54318 |                 |                     | [254]     |
| <i>Oncorhynchus mykiss</i> | 210      | 8.6              | 6.174   |                 |                     | [254]     |
| <i>Oncorhynchus mykiss</i> | 210      | 8.6              | 6.615   |                 |                     | [254]     |
| <i>Oncorhynchus mykiss</i> | 210      | 8.6              | 7.056   |                 |                     | [254]     |
| <i>Oncorhynchus mykiss</i> | 210      | 8.6              | 7.056   |                 |                     | [254]     |
| <i>Oncorhynchus mykiss</i> | 210      | 8.6              | 7.35    |                 |                     | [254]     |
| <i>Oncorhynchus mykiss</i> | 210      | 8.6              | 7.497   |                 |                     | [254]     |
| <i>Oncorhynchus mykiss</i> | 210      | 8.6              | 7.497   |                 |                     | [254]     |
| <i>Oncorhynchus mykiss</i> | 210      | 8.6              | 7.791   |                 |                     | [254]     |
| <i>Oncorhynchus mykiss</i> | 210      | 8.6              | 7.791   |                 |                     | [254]     |
| <i>Oncorhynchus mykiss</i> | 210      | 8.6              | 7.938   |                 |                     | [254]     |
| <i>Oncorhynchus mykiss</i> | 210      | 8.6              | 8.085   |                 |                     | [254]     |
| <i>Oncorhynchus mykiss</i> | 210      | 8.6              | 8.526   |                 |                     | [254]     |

| Species                    | Mass (g) | Temperature (°C) | MR      | Species Average |                     | Reference |
|----------------------------|----------|------------------|---------|-----------------|---------------------|-----------|
|                            |          |                  |         | Mass (g)        | Q <sub>10</sub> SMR |           |
| <i>Oncorhynchus mykiss</i> | 210      | 8.6              | 8.82    |                 |                     | [254]     |
| <i>Oncorhynchus mykiss</i> | 210      | 8.6              | 8.967   |                 |                     | [254]     |
| <i>Oncorhynchus mykiss</i> | 210      | 8.6              | 9.408   |                 |                     | [254]     |
| <i>Oncorhynchus mykiss</i> | 210      | 8.6              | 9.555   |                 |                     | [254]     |
| <i>Oncorhynchus mykiss</i> | 210      | 8.6              | 10.143  |                 |                     | [254]     |
| <i>Oncorhynchus mykiss</i> | 210      | 8.6              | 11.172  |                 |                     | [254]     |
| <i>Oncorhynchus mykiss</i> | 217      | 8.6              | 8.5064  |                 |                     | [254]     |
| <i>Oncorhynchus mykiss</i> | 218      | 12               | 6.867   |                 |                     | [254]     |
| <i>Oncorhynchus mykiss</i> | 219      | 8                | 11.4975 |                 |                     | [254]     |
| <i>Oncorhynchus mykiss</i> | 224      | 8                | 11.1328 |                 |                     | [254]     |
| <i>Oncorhynchus mykiss</i> | 225      | 15               | 14.805  |                 |                     | [254]     |
| <i>Oncorhynchus mykiss</i> | 225      | 15               | 14.805  |                 |                     | [254]     |
| <i>Oncorhynchus mykiss</i> | 225      | 15               | 15.2775 |                 |                     | [254]     |
| <i>Oncorhynchus mykiss</i> | 225      | 15               | 16.2225 |                 |                     | [254]     |
| <i>Oncorhynchus mykiss</i> | 225      | 15               | 17.7975 |                 |                     | [254]     |
| <i>Oncorhynchus mykiss</i> | 238      | 8                | 11.9952 |                 |                     | [254]     |
| <i>Oncorhynchus mykiss</i> | 265      | 8.8              | 7.9765  |                 |                     | [254]     |
| <i>Oncorhynchus mykiss</i> | 288      | 15               | 15.9264 |                 |                     | [254]     |
| <i>Oncorhynchus mykiss</i> | 300      | 15               | 17.43   |                 |                     | [254]     |
| <i>Oncorhynchus mykiss</i> | 350      | 10               | 16.905  |                 |                     | [254]     |
| <i>Oncorhynchus mykiss</i> | 350      | 10               | 20.335  |                 |                     | [254]     |
| <i>Oncorhynchus mykiss</i> | 350      | 10               | 21.315  |                 |                     | [254]     |
| <i>Oncorhynchus mykiss</i> | 350      | 10               | 22.54   |                 |                     | [254]     |
| <i>Oncorhynchus mykiss</i> | 350      | 10               | 24.745  |                 |                     | [254]     |
| <i>Oncorhynchus mykiss</i> | 350      | 10               | 26.705  |                 |                     | [254]     |
| <i>Oncorhynchus mykiss</i> | 450      | 5                | 12.285  |                 |                     | [254]     |
| <i>Oncorhynchus mykiss</i> | 500      | 13.5             | 19.6    |                 |                     | [254]     |
| <i>Oncorhynchus mykiss</i> | 500      | 13.5             | 21.35   |                 |                     | [254]     |
| <i>Oncorhynchus mykiss</i> | 500      | 13.5             | 22.05   |                 |                     | [254]     |
| <i>Oncorhynchus mykiss</i> | 500      | 13.5             | 23.1    |                 |                     | [254]     |

| Species                    | Mass (g) | Temperature (°C) | MR       | Species Average |                     | Reference |
|----------------------------|----------|------------------|----------|-----------------|---------------------|-----------|
|                            |          |                  |          | Mass (g)        | Q <sub>10</sub> SMR |           |
| <i>Oncorhynchus mykiss</i> | 500      | 13.5             | 30.1     |                 |                     | [254]     |
| <i>Oncorhynchus mykiss</i> | 500      | 15               | 24.85    |                 |                     | [254]     |
| <i>Oncorhynchus mykiss</i> | 500      | 15               | 24.85    |                 |                     | [254]     |
| <i>Oncorhynchus mykiss</i> | 500      | 15               | 25.2     |                 |                     | [254]     |
| <i>Oncorhynchus mykiss</i> | 515      | 16               | 39.655   |                 |                     | [254]     |
| <i>Oncorhynchus mykiss</i> | 515      | 18               | 45.0625  |                 |                     | [254]     |
| <i>Oncorhynchus mykiss</i> | 515      | 20               | 54.075   |                 |                     | [254]     |
| <i>Oncorhynchus mykiss</i> | 515      | 22               | 75.705   |                 |                     | [254]     |
| <i>Oncorhynchus mykiss</i> | 515      | 24               | 106.3475 |                 |                     | [254]     |
| <i>Oncorhynchus mykiss</i> | 515      | 25               | 97.335   |                 |                     | [254]     |
| <i>Oncorhynchus mykiss</i> | 515      | 26               | 99.1375  |                 |                     | [254]     |
| <i>Oncorhynchus mykiss</i> | 565      | 15               | 33.6175  |                 |                     | [254]     |
| <i>Oncorhynchus mykiss</i> | 595      | 15               | 31.2375  |                 |                     | [254]     |
| <i>Oncorhynchus mykiss</i> | 700      | 15               | 38.71    |                 |                     | [254]     |
| <i>Oncorhynchus mykiss</i> | 768      | 15               | 52.1472  |                 |                     | [254]     |
| <i>Oncorhynchus mykiss</i> | 768      | 15               | 58.0608  |                 |                     | [254]     |
| <i>Oncorhynchus mykiss</i> | 768      | 15               | 66.1248  |                 |                     | [254]     |
| <i>Oncorhynchus mykiss</i> | 768      | 15               | 67.2     |                 |                     | [254]     |
| <i>Oncorhynchus mykiss</i> | 1200     | 10               | 40.32    | 250.6945        | 49.20727            | [254]     |
| <i>Oncorhynchus nerka</i>  | 3.38     | 15               | 0.54418  |                 |                     | [254]     |
| <i>Oncorhynchus nerka</i>  | 8.47     | 15               | 0.65219  |                 |                     | [254]     |
| <i>Oncorhynchus nerka</i>  | 19.1     | 15               | 1.69799  |                 |                     | [254]     |
| <i>Oncorhynchus nerka</i>  | 32.9     | 10               | 1.3818   |                 |                     | [254]     |
| <i>Oncorhynchus nerka</i>  | 36.7     | 5                | 1.05329  |                 |                     | [254]     |
| <i>Oncorhynchus nerka</i>  | 52.2     | 25               | 7.16184  |                 |                     | [254]     |
| <i>Oncorhynchus nerka</i>  | 55.2     | 15               | 2.74344  |                 |                     | [254]     |
| <i>Oncorhynchus nerka</i>  | 62.6     | 20               | 5.2584   |                 |                     | [254]     |
| <i>Oncorhynchus nerka</i>  | 100      | 15               | 5.81     |                 |                     | [254]     |
| <i>Oncorhynchus nerka</i>  | 264      | 10.5             | 15.5232  |                 |                     | [254]     |
| <i>Oncorhynchus nerka</i>  | 746      | 15               | 37.0762  |                 |                     | [254]     |

| Species                                | Mass (g) | Temperature (°C) | MR      | Species Average |                     | Reference |
|----------------------------------------|----------|------------------|---------|-----------------|---------------------|-----------|
|                                        |          |                  |         | Mass (g)        | Q <sub>10</sub> SMR |           |
| <i>Oncorhynchus nerka</i>              | 1432     | 15               | 44.1056 | 62.20812        | 12.60683            | [254]     |
| <i>Ophiodon elongatus</i>              | 270      | 12.2             | 11.718  |                 |                     | [254]     |
| <i>Ophiodon elongatus</i>              | 520      | 13.1             | 21.84   |                 |                     | [254]     |
| <i>Ophiodon elongatus</i>              | 850      | 13.2             | 32.725  |                 |                     | [254]     |
| <i>Ophiodon elongatus</i>              | 970      | 12               | 37.345  |                 |                     | [254]     |
| <i>Ophiodon elongatus</i>              | 1500     | 13               | 57.75   |                 |                     | [254]     |
| <i>Ophiodon elongatus</i>              | 1591     | 12.1             | 27.8425 |                 |                     | [254]     |
| <i>Ophiodon elongatus</i>              | 1720     | 12.1             | 32.508  |                 |                     | [254]     |
| <i>Ophiodon elongatus</i>              | 2090     | 12               | 45.353  |                 |                     | [254]     |
| <i>Ophiodon elongatus</i>              | 3400     | 10               | 76.16   |                 |                     | [254]     |
| <i>Ophiodon elongatus</i>              | 3770     | 12.4             | 116.116 |                 |                     | [254]     |
| <i>Ophiodon elongatus</i>              | 4400     | 13               | 98.56   |                 |                     | [254]     |
| <i>Ophiodon elongatus</i>              | 6820     | 12               | 152.768 |                 |                     | [254]     |
| <i>Ophiodon elongatus</i>              | 7330     | 11.8             | 153.93  |                 |                     | [254]     |
| <i>Ophiodon elongatus</i>              | 9090     | 12               | 229.068 | 2063.926        | 205.1988            | [254]     |
| <i>Oreochromis aureus</i>              | 697      | 26               | 32.2014 |                 |                     | [254]     |
| <i>Oreochromis niloticus niloticus</i> | 80       | 25               | 5.824   |                 |                     | [254]     |
| <i>Oreochromis niloticus niloticus</i> | 80       | 25               | 7.504   |                 |                     | [254]     |
| <i>Oreochromis niloticus niloticus</i> | 310      | 26               | 12.369  | 192.8384        | 21.43798            | [254]     |
| <i>Orthodon microlepidotus</i>         | 564      | 10               | 16.5816 |                 |                     | [254]     |
| <i>Orthodon microlepidotus</i>         | 574      | 25               | 56.252  |                 |                     | [254]     |
| <i>Orthodon microlepidotus</i>         | 583      | 30               | 77.9471 |                 |                     | [254]     |
| <i>Orthodon microlepidotus</i>         | 588      | 20               | 40.7484 |                 |                     | [254]     |
| <i>Orthodon microlepidotus</i>         | 650      | 12               | 14.56   |                 |                     | [254]     |
| <i>Orthodon microlepidotus</i>         | 650      | 20               | 40.95   |                 |                     | [254]     |
| <i>Orthodon microlepidotus</i>         | 650      | 28               | 56.875  |                 |                     | [254]     |
| <i>Orthodon microlepidotus</i>         | 678      | 15               | 37.0188 | 615.7449        | 91.52684            | [254]     |
| <i>Petromyzon marinus</i>              | 22.8     | 5                | 0.84588 |                 |                     | [254]     |
| <i>Petromyzon marinus</i>              | 34.8     | 10               | 1.5834  |                 |                     | [254]     |
| <i>Petromyzon marinus</i>              | 35.7     | 15               | 2.87385 |                 |                     | [254]     |

| Species                      | Mass (g) | Temperature (°C) | MR       | Species Average |                     | Reference |
|------------------------------|----------|------------------|----------|-----------------|---------------------|-----------|
|                              |          |                  |          | Mass (g)        | Q <sub>10</sub> SMR |           |
| <i>Petromyzon marinus</i>    | 75.6     | 20               | 6.56208  | 38.25393        | 8.006584            | [254]     |
| <i>Platichthys flesus</i>    | 350      | 9                | 2.94     |                 |                     | [254]     |
| <i>Platichthys flesus</i>    | 350      | 9                | 4.9      |                 |                     | [254]     |
| <i>Platichthys flesus</i>    | 350      | 9                | 9.555    |                 |                     | [254]     |
| <i>Platichthys flesus</i>    | 395      | 15               | 10.2305  |                 |                     | [254]     |
| <i>Platichthys flesus</i>    | 434      | 5                | 5.4684   |                 |                     | [254]     |
| <i>Platichthys flesus</i>    | 494      | 10               | 15.561   | 392.0454        | 29.12828            | [254]     |
| <i>Platichthys stellatus</i> | 580.8    | 9                | 15.85584 |                 |                     | [254]     |
| <i>Platichthys stellatus</i> | 685.3    | 9                | 18.22898 |                 |                     | [254]     |
| <i>Platichthys stellatus</i> | 1175     | 11.2             | 27.1425  |                 |                     | [254]     |
| <i>Platichthys stellatus</i> | 1175     | 11.5             | 25.4975  |                 |                     | [254]     |
| <i>Platichthys stellatus</i> | 1175     | 20               | 69.09    |                 |                     | [254]     |
| <i>Platichthys stellatus</i> | 1200     | 11.4             | 17.64    |                 |                     | [254]     |
| <i>Platichthys stellatus</i> | 1200     | 19.8             | 61.32    |                 |                     | [254]     |
| <i>Platichthys stellatus</i> | 1268     | 9                | 29.2908  |                 |                     | [254]     |
| <i>Platichthys stellatus</i> | 1268     | 9.5              | 31.066   |                 |                     | [254]     |
| <i>Platichthys stellatus</i> | 1268     | 17.8             | 56.8064  |                 |                     | [254]     |
| <i>Platichthys stellatus</i> | 1290     | 9                | 14.448   |                 |                     | [254]     |
| <i>Platichthys stellatus</i> | 1290     | 9                | 21.672   |                 |                     | [254]     |
| <i>Platichthys stellatus</i> | 1290     | 16.6             | 35.217   |                 |                     | [254]     |
| <i>Platichthys stellatus</i> | 1425     | 11               | 28.9275  |                 |                     | [254]     |
| <i>Platichthys stellatus</i> | 1425     | 11               | 41.895   |                 |                     | [254]     |
| <i>Platichthys stellatus</i> | 1440     | 12.3             | 53.424   |                 |                     | [254]     |
| <i>Platichthys stellatus</i> | 1440     | 13               | 45.36    |                 |                     | [254]     |
| <i>Platichthys stellatus</i> | 1440     | 19.8             | 88.704   |                 |                     | [254]     |
| <i>Platichthys stellatus</i> | 1450     | 11.8             | 17.255   |                 |                     | [254]     |
| <i>Platichthys stellatus</i> | 1450     | 19.5             | 92.365   |                 |                     | [254]     |
| <i>Platichthys stellatus</i> | 1475     | 10.2             | 47.495   |                 |                     | [254]     |
| <i>Platichthys stellatus</i> | 1475     | 11.5             | 33.04    | 1239.646        | 119.9218            | [254]     |
| <i>Pleuronectes platessa</i> | 27       | 10               | 2.4003   |                 |                     | [254]     |

| Species                                | Mass (g) | Temperature (°C) | MR      | Species Average |                     | Reference |
|----------------------------------------|----------|------------------|---------|-----------------|---------------------|-----------|
|                                        |          |                  |         | Mass (g)        | Q <sub>10</sub> SMR |           |
| <i>Pleuronectes platessa</i>           | 27       | 20               | 3.1752  |                 |                     | [254]     |
| <i>Pleuronectes platessa</i>           | 92       | 20               | 4.7012  |                 |                     | [254]     |
| <i>Pleuronectes platessa</i>           | 105      | 15               | 4.704   |                 |                     | [254]     |
| <i>Pleuronectes platessa</i>           | 106      | 20               | 4.6746  |                 |                     | [254]     |
| <i>Pleuronectes platessa</i>           | 110      | 10               | 3.465   |                 |                     | [254]     |
| <i>Pleuronectes platessa</i>           | 110      | 15               | 5.005   |                 |                     | [254]     |
| <i>Pleuronectes platessa</i>           | 110      | 20               | 10.01   |                 |                     | [254]     |
| <i>Pleuronectes platessa</i>           | 120      | 10               | 3.108   |                 |                     | [254]     |
| <i>Pleuronectes platessa</i>           | 120      | 10               | 4.284   |                 |                     | [254]     |
| <i>Pleuronectes platessa</i>           | 120      | 15               | 5.46    |                 |                     | [254]     |
| <i>Pleuronectes platessa</i>           | 124      | 10               | 2.7776  |                 |                     | [254]     |
| <i>Pleuronectes platessa</i>           | 127      | 10               | 3.6449  |                 |                     | [254]     |
| <i>Pleuronectes platessa</i>           | 130      | 20               | 7.735   |                 |                     | [254]     |
| <i>Pleuronectes platessa</i>           | 132      | 20               | 8.8704  |                 |                     | [254]     |
| <i>Pleuronectes platessa</i>           | 150      | 10               | 4.305   |                 |                     | [254]     |
| <i>Pleuronectes platessa</i>           | 158      | 10               | 4.977   |                 |                     | [254]     |
| <i>Pleuronectes platessa</i>           | 164      | 10               | 5.5104  |                 |                     | [254]     |
| <i>Pleuronectes platessa</i>           | 186      | 10               | 5.4684  |                 |                     | [254]     |
| <i>Pleuronectes platessa</i>           | 281      | 15               | 10.0317 |                 |                     | [254]     |
| <i>Pleuronectes platessa</i>           | 288.6    | 5                | 4.0404  |                 |                     | [254]     |
| <i>Pleuronectes platessa</i>           | 294      | 10               | 8.4378  |                 |                     | [254]     |
| <i>Pleuronectes platessa</i>           | 322      | 10               | 8.5652  |                 |                     | [254]     |
| <i>Pleuronectes platessa</i>           | 383      | 10               | 8.8473  |                 |                     | [254]     |
| <i>Pleuronectes platessa</i>           | 572      | 10               | 13.2132 |                 |                     | [254]     |
| <i>Pleuronectes platessa</i>           | 632      | 10               | 20.7928 | 149.6514        | 19.70495            | [254]     |
| <i>Protopterus annectens annectens</i> | 80       | 30               | 8.736   |                 |                     | [254]     |
| <i>Protopterus annectens annectens</i> | 107      | 30               | 11.4597 |                 |                     | [254]     |
| <i>Protopterus annectens annectens</i> | 107      | 30               | 12.5832 |                 |                     | [254]     |
| <i>Protopterus annectens annectens</i> | 107      | 30               | 12.8079 |                 |                     | [254]     |
| <i>Protopterus annectens annectens</i> | 212      | 30               | 19.4404 |                 |                     | [254]     |

| Species                                | Mass (g) | Temperature (°C) | MR       | Species Average |                     | Reference |
|----------------------------------------|----------|------------------|----------|-----------------|---------------------|-----------|
|                                        |          |                  |          | Mass (g)        | Q <sub>10</sub> SMR |           |
| <i>Protopterus annectens annectens</i> | 212      | 30               | 23.5956  |                 |                     | [254]     |
| <i>Protopterus annectens annectens</i> | 212      | 30               | 24.7828  |                 |                     | [254]     |
| <i>Protopterus annectens annectens</i> | 368      | 30               | 20.608   |                 |                     | [254]     |
| <i>Protopterus annectens annectens</i> | 368      | 30               | 25.2448  |                 |                     | [254]     |
| <i>Protopterus annectens annectens</i> | 368      | 30               | 28.8512  | 184.8329        | 26.14708            | [254]     |
| <i>Pseudopleuronectes americanus</i>   | 11.25    | 12               | 0.354375 |                 |                     | [254]     |
| <i>Pseudopleuronectes americanus</i>   | 11.25    | 12               | 1.134    |                 |                     | [254]     |
| <i>Pseudopleuronectes americanus</i>   | 14.8     | 20               | 1.31572  |                 |                     | [254]     |
| <i>Pseudopleuronectes americanus</i>   | 14.8     | 20               | 2.42424  |                 |                     | [254]     |
| <i>Pseudopleuronectes americanus</i>   | 14.96    | 20               | 1.968736 |                 |                     | [254]     |
| <i>Pseudopleuronectes americanus</i>   | 14.96    | 20               | 3.644256 |                 |                     | [254]     |
| <i>Pseudopleuronectes americanus</i>   | 16.09    | 20               | 1.723239 |                 |                     | [254]     |
| <i>Pseudopleuronectes americanus</i>   | 16.09    | 20               | 2.444071 |                 |                     | [254]     |
| <i>Pseudopleuronectes americanus</i>   | 16.89    | 20               | 1.30053  |                 |                     | [254]     |
| <i>Pseudopleuronectes americanus</i>   | 16.89    | 20               | 4.01982  |                 |                     | [254]     |
| <i>Pseudopleuronectes americanus</i>   | 17.17    | 16               | 2.04323  |                 |                     | [254]     |
| <i>Pseudopleuronectes americanus</i>   | 17.17    | 16               | 2.439857 |                 |                     | [254]     |
| <i>Pseudopleuronectes americanus</i>   | 17.19    | 24               | 3.549735 |                 |                     | [254]     |
| <i>Pseudopleuronectes americanus</i>   | 17.19    | 24               | 4.837266 |                 |                     | [254]     |
| <i>Pseudopleuronectes americanus</i>   | 17.46    | 16               | 1.307754 |                 |                     | [254]     |
| <i>Pseudopleuronectes americanus</i>   | 17.46    | 16               | 3.128832 |                 |                     | [254]     |
| <i>Pseudopleuronectes americanus</i>   | 17.92    | 16               | 2.25792  |                 |                     | [254]     |
| <i>Pseudopleuronectes americanus</i>   | 17.92    | 16               | 3.499776 |                 |                     | [254]     |
| <i>Pseudopleuronectes americanus</i>   | 19.11    | 12               | 0.882882 |                 |                     | [254]     |
| <i>Pseudopleuronectes americanus</i>   | 19.11    | 12               | 1.083537 |                 |                     | [254]     |
| <i>Pseudopleuronectes americanus</i>   | 26.15    | 12               | 0.07322  |                 |                     | [254]     |
| <i>Pseudopleuronectes americanus</i>   | 26.15    | 12               | 1.079995 |                 |                     | [254]     |
| <i>Pseudopleuronectes americanus</i>   | 27.41    | 20               | 1.746017 |                 |                     | [254]     |
| <i>Pseudopleuronectes americanus</i>   | 27.41    | 20               | 4.79675  |                 |                     | [254]     |
| <i>Pseudopleuronectes americanus</i>   | 30.18    | 12               | 0.338016 |                 |                     | [254]     |



| Species                              | Mass (g) | Temperature (°C) | MR       | Species Average |                     | Reference |
|--------------------------------------|----------|------------------|----------|-----------------|---------------------|-----------|
|                                      |          |                  |          | Mass (g)        | Q <sub>10</sub> SMR |           |
| <i>Pseudopleuronectes americanus</i> | 30.18    | 12               | 0.63378  |                 |                     | [254]     |
| <i>Pseudopleuronectes americanus</i> | 32.63    | 20               | 3.220581 |                 |                     | [254]     |
| <i>Pseudopleuronectes americanus</i> | 32.63    | 20               | 5.139225 |                 |                     | [254]     |
| <i>Pseudopleuronectes americanus</i> | 34.12    | 16               | 1.67188  |                 |                     | [254]     |
| <i>Pseudopleuronectes americanus</i> | 34.12    | 16               | 3.176572 |                 |                     | [254]     |
| <i>Pseudopleuronectes americanus</i> | 35.48    | 24               | 6.680884 |                 |                     | [254]     |
| <i>Pseudopleuronectes americanus</i> | 35.48    | 24               | 11.62325 |                 |                     | [254]     |
| <i>Pseudopleuronectes americanus</i> | 39.48    | 16               | 1.464708 |                 |                     | [254]     |
| <i>Pseudopleuronectes americanus</i> | 39.48    | 16               | 4.255944 |                 |                     | [254]     |
| <i>Pseudopleuronectes americanus</i> | 42.5     | 24               | 9.3415   |                 |                     | [254]     |
| <i>Pseudopleuronectes americanus</i> | 42.5     | 24               | 10.73975 |                 |                     | [254]     |
| <i>Pseudopleuronectes americanus</i> | 43.18    | 12               | 0.695198 |                 |                     | [254]     |
| <i>Pseudopleuronectes americanus</i> | 43.18    | 12               | 0.816102 |                 |                     | [254]     |
| <i>Pseudopleuronectes americanus</i> | 48.66    | 12               | 0.17031  |                 |                     | [254]     |
| <i>Pseudopleuronectes americanus</i> | 48.66    | 12               | 1.87341  |                 |                     | [254]     |
| <i>Pseudopleuronectes americanus</i> | 51.86    | 16               | 3.339784 |                 |                     | [254]     |
| <i>Pseudopleuronectes americanus</i> | 51.86    | 16               | 7.405608 |                 |                     | [254]     |
| <i>Pseudopleuronectes americanus</i> | 54.06    | 20               | 7.530558 |                 |                     | [254]     |
| <i>Pseudopleuronectes americanus</i> | 54.06    | 20               | 9.574026 |                 |                     | [254]     |
| <i>Pseudopleuronectes americanus</i> | 55.03    | 16               | 3.890621 |                 |                     | [254]     |
| <i>Pseudopleuronectes americanus</i> | 55.03    | 16               | 7.473074 |                 |                     | [254]     |
| <i>Pseudopleuronectes americanus</i> | 55.97    | 24               | 9.873108 |                 |                     | [254]     |
| <i>Pseudopleuronectes americanus</i> | 55.97    | 24               | 13.16414 |                 |                     | [254]     |
| <i>Pseudopleuronectes americanus</i> | 56.88    | 24               | 8.122464 |                 |                     | [254]     |
| <i>Pseudopleuronectes americanus</i> | 56.88    | 24               | 16.20511 |                 |                     | [254]     |
| <i>Pseudopleuronectes americanus</i> | 568      | 20               | 31.0128  |                 |                     | [254]     |
| <i>Pseudopleuronectes americanus</i> | 634      | 15               | 19.5272  |                 |                     | [254]     |
| <i>Pseudopleuronectes americanus</i> | 635      | 10               | 14.6685  |                 |                     | [254]     |
| <i>Pseudopleuronectes americanus</i> | 681      | 15               | 25.7418  |                 |                     | [254]     |
| <i>Pseudopleuronectes americanus</i> | 696      | 5                | 10.2312  |                 |                     | [254]     |

| Species                              | Mass (g) | Temperature (°C) | MR       | Species Average |                     | Reference |
|--------------------------------------|----------|------------------|----------|-----------------|---------------------|-----------|
|                                      |          |                  |          | Mass (g)        | Q <sub>10</sub> SMR |           |
| <i>Pseudopleuronectes americanus</i> | 716      | 10               | 17.0408  | 39.45973        | 8.686477            | [254]     |
| <i>Rhinogobiops nicholsii</i>        | 0.57     | 15               | 0.061047 |                 |                     | [254]     |
| <i>Rhinogobiops nicholsii</i>        | 0.78     | 15               | 0.0546   |                 |                     | [254]     |
| <i>Rhinogobiops nicholsii</i>        | 0.93     | 15               | 0.068355 |                 |                     | [254]     |
| <i>Rhinogobiops nicholsii</i>        | 1.39     | 15               | 0.083678 |                 |                     | [254]     |
| <i>Rhinogobiops nicholsii</i>        | 1.58     | 15               | 0.085162 |                 |                     | [254]     |
| <i>Rhinogobiops nicholsii</i>        | 1.82     | 15               | 0.08281  |                 |                     | [254]     |
| <i>Rhinogobiops nicholsii</i>        | 1.93     | 15               | 0.098623 |                 |                     | [254]     |
| <i>Rhinogobiops nicholsii</i>        | 2.93     | 15               | 0.159978 |                 |                     | [254]     |
| <i>Rhinogobiops nicholsii</i>        | 3.59     | 15               | 0.168371 |                 |                     | [254]     |
| <i>Rhinogobiops nicholsii</i>        | 3.8      | 15               | 0.17556  |                 |                     | [254]     |
| <i>Rhinogobiops nicholsii</i>        | 3.91     | 15               | 0.166957 |                 |                     | [254]     |
| <i>Rhinogobiops nicholsii</i>        | 4.08     | 15               | 0.179928 | 1.886664        | 0.332324            | [254]     |
| <i>Salmo salar</i>                   | 26.9     | 6                | 1.43108  |                 |                     | [254]     |
| <i>Salmo salar</i>                   | 26.9     | 18               | 3.9543   |                 |                     | [254]     |
| <i>Salmo salar</i>                   | 227      | 15               | 17.6379  | 54.76589        | 16.15844            | [254]     |
| <i>Salmo trutta fario</i>            | 100      | 10               | 5.6      |                 |                     | [254]     |
| <i>Salmo trutta fario</i>            | 350      | 10               | 14.21    |                 |                     | [254]     |
| <i>Salmo trutta fario</i>            | 350      | 10               | 23.275   | 230.5218        | 49.69018            | [254]     |
| <i>Salmo trutta trutta</i>           | 135      | 10               | 5.9535   |                 |                     | [254]     |
| <i>Salmo trutta trutta</i>           | 190      | 10               | 8.911    |                 |                     | [254]     |
| <i>Salmo trutta trutta</i>           | 214      | 10               | 12.1338  |                 |                     | [254]     |
| <i>Salmo trutta trutta</i>           | 216      | 10               | 12.2472  |                 |                     | [254]     |
| <i>Salmo trutta trutta</i>           | 340      | 10               | 12.614   |                 |                     | [254]     |
| <i>Salmo trutta trutta</i>           | 430      | 10               | 19.866   |                 |                     | [254]     |
| <i>Salmo trutta trutta</i>           | 435      | 10               | 15.225   |                 |                     | [254]     |
| <i>Salmo trutta trutta</i>           | 443      | 10               | 16.1252  |                 |                     | [254]     |
| <i>Salmo trutta trutta</i>           | 453      | 10               | 17.1234  |                 |                     | [254]     |
| <i>Salmo trutta trutta</i>           | 485      | 10               | 18.333   |                 |                     | [254]     |
| <i>Salmo trutta trutta</i>           | 565      | 10               | 24.1255  |                 |                     | [254]     |

| Species                      | Mass (g) | Temperature (°C) | MR      | Species Average |                     | Reference |
|------------------------------|----------|------------------|---------|-----------------|---------------------|-----------|
|                              |          |                  |         | Mass (g)        | Q <sub>10</sub> SMR |           |
| <i>Salmo trutta trutta</i>   | 565      | 10               | 34.804  |                 |                     | [254]     |
| <i>Salmo trutta trutta</i>   | 575      | 10               | 17.71   |                 |                     | [254]     |
| <i>Salmo trutta trutta</i>   | 575      | 10               | 38.2375 |                 |                     | [254]     |
| <i>Salmo trutta trutta</i>   | 600      | 10               | 21.84   |                 |                     | [254]     |
| <i>Salmo trutta trutta</i>   | 605      | 10               | 22.022  |                 |                     | [254]     |
| <i>Salmo trutta trutta</i>   | 615      | 10               | 24.108  | 400.1533        | 69.57267            | [254]     |
| <i>Salvelinus alpinus</i>    | 210      | 15               | 11.76   | 210             | 37.07257            | [254]     |
| <i>Salvelinus fontinalis</i> | 5        | 5                | 0.1715  |                 |                     | [254]     |
| <i>Salvelinus fontinalis</i> | 5        | 5                | 0.189   |                 |                     | [254]     |
| <i>Salvelinus fontinalis</i> | 5        | 10               | 0.3605  |                 |                     | [254]     |
| <i>Salvelinus fontinalis</i> | 5        | 10               | 0.3745  |                 |                     | [254]     |
| <i>Salvelinus fontinalis</i> | 5        | 15               | 0.539   |                 |                     | [254]     |
| <i>Salvelinus fontinalis</i> | 5        | 15               | 0.602   |                 |                     | [254]     |
| <i>Salvelinus fontinalis</i> | 5        | 20               | 0.679   |                 |                     | [254]     |
| <i>Salvelinus fontinalis</i> | 5        | 20               | 0.707   |                 |                     | [254]     |
| <i>Salvelinus fontinalis</i> | 15       | 5                | 0.483   |                 |                     | [254]     |
| <i>Salvelinus fontinalis</i> | 15       | 10               | 0.9555  |                 |                     | [254]     |
| <i>Salvelinus fontinalis</i> | 15       | 15               | 1.3755  |                 |                     | [254]     |
| <i>Salvelinus fontinalis</i> | 15       | 20               | 1.7325  |                 |                     | [254]     |
| <i>Salvelinus fontinalis</i> | 45       | 5                | 1.26    |                 |                     | [254]     |
| <i>Salvelinus fontinalis</i> | 45       | 10               | 2.457   |                 |                     | [254]     |
| <i>Salvelinus fontinalis</i> | 45       | 15               | 3.465   |                 |                     | [254]     |
| <i>Salvelinus fontinalis</i> | 45       | 20               | 4.1895  |                 |                     | [254]     |
| <i>Salvelinus fontinalis</i> | 64       | 15               | 4.8384  |                 |                     | [254]     |
| <i>Salvelinus fontinalis</i> | 102      | 10               | 5.712   |                 |                     | [254]     |
| <i>Salvelinus fontinalis</i> | 112      | 20               | 11.5248 |                 |                     | [254]     |
| <i>Salvelinus fontinalis</i> | 128      | 15               | 5.1968  |                 |                     | [254]     |
| <i>Salvelinus fontinalis</i> | 135      | 5                | 3.213   |                 |                     | [254]     |
| <i>Salvelinus fontinalis</i> | 135      | 5                | 3.78    |                 |                     | [254]     |
| <i>Salvelinus fontinalis</i> | 135      | 10               | 6.237   |                 |                     | [254]     |

| Species                      | Mass (g) | Temperature (°C) | MR       | Species Average |                     | Reference |
|------------------------------|----------|------------------|----------|-----------------|---------------------|-----------|
|                              |          |                  |          | Mass (g)        | Q <sub>10</sub> SMR |           |
| <i>Salvelinus fontinalis</i> | 135      | 10               | 7.0875   |                 |                     | [254]     |
| <i>Salvelinus fontinalis</i> | 135      | 15               | 8.883    |                 |                     | [254]     |
| <i>Salvelinus fontinalis</i> | 135      | 15               | 9.7335   |                 |                     | [254]     |
| <i>Salvelinus fontinalis</i> | 135      | 20               | 10.017   |                 |                     | [254]     |
| <i>Salvelinus fontinalis</i> | 135      | 20               | 11.34    |                 |                     | [254]     |
| <i>Salvelinus fontinalis</i> | 150      | 15               | 9.45     |                 |                     | [254]     |
| <i>Salvelinus fontinalis</i> | 150      | 15               | 9.555    |                 |                     | [254]     |
| <i>Salvelinus fontinalis</i> | 187.5    | 10               | 10.10625 |                 |                     | [254]     |
| <i>Salvelinus fontinalis</i> | 405      | 5                | 8.2215   |                 |                     | [254]     |
| <i>Salvelinus fontinalis</i> | 405      | 10               | 15.0255  |                 |                     | [254]     |
| <i>Salvelinus fontinalis</i> | 405      | 15               | 21.546   |                 |                     | [254]     |
| <i>Salvelinus fontinalis</i> | 405      | 20               | 24.381   |                 |                     | [254]     |
| <i>Salvelinus fontinalis</i> | 413      | 10               | 16.1896  |                 |                     | [254]     |
| <i>Salvelinus fontinalis</i> | 510      | 10               | 19.992   |                 |                     | [254]     |
| <i>Salvelinus fontinalis</i> | 650      | 10               | 32.76    |                 |                     | [254]     |
| <i>Salvelinus fontinalis</i> | 690      | 10               | 10.626   |                 |                     | [254]     |
| <i>Salvelinus fontinalis</i> | 690      | 10               | 20.769   |                 |                     | [254]     |
| <i>Salvelinus fontinalis</i> | 800      | 10               | 43.12    |                 |                     | [254]     |
| <i>Salvelinus fontinalis</i> | 800      | 10               | 50.96    |                 |                     | [254]     |
| <i>Salvelinus fontinalis</i> | 810      | 10               | 26.649   |                 |                     | [254]     |
| <i>Salvelinus fontinalis</i> | 830      | 10               | 34.279   |                 |                     | [254]     |
| <i>Salvelinus fontinalis</i> | 858      | 10               | 37.8378  |                 |                     | [254]     |
| <i>Salvelinus fontinalis</i> | 893      | 10               | 28.7546  |                 |                     | [254]     |
| <i>Salvelinus fontinalis</i> | 945      | 10               | 41.013   |                 |                     | [254]     |
| <i>Salvelinus fontinalis</i> | 965      | 10               | 47.9605  |                 |                     | [254]     |
| <i>Salvelinus fontinalis</i> | 985      | 10               | 31.717   |                 |                     | [254]     |
| <i>Salvelinus fontinalis</i> | 1000     | 5                | 17.5     |                 |                     | [254]     |
| <i>Salvelinus fontinalis</i> | 1000     | 5                | 18.9     |                 |                     | [254]     |
| <i>Salvelinus fontinalis</i> | 1000     | 10               | 33.6     |                 |                     | [254]     |
| <i>Salvelinus fontinalis</i> | 1000     | 10               | 37.1     |                 |                     | [254]     |

| Species                      | Mass (g) | Temperature (°C) | MR      | Species Average |                     | Reference |
|------------------------------|----------|------------------|---------|-----------------|---------------------|-----------|
|                              |          |                  |         | Mass (g)        | Q <sub>10</sub> SMR |           |
| <i>Salvelinus fontinalis</i> | 1000     | 15               | 45.5    |                 |                     | [254]     |
| <i>Salvelinus fontinalis</i> | 1000     | 15               | 49      |                 |                     | [254]     |
| <i>Salvelinus fontinalis</i> | 1000     | 20               | 50.4    |                 |                     | [254]     |
| <i>Salvelinus fontinalis</i> | 1000     | 20               | 55.3    |                 |                     | [254]     |
| <i>Salvelinus fontinalis</i> | 1010     | 10               | 34.643  |                 |                     | [254]     |
| <i>Salvelinus fontinalis</i> | 1140     | 10               | 37.506  |                 |                     | [254]     |
| <i>Salvelinus fontinalis</i> | 1170     | 10               | 80.262  |                 |                     | [254]     |
| <i>Salvelinus fontinalis</i> | 1290     | 10               | 55.083  |                 |                     | [254]     |
| <i>Salvelinus fontinalis</i> | 1300     | 10               | 80.99   |                 |                     | [254]     |
| <i>Salvelinus fontinalis</i> | 1350     | 10               | 65.205  |                 |                     | [254]     |
| <i>Salvelinus fontinalis</i> | 1760     | 10               | 77.616  | 184.2976        | 33.70723            | [254]     |
| <i>Salvelinus namaycush</i>  | 5.8      | 15               | 0.19082 |                 |                     | [254]     |
| <i>Salvelinus namaycush</i>  | 27.7     | 9.1              | 0.62048 |                 |                     | [254]     |
| <i>Salvelinus namaycush</i>  | 27.7     | 9.1              | 0.81438 |                 |                     | [254]     |
| <i>Salvelinus namaycush</i>  | 27.7     | 9.1              | 0.89194 |                 |                     | [254]     |
| <i>Salvelinus namaycush</i>  | 27.7     | 12               | 1.41547 |                 |                     | [254]     |
| <i>Salvelinus namaycush</i>  | 27.7     | 12               | 1.58998 |                 |                     | [254]     |
| <i>Salvelinus namaycush</i>  | 27.7     | 12.3             | 1.41547 |                 |                     | [254]     |
| <i>Salvelinus namaycush</i>  | 27.7     | 13.9             | 1.49303 |                 |                     | [254]     |
| <i>Salvelinus namaycush</i>  | 27.7     | 13.9             | 1.57059 |                 |                     | [254]     |
| <i>Salvelinus namaycush</i>  | 27.7     | 13.9             | 1.7451  |                 |                     | [254]     |
| <i>Salvelinus namaycush</i>  | 27.7     | 13.9             | 2.17168 |                 |                     | [254]     |
| <i>Salvelinus namaycush</i>  | 27.7     | 15.9             | 1.7451  |                 |                     | [254]     |
| <i>Salvelinus namaycush</i>  | 27.7     | 15.9             | 2.3268  |                 |                     | [254]     |
| <i>Salvelinus namaycush</i>  | 27.7     | 16.1             | 1.7451  |                 |                     | [254]     |
| <i>Salvelinus namaycush</i>  | 27.7     | 16.1             | 2.3268  |                 |                     | [254]     |
| <i>Salvelinus namaycush</i>  | 27.7     | 20               | 2.38497 |                 |                     | [254]     |
| <i>Salvelinus namaycush</i>  | 27.7     | 21.9             | 3.2963  |                 |                     | [254]     |
| <i>Salvelinus namaycush</i>  | 27.7     | 22.1             | 2.7146  |                 |                     | [254]     |
| <i>Salvelinus namaycush</i>  | 27.7     | 22.1             | 2.88911 |                 |                     | [254]     |

| Species                                 | Mass (g) | Temperature (°C) | MR      | Species Average |                     | Reference |
|-----------------------------------------|----------|------------------|---------|-----------------|---------------------|-----------|
|                                         |          |                  |         | Mass (g)        | Q <sub>10</sub> SMR |           |
| <i>Salvelinus namaycush</i>             | 82.8     | 9.1              | 1.33308 |                 |                     | [254]     |
| <i>Salvelinus namaycush</i>             | 82.8     | 9.2              | 1.33308 |                 |                     | [254]     |
| <i>Salvelinus namaycush</i>             | 82.8     | 10.4             | 1.85472 |                 |                     | [254]     |
| <i>Salvelinus namaycush</i>             | 82.8     | 10.4             | 2.66616 |                 |                     | [254]     |
| <i>Salvelinus namaycush</i>             | 82.8     | 10.7             | 2.66616 |                 |                     | [254]     |
| <i>Salvelinus namaycush</i>             | 82.8     | 13.9             | 3.65148 |                 |                     | [254]     |
| <i>Salvelinus namaycush</i>             | 82.8     | 14.1             | 2.6082  |                 |                     | [254]     |
| <i>Salvelinus namaycush</i>             | 82.8     | 14.1             | 3.12984 |                 |                     | [254]     |
| <i>Salvelinus namaycush</i>             | 82.8     | 15.7             | 3.12984 |                 |                     | [254]     |
| <i>Salvelinus namaycush</i>             | 82.8     | 15.7             | 4.17312 |                 |                     | [254]     |
| <i>Salvelinus namaycush</i>             | 82.8     | 16.1             | 3.12984 |                 |                     | [254]     |
| <i>Salvelinus namaycush</i>             | 82.8     | 16.1             | 4.17312 |                 |                     | [254]     |
| <i>Salvelinus namaycush</i>             | 82.8     | 20.1             | 4.86864 |                 |                     | [254]     |
| <i>Salvelinus namaycush</i>             | 82.8     | 20.1             | 5.39028 | 42.03888        | 6.429199            | [254]     |
| <i>Sander lucioperca</i>                | 600      | 5                | 12.6    |                 |                     | [254]     |
| <i>Sander lucioperca</i>                | 600      | 10               | 23.94   | 600             | 79.61493            | [254]     |
| <i>Sarotherodon galilaeus galilaeus</i> | 283      | 26               | 13.867  | 283             | 25.24325            | [254]     |
| <i>Scorpaena porcus</i>                 | 50       | 20               | 2.31    | 50              | 5.673567            | [254]     |
| <i>Scyliorhinus canicula</i>            | 175      | 12               | 3.43    |                 |                     | [254]     |
| <i>Scyliorhinus canicula</i>            | 712      | 17               | 16.4472 |                 |                     | [254]     |
| <i>Scyliorhinus canicula</i>            | 712      | 17               | 20.4344 |                 |                     | [254]     |
| <i>Scyliorhinus canicula</i>            | 712      | 17               | 23.4248 |                 |                     | [254]     |
| <i>Scyliorhinus canicula</i>            | 712      | 17               | 25.9168 |                 |                     | [254]     |
| <i>Scyliorhinus canicula</i>            | 712      | 17               | 28.4088 |                 |                     | [254]     |
| <i>Scyliorhinus canicula</i>            | 712      | 17               | 29.4056 |                 |                     | [254]     |
| <i>Scyliorhinus canicula</i>            | 712      | 17               | 29.904  |                 |                     | [254]     |
| <i>Scyliorhinus canicula</i>            | 712      | 17               | 29.904  |                 |                     | [254]     |
| <i>Scyliorhinus canicula</i>            | 748      | 15               | 27.7508 |                 |                     | [254]     |
| <i>Scyliorhinus canicula</i>            | 748      | 15               | 36.652  |                 |                     | [254]     |
| <i>Scyliorhinus canicula</i>            | 788      | 12               | 14.8932 |                 |                     | [254]     |

| Species                       | Mass (g) | Temperature (°C) | MR      | Species Average |                     | Reference |
|-------------------------------|----------|------------------|---------|-----------------|---------------------|-----------|
|                               |          |                  |         | Mass (g)        | Q <sub>10</sub> SMR |           |
| <i>Scyliorhinus canicula</i>  | 788      | 12               | 16.548  |                 |                     | [254]     |
| <i>Scyliorhinus canicula</i>  | 788      | 12               | 18.7544 |                 |                     | [254]     |
| <i>Scyliorhinus canicula</i>  | 788      | 12               | 20.4092 |                 |                     | [254]     |
| <i>Scyliorhinus canicula</i>  | 788      | 12               | 20.4092 |                 |                     | [254]     |
| <i>Scyliorhinus canicula</i>  | 857      | 7                | 13.1978 |                 |                     | [254]     |
| <i>Scyliorhinus canicula</i>  | 857      | 7                | 14.9975 |                 |                     | [254]     |
| <i>Scyliorhinus canicula</i>  | 857      | 7                | 16.7972 |                 |                     | [254]     |
| <i>Scyliorhinus canicula</i>  | 857      | 7                | 17.3971 |                 |                     | [254]     |
| <i>Scyliorhinus canicula</i>  | 857      | 7                | 17.997  |                 |                     | [254]     |
| <i>Scyliorhinus canicula</i>  | 857      | 7                | 18.5969 | 722.2554        | 68.2574             | [254]     |
| <i>Scyliorhinus stellaris</i> | 1735     | 17.5             | 58.296  |                 |                     | [254]     |
| <i>Scyliorhinus stellaris</i> | 1860     | 17               | 71.61   |                 |                     | [254]     |
| <i>Scyliorhinus stellaris</i> | 2300     | 16               | 17.71   |                 |                     | [254]     |
| <i>Scyliorhinus stellaris</i> | 2300     | 16               | 40.25   |                 |                     | [254]     |
| <i>Scyliorhinus stellaris</i> | 2300     | 16               | 45.08   |                 |                     | [254]     |
| <i>Scyliorhinus stellaris</i> | 2530     | 18.3             | 7.084   |                 |                     | [254]     |
| <i>Scyliorhinus stellaris</i> | 2800     | 19               | 9.8     | 2234.509        | 75.32901            | [254]     |
| <i>Sebastes diploproa</i>     | 2        | 10               | 0.1638  |                 |                     | [254]     |
| <i>Sebastes diploproa</i>     | 2        | 10               | 0.1638  |                 |                     | [254]     |
| <i>Sebastes diploproa</i>     | 2        | 10               | 0.2072  |                 |                     | [254]     |
| <i>Sebastes diploproa</i>     | 2        | 15               | 0.2212  |                 |                     | [254]     |
| <i>Sebastes diploproa</i>     | 2        | 15               | 0.224   |                 |                     | [254]     |
| <i>Sebastes diploproa</i>     | 2        | 15               | 0.2548  |                 |                     | [254]     |
| <i>Sebastes diploproa</i>     | 2        | 20               | 0.2366  |                 |                     | [254]     |
| <i>Sebastes diploproa</i>     | 2        | 20               | 0.2968  |                 |                     | [254]     |
| <i>Sebastes diploproa</i>     | 2        | 20               | 0.3556  | 2               | 0.722862            | [254]     |
| <i>Sebastolobus altivelis</i> | 1.7      | 5.7              | 0.05831 |                 |                     | [254]     |
| <i>Sebastolobus altivelis</i> | 1.9      | 5.7              | 0.05054 |                 |                     | [254]     |
| <i>Sebastolobus altivelis</i> | 129      | 5.7              | 0.4515  |                 |                     | [254]     |
| <i>Sebastolobus altivelis</i> | 139      | 5.7              | 0.4865  |                 |                     | [254]     |

| Species                            | Mass (g) | Temperature (°C) | MR       | Species Average |                     | Reference |
|------------------------------------|----------|------------------|----------|-----------------|---------------------|-----------|
|                                    |          |                  |          | Mass (g)        | Q <sub>10</sub> SMR |           |
| <i>Sebastolobus altivelis</i>      | 152      | 5.7              | 0.4256   |                 |                     | [254]     |
| <i>Sebastolobus altivelis</i>      | 198      | 5.7              | 0.5544   | 34.6912         | 1.159477            | [254]     |
| <i>Seriola quinqueradiata</i>      | 989      | 19.2             | 102.4604 | 989             | 261.9054            | [254]     |
| <i>Squalus acanthias</i>           | 100      | 13               | 10.22    |                 |                     | [254]     |
| <i>Squalus acanthias</i>           | 640      | 13               | 23.296   |                 |                     | [254]     |
| <i>Squalus acanthias</i>           | 940      | 13               | 36.19    |                 |                     | [254]     |
| <i>Squalus acanthias</i>           | 1050     | 13               | 44.835   |                 |                     | [254]     |
| <i>Squalus acanthias</i>           | 1120     | 13               | 50.176   |                 |                     | [254]     |
| <i>Squalus acanthias</i>           | 1240     | 13               | 45.136   |                 |                     | [254]     |
| <i>Squalus acanthias</i>           | 1550     | 13               | 52.08    |                 |                     | [254]     |
| <i>Squalus acanthias</i>           | 1615     | 9                | 24.871   |                 |                     | [254]     |
| <i>Squalus acanthias</i>           | 1750     | 13               | 67.375   |                 |                     | [254]     |
| <i>Squalus acanthias</i>           | 1812     | 9                | 26.6364  |                 |                     | [254]     |
| <i>Squalus acanthias</i>           | 1854     | 10               | 42.8274  |                 |                     | [254]     |
| <i>Squalus acanthias</i>           | 1870     | 13               | 70.686   |                 |                     | [254]     |
| <i>Squalus acanthias</i>           | 2700     | 13               | 88.83    |                 |                     | [254]     |
| <i>Squalus acanthias</i>           | 3300     | 13               | 117.81   |                 |                     | [254]     |
| <i>Squalus acanthias</i>           | 3500     | 11               | 144.55   |                 |                     | [254]     |
| <i>Squalus acanthias</i>           | 4600     | 13               | 151.34   |                 |                     | [254]     |
| <i>Squalus acanthias</i>           | 5760     | 13               | 197.568  |                 |                     | [254]     |
| <i>Squalus acanthias</i>           | 7040     | 13               | 236.544  |                 |                     | [254]     |
| <i>Squalus acanthias</i>           | 7850     | 13               | 214.305  |                 |                     | [254]     |
| <i>Squalus acanthias</i>           | 8970     | 13               | 156.975  | 1994.148        | 236.2522            | [254]     |
| <i>Thymallus arcticus arcticus</i> | 283      | 4                | 13.4708  |                 |                     | [254]     |
| <i>Thymallus arcticus arcticus</i> | 283      | 8                | 14.8575  |                 |                     | [254]     |
| <i>Thymallus arcticus arcticus</i> | 283      | 10               | 18.0271  |                 |                     | [254]     |
| <i>Thymallus arcticus arcticus</i> | 283      | 12               | 22.7815  | 283             | 73.83781            | [254]     |
| <i>Tilapia zillii</i>              | 315      | 26               | 13.0095  | 315             | 23.68228            | [254]     |
| <i>Torpedo marmorata</i>           | 448      | 16               | 6.8992   |                 |                     | [254]     |
| <i>Torpedo marmorata</i>           | 803      | 16               | 16.3009  |                 |                     | [254]     |



| Species                            | Mass (g) | Temperature (°C) | MR       | Species Average |                     | Reference |
|------------------------------------|----------|------------------|----------|-----------------|---------------------|-----------|
|                                    |          |                  |          | Mass (g)        | Q <sub>10</sub> SMR |           |
| <i>Torpedo marmorata</i>           | 3300     | 16               | 66.99    | 1058.853        | 58.79025            | [254]     |
| <i>Typhlogobius californiensis</i> | 0.43     | 15               | 0.00903  |                 |                     | [254]     |
| <i>Typhlogobius californiensis</i> | 0.44     | 15               | 0.008316 |                 |                     | [254]     |
| <i>Typhlogobius californiensis</i> | 0.61     | 15               | 0.011102 |                 |                     | [254]     |
| <i>Typhlogobius californiensis</i> | 0.67     | 15               | 0.01407  |                 |                     | [254]     |
| <i>Typhlogobius californiensis</i> | 1.17     | 15               | 0.014742 |                 |                     | [254]     |
| <i>Typhlogobius californiensis</i> | 1.17     | 15               | 0.017199 |                 |                     | [254]     |
| <i>Typhlogobius californiensis</i> | 1.18     | 15               | 0.019824 |                 |                     | [254]     |
| <i>Typhlogobius californiensis</i> | 1.37     | 15               | 0.020139 |                 |                     | [254]     |
| <i>Typhlogobius californiensis</i> | 1.58     | 15               | 0.018802 |                 |                     | [254]     |
| <i>Typhlogobius californiensis</i> | 1.72     | 15               | 0.025284 |                 |                     | [254]     |
| <i>Typhlogobius californiensis</i> | 1.85     | 15               | 0.022015 |                 |                     | [254]     |
| <i>Typhlogobius californiensis</i> | 1.88     | 15               | 0.021056 |                 |                     | [254]     |
| <i>Typhlogobius californiensis</i> | 2.02     | 15               | 0.025452 |                 |                     | [254]     |
| <i>Typhlogobius californiensis</i> | 2.11     | 15               | 0.023632 |                 |                     | [254]     |
| <i>Typhlogobius californiensis</i> | 2.5      | 15               | 0.02275  |                 |                     | [254]     |
| <i>Typhlogobius californiensis</i> | 3.15     | 15               | 0.028665 |                 |                     | [254]     |
| <i>Typhlogobius californiensis</i> | 3.34     | 15               | 0.032732 | 1.357844        | 0.058196            | [254]     |
| <b>Amphibians</b>                  |          |                  |          |                 |                     |           |
| <i>Ambystoma gracile</i>           | 30.39    | 15               | 0.6352   | 30.39           | 3.922228            | [255]     |
| <i>Ambystoma jeffersonianum</i>    | 8.92     | 15               | 0.3158   | 8.92            | 1.949999            | [255]     |
| <i>Ambystoma macrodactylum</i>     | 3.414    | 15               | 0.1098   |                 |                     | [255]     |
| <i>Ambystoma macrodactylum</i>     | 3.7      | 15               | 0.4514   | 3.554124        | 1.374689            | [255]     |
| <i>Ambystoma maculatum</i>         | 13.1     | 5                | 0.3157   |                 |                     | [255]     |
| <i>Ambystoma maculatum</i>         | 11.75    | 5                | 0.3631   |                 |                     | [255]     |
| <i>Ambystoma maculatum</i>         | 11.9     | 10               | 0.3045   |                 |                     | [255]     |
| <i>Ambystoma maculatum</i>         | 11.75    | 10               | 0.5875   |                 |                     | [255]     |
| <i>Ambystoma maculatum</i>         | 15.83    | 15               | 0.3625   |                 |                     | [255]     |
| <i>Ambystoma maculatum</i>         | 13.4     | 15               | 1.3199   |                 |                     | [255]     |

| Species                     | Mass (g) | Temperature (°C) | MR     | Species Average |                     | Reference |
|-----------------------------|----------|------------------|--------|-----------------|---------------------|-----------|
|                             |          |                  |        | Mass (g)        | Q <sub>10</sub> SMR |           |
| <i>Ambystoma maculatum</i>  | 11.75    | 15               | 1.2396 |                 |                     | [255]     |
| <i>Ambystoma maculatum</i>  | 0.512    | 20               | 0.0518 |                 |                     | [255]     |
| <i>Ambystoma maculatum</i>  | 12.9     | 25               | 1.677  |                 |                     | [255]     |
| <i>Ambystoma maculatum</i>  | 11.75    | 25               | 1.544  |                 |                     | [255]     |
| <i>Ambystoma maculatum</i>  | 12.9     | 30               | 1.7183 |                 |                     | [255]     |
| <i>Ambystoma maculatum</i>  | 11.75    | 30               | 1.5592 | 9.623585        | 3.329555            | [255]     |
| <i>Ambystoma mexicanum</i>  | 43.7     | 20               | 0.9614 |                 |                     | [255]     |
| <i>Ambystoma mexicanum</i>  | 21.3     | 22               | 0.3195 | 30.50918        | 2.128436            | [255]     |
| <i>Ambystoma opacum</i>     | 4.65     | 14               | 0.0865 |                 |                     | [255]     |
| <i>Ambystoma opacum</i>     | 5.8      | 15               | 0.464  | 5.193265        | 1.286995            | [255]     |
| <i>Ambystoma talpoideum</i> | 7        | 15               | 0.56   | 7               | 3.457884            | [255]     |
| <i>Ambystoma tigrinum</i>   | 23       | 5                | 0.276  |                 |                     | [255]     |
| <i>Ambystoma tigrinum</i>   | 16.49    | 6                | 0.8595 |                 |                     | [255]     |
| <i>Ambystoma tigrinum</i>   | 15       | 10               | 0.8895 |                 |                     | [255]     |
| <i>Ambystoma tigrinum</i>   | 10.78    | 15               | 0.138  |                 |                     | [255]     |
| <i>Ambystoma tigrinum</i>   | 35       | 15               | 1.5484 |                 |                     | [255]     |
| <i>Ambystoma tigrinum</i>   | 16.49    | 15               | 1.3213 |                 |                     | [255]     |
| <i>Ambystoma tigrinum</i>   | 16.5     | 15               | 1.5246 |                 |                     | [255]     |
| <i>Ambystoma tigrinum</i>   | 29.4     | 23               | 2.9988 |                 |                     | [255]     |
| <i>Ambystoma tigrinum</i>   | 33.8     | 23               | 2.6026 |                 |                     | [255]     |
| <i>Ambystoma tigrinum</i>   | 23       | 25               | 1.978  |                 |                     | [255]     |
| <i>Ambystoma tigrinum</i>   | 8.1      | 25               | 0.891  |                 |                     | [255]     |
| <i>Ambystoma tigrinum</i>   | 35       | 25               | 1.7885 |                 |                     | [255]     |
| <i>Ambystoma tigrinum</i>   | 16.49    | 25               | 3.1908 |                 |                     | [255]     |
| <i>Ambystoma tigrinum</i>   | 14.9     | 25               | 1.5675 | 19.20684        | 5.785948            | [255]     |
| <i>Amphiuma means</i>       | 352      | 5                | 0.884  |                 |                     | [255]     |
| <i>Amphiuma means</i>       | 500      | 5                | 1.65   |                 |                     | [255]     |
| <i>Amphiuma means</i>       | 500      | 10               | 2.8    |                 |                     | [255]     |
| <i>Amphiuma means</i>       | 375      | 15               | 2.531  |                 |                     | [255]     |
| <i>Amphiuma means</i>       | 500      | 15               | 3.1    |                 |                     | [255]     |

| Species                             | Mass (g) | Temperature (°C) | MR      | Species Average |                     | Reference |
|-------------------------------------|----------|------------------|---------|-----------------|---------------------|-----------|
|                                     |          |                  |         | Mass (g)        | Q <sub>10</sub> SMR |           |
| <i>Amphiuma means</i>               | 408      | 15               | 2.513   |                 |                     | [255]     |
| <i>Amphiuma means</i>               | 125      | 18               | 4.875   |                 |                     | [255]     |
| <i>Amphiuma means</i>               | 83       | 20               | 2.324   |                 |                     | [255]     |
| <i>Amphiuma means</i>               | 500      | 20               | 5.05    |                 |                     | [255]     |
| <i>Amphiuma means</i>               | 1270     | 21.5             | 17.304  |                 |                     | [255]     |
| <i>Amphiuma means</i>               | 376      | 25               | 5.038   |                 |                     | [255]     |
| <i>Amphiuma means</i>               | 500      | 25               | 9.25    |                 |                     | [255]     |
| <i>Amphiuma means</i>               | 500      | 27               | 15.8    |                 |                     | [255]     |
| <i>Amphiuma means</i>               | 500      | 30               | 35.3    | 392.839         | 22.60393            | [255]     |
| <i>Amphiuma tridactylum</i>         | 652      | 15               | 2.452   |                 |                     | [255]     |
| <i>Amphiuma tridactylum</i>         | 493      | 25               | 9.86    | 566.9533        | 20.43839            | [255]     |
| <i>Cryptobranchus alleganiensis</i> | 514      | 5                | 4.4615  |                 |                     | [255]     |
| <i>Cryptobranchus alleganiensis</i> | 511      | 15               | 10.6595 |                 |                     | [255]     |
| <i>Cryptobranchus alleganiensis</i> | 423      | 25               | 13.0792 | 480.7376        | 52.70947            | [255]     |
| <i>Dicamptodon ensatus</i>          | 101.25   | 15               | 1.3061  |                 |                     | [255]     |
| <i>Dicamptodon ensatus</i>          | 24       | 15               | 0.7488  | 49.29503        | 6.106516            | [255]     |
| <i>Rhyacotriton olympicus</i>       | 2.6      | 15               | 0.2496  | 2.6             | 1.541228            | [255]     |
| <i>Aneides ferreus</i>              | 2.73     | 15               | 0.0743  |                 |                     | [255]     |
| <i>Aneides ferreus</i>              | 3.2      | 25               | 0.2118  | 2.955673        | 0.521441            | [255]     |
| <i>Aneides flavipunctatus</i>       | 4.57     | 15               | 0.1197  |                 |                     | [255]     |
| <i>Aneides flavipunctatus</i>       | 1.79     | 25               | 0.1421  | 2.860122        | 0.542116            | [255]     |
| <i>Aneides hardii</i>               | 0.97     | 5                | 0.0301  |                 |                     | [255]     |
| <i>Aneides hardii</i>               | 0.97     | 10               | 0.0359  |                 |                     | [255]     |
| <i>Aneides hardii</i>               | 0.97     | 15               | 0.0485  |                 |                     | [255]     |
| <i>Aneides hardii</i>               | 0.97     | 20               | 0.0514  |                 |                     | [255]     |
| <i>Aneides hardii</i>               | 0.97     | 25               | 0.0912  | 0.97            | 0.294235            | [255]     |
| <i>Aneides lugubris</i>             | 5.58     | 15               | 0.1495  |                 |                     | [255]     |
| <i>Aneides lugubris</i>             | 0.116    | 20               | 0.0447  | 0.804537        | 0.414152            | [255]     |
| <i>Batrachoseps attenuatus</i>      | 0.65     | 5                | 0.0166  |                 |                     | [255]     |
| <i>Batrachoseps attenuatus</i>      | 0.77     | 15               | 0.0318  |                 |                     | [255]     |

| Species                             | Mass (g) | Temperature (°C) | MR     | Species Average |                     | Reference |
|-------------------------------------|----------|------------------|--------|-----------------|---------------------|-----------|
|                                     |          |                  |        | Mass (g)        | Q <sub>10</sub> SMR |           |
| <i>Batrachoseps attenuatus</i>      | 0.93     | 15               | 0.0453 |                 |                     | [255]     |
| <i>Batrachoseps attenuatus</i>      | 1.55     | 20               | 0.093  |                 |                     | [255]     |
| <i>Batrachoseps attenuatus</i>      | 0.931    | 20               | 0.0692 |                 |                     | [255]     |
| <i>Batrachoseps attenuatus</i>      | 0.74     | 25               | 0.0838 |                 |                     | [255]     |
| <i>Batrachoseps attenuatus</i>      | 0.93     | 25               | 0.0802 | 0.895625        | 0.256322            | [255]     |
| <i>Bolitoglossa franklini</i>       | 3.18     | 15               | 0.055  | 3.18            | 0.339614            | [255]     |
| <i>Bolitoglossa morio</i>           | 2.09     | 15               | 0.0445 | 2.09            | 0.274778            | [255]     |
| <i>Bolitoglossa occidentalis</i>    | 1.07     | 5                | 0.0196 |                 |                     | [255]     |
| <i>Bolitoglossa occidentalis</i>    | 0.97     | 15               | 0.0202 |                 |                     | [255]     |
| <i>Bolitoglossa occidentalis</i>    | 0.61     | 15               | 0.0168 |                 |                     | [255]     |
| <i>Bolitoglossa occidentalis</i>    | 0.98     | 25               | 0.1039 |                 |                     | [255]     |
| <i>Bolitoglossa occidentalis</i>    | 0.61     | 25               | 0.0673 | 0.823395        | 0.180045            | [255]     |
| <i>Bolitoglossa subpalmata</i>      | 1.63     | 5                | 0.0159 |                 |                     | [255]     |
| <i>Bolitoglossa subpalmata</i>      | 1.63     | 10               | 0.0251 |                 |                     | [255]     |
| <i>Bolitoglossa subpalmata</i>      | 1.63     | 15               | 0.0513 |                 |                     | [255]     |
| <i>Bolitoglossa subpalmata</i>      | 1.63     | 20               | 0.0708 | 1.63            | 0.261135            | [255]     |
| <i>Chiropterotriton bromeliacia</i> | 0.59     | 15               | 0.0144 | 0.59            | 0.088917            | [255]     |
| <i>Desmognathus fuscus</i>          | 0.8      | 5                | 0.0132 |                 |                     | [255]     |
| <i>Desmognathus fuscus</i>          | 1.17     | 5                | 0.0163 |                 |                     | [255]     |
| <i>Desmognathus fuscus</i>          | 2.07     | 5                | 0.035  |                 |                     | [255]     |
| <i>Desmognathus fuscus</i>          | 1.67     | 10               | 0.0525 |                 |                     | [255]     |
| <i>Desmognathus fuscus</i>          | 1.95     | 10               | 0.2139 |                 |                     | [255]     |
| <i>Desmognathus fuscus</i>          | 4.5      | 13               | 0.1935 |                 |                     | [255]     |
| <i>Desmognathus fuscus</i>          | 0.91     | 15               | 0.0291 |                 |                     | [255]     |
| <i>Desmognathus fuscus</i>          | 1.24     | 15               | 0.0423 |                 |                     | [255]     |
| <i>Desmognathus fuscus</i>          | 1.7      | 15               | 0.0584 |                 |                     | [255]     |
| <i>Desmognathus fuscus</i>          | 2.53     | 16.5             | 0.0972 |                 |                     | [255]     |
| <i>Desmognathus fuscus</i>          | 1.31     | 17               | 0.059  |                 |                     | [255]     |
| <i>Desmognathus fuscus</i>          | 2.26     | 20               | 0.1022 |                 |                     | [255]     |
| <i>Desmognathus fuscus</i>          | 2.09     | 20               | 0.0895 |                 |                     | [255]     |

| Species                             | Mass (g) | Temperature (°C) | MR     | Species Average |                     | Reference |
|-------------------------------------|----------|------------------|--------|-----------------|---------------------|-----------|
|                                     |          |                  |        | Mass (g)        | Q <sub>10</sub> SMR |           |
| <i>Desmognathus fuscus</i>          | 1.92     | 20               | 0.0974 | 1.696588        | 0.415186            | [255]     |
| <i>Desmognathus monticola</i>       | 5.4      | 15               | 0.3078 |                 |                     | [255]     |
| <i>Desmognathus monticola</i>       | 3.43     | 20               | 0.1454 | 4.303719        | 1.07177             | [255]     |
| <i>Desmognathus ochrophaes</i>      | 0.9      | 5                | 0.01   |                 |                     | [255]     |
| <i>Desmognathus ochrophaes</i>      | 2.75     | 5                | 0.0338 |                 |                     | [255]     |
| <i>Desmognathus ochrophaes</i>      | 1.17     | 5                | 0.0163 |                 |                     | [255]     |
| <i>Desmognathus ochrophaes</i>      | 1.07     | 5                | 0.0173 |                 |                     | [255]     |
| <i>Desmognathus ochrophaes</i>      | 0.9      | 10               | 0.017  |                 |                     | [255]     |
| <i>Desmognathus ochrophaes</i>      | 2.68     | 10               | 0.0496 |                 |                     | [255]     |
| <i>Desmognathus ochrophaes</i>      | 1.16     | 10               | 0.0341 |                 |                     | [255]     |
| <i>Desmognathus ochrophaes</i>      | 0.9      | 14               | 0.02   |                 |                     | [255]     |
| <i>Desmognathus ochrophaes</i>      | 1.965    | 15               | 0.1769 |                 |                     | [255]     |
| <i>Desmognathus ochrophaes</i>      | 2.56     | 15               | 0.0822 |                 |                     | [255]     |
| <i>Desmognathus ochrophaes</i>      | 1.24     | 15               | 0.0423 |                 |                     | [255]     |
| <i>Desmognathus ochrophaes</i>      | 1.09     | 15               | 0.0392 |                 |                     | [255]     |
| <i>Desmognathus ochrophaes</i>      | 0.9      | 17.5             | 0.045  |                 |                     | [255]     |
| <i>Desmognathus ochrophaes</i>      | 1.4      | 17.5             | 0.051  |                 |                     | [255]     |
| <i>Desmognathus ochrophaes</i>      | 1.6      | 17.5             | 0.0427 |                 |                     | [255]     |
| <i>Desmognathus ochrophaes</i>      | 2.5      | 17.5             | 0.082  |                 |                     | [255]     |
| <i>Desmognathus ochrophaes</i>      | 2.43     | 20               | 0.1196 |                 |                     | [255]     |
| <i>Desmognathus ochrophaes</i>      | 1.11     | 20               | 0.0615 |                 |                     | [255]     |
| <i>Desmognathus ochrophaes</i>      | 0.9      | 21               | 0.038  | 1.406094        | 0.281005            | [255]     |
| <i>Desmognathus quadramaculatus</i> | 23.41    | 5                | 0.1639 |                 |                     | [255]     |
| <i>Desmognathus quadramaculatus</i> | 16.4     | 5                | 0.4723 |                 |                     | [255]     |
| <i>Desmognathus quadramaculatus</i> | 9.25     | 5                | 0.2646 |                 |                     | [255]     |
| <i>Desmognathus quadramaculatus</i> | 10.1     | 10               | 0.4444 |                 |                     | [255]     |
| <i>Desmognathus quadramaculatus</i> | 9.25     | 10               | 0.4033 |                 |                     | [255]     |
| <i>Desmognathus quadramaculatus</i> | 22.28    | 15               | 0.43   |                 |                     | [255]     |
| <i>Desmognathus quadramaculatus</i> | 16.8     | 15               | 0.9341 |                 |                     | [255]     |
| <i>Desmognathus quadramaculatus</i> | 9.25     | 15               | 0.5337 |                 |                     | [255]     |

| Species                             | Mass (g) | Temperature (°C) | MR     | Species Average |                     | Reference |
|-------------------------------------|----------|------------------|--------|-----------------|---------------------|-----------|
|                                     |          |                  |        | Mass (g)        | Q <sub>10</sub> SMR |           |
| <i>Desmognathus quadramaculatus</i> | 2.24     | 20               | 0.0977 |                 |                     | [255]     |
| <i>Desmognathus quadramaculatus</i> | 19.36    | 20               | 0.8267 |                 |                     | [255]     |
| <i>Desmognathus quadramaculatus</i> | 13.3     | 20               | 0.9323 |                 |                     | [255]     |
| <i>Desmognathus quadramaculatus</i> | 9.25     | 20               | 0.6216 |                 |                     | [255]     |
| <i>Desmognathus quadramaculatus</i> | 22.82    | 25               | 1.1866 |                 |                     | [255]     |
| <i>Desmognathus quadramaculatus</i> | 15.1     | 25               | 1.1612 |                 |                     | [255]     |
| <i>Desmognathus quadramaculatus</i> | 9.25     | 25               | 0.7104 | 12.19139        | 2.961446            | [255]     |
| <i>Ensatina eschscholtzi</i>        | 0.308    | 14               | 0.0176 |                 |                     | [255]     |
| <i>Ensatina eschscholtzi</i>        | 3.39     | 15               | 0.1292 |                 |                     | [255]     |
| <i>Ensatina eschscholtzi</i>        | 5.3      | 25               | 0.3572 | 1.768787        | 0.454353            | [255]     |
| <i>Eurycea bislineata</i>           | 1.041    | 1                | 0.016  |                 |                     | [255]     |
| <i>Eurycea bislineata</i>           | 1.14     | 5                | 0.0157 |                 |                     | [255]     |
| <i>Eurycea bislineata</i>           | 1.07     | 10               | 0.0263 |                 |                     | [255]     |
| <i>Eurycea bislineata</i>           | 1.092    | 10               | 0.0489 |                 |                     | [255]     |
| <i>Eurycea bislineata</i>           | 0.93     | 15               | 0.0494 |                 |                     | [255]     |
| <i>Eurycea bislineata</i>           | 1.17     | 16               | 0.0674 |                 |                     | [255]     |
| <i>Eurycea bislineata</i>           | 0.93     | 20               | 0.0539 | 1.049582        | 0.292234            | [255]     |
| <i>Eurycea longicauda</i>           | 1.57     | 15               | 0.0504 | 1.57            | 0.31121             | [255]     |
| <i>Eurycea multiplicata</i>         | 0.64     | 5                | 0.0088 |                 |                     | [255]     |
| <i>Eurycea multiplicata</i>         | 0.78     | 5                | 0.0322 |                 |                     | [255]     |
| <i>Eurycea multiplicata</i>         | 0.63     | 10               | 0.0093 |                 |                     | [255]     |
| <i>Eurycea multiplicata</i>         | 0.8      | 10               | 0.0858 |                 |                     | [255]     |
| <i>Eurycea multiplicata</i>         | 0.71     | 15               | 0.0155 |                 |                     | [255]     |
| <i>Eurycea multiplicata</i>         | 0.65     | 15               | 0.1162 |                 |                     | [255]     |
| <i>Eurycea multiplicata</i>         | 0.84     | 20               | 0.0931 |                 |                     | [255]     |
| <i>Eurycea multiplicata</i>         | 0.79     | 20               | 0.1764 |                 |                     | [255]     |
| <i>Eurycea multiplicata</i>         | 0.73     | 25               | 0.0555 | 0.726311        | 0.280324            | [255]     |
| <i>Eurycea nana</i>                 | 0.154    | 25               | 0.0132 | 0.154           | 0.036936            | [255]     |
| <i>Eurycea neotenes</i>             | 0.243    | 25               | 0.0258 | 0.243           | 0.072193            | [255]     |
| <i>Eurycea pterophila?</i>          | 0.196    | 25               | 0.0176 | 0.196           | 0.049248            | [255]     |

| Species                           | Mass (g) | Temperature (°C) | MR     | Species Average |                     | Reference |
|-----------------------------------|----------|------------------|--------|-----------------|---------------------|-----------|
|                                   |          |                  |        | Mass (g)        | Q <sub>10</sub> SMR |           |
| <i>Gyrinophilus danielsi</i>      | 12.78    | 2                | 0.1035 |                 |                     | [255]     |
| <i>Gyrinophilus danielsi</i>      | 14.44    | 15               | 0.322  |                 |                     | [255]     |
| <i>Gyrinophilus danielsi</i>      | 13.76    | 25               | 0.9109 | 13.64286        | 2.084905            | [255]     |
| <i>Gyrinophilus porphyriectus</i> | 7.28     | 5                | 0.0531 |                 |                     | [255]     |
| <i>Gyrinophilus porphyriectus</i> | 15.3     | 15               | 0.8874 |                 |                     | [255]     |
| <i>Gyrinophilus porphyriectus</i> | 12.4     | 15.5             | 0.1885 |                 |                     | [255]     |
| <i>Gyrinophilus porphyriectus</i> | 7.36     | 25               | 0.4858 |                 |                     | [255]     |
| <i>Gyrinophilus porphyriectus</i> | 7.67     | 15               | 0.1795 | 9.514447        | 1.462158            | [255]     |
| <i>Hydromantes sp.</i>            | 3.23     | 15               | 0.124  | 3.23            | 0.765674            | [255]     |
| <i>Plethodon cinereus</i>         | 0.844    | 1                | 0.012  |                 |                     | [255]     |
| <i>Plethodon cinereus</i>         | 0.7      | 5                | 0.01   |                 |                     | [255]     |
| <i>Plethodon cinereus</i>         | 0.7      | 10               | 0.015  |                 |                     | [255]     |
| <i>Plethodon cinereus</i>         | 0.862    | 10               | 0.0323 |                 |                     | [255]     |
| <i>Plethodon cinereus</i>         | 0.7      | 14               | 0.019  |                 |                     | [255]     |
| <i>Plethodon cinereus</i>         | 0.8      | 15               | 0.032  |                 |                     | [255]     |
| <i>Plethodon cinereus</i>         | 0.99     | 15.5             | 0.039  |                 |                     | [255]     |
| <i>Plethodon cinereus</i>         | 0.7      | 17.5             | 0.028  |                 |                     | [255]     |
| <i>Plethodon cinereus</i>         | 0.6      | 17.5             | 0.0168 |                 |                     | [255]     |
| <i>Plethodon cinereus</i>         | 0.9      | 17.5             | 0.03   |                 |                     | [255]     |
| <i>Plethodon cinereus</i>         | 0.94     | 18.5             | 0.0415 |                 |                     | [255]     |
| <i>Plethodon cinereus</i>         | 1        | 20               | 0.0476 |                 |                     | [255]     |
| <i>Plethodon cinereus</i>         | 0.89     | 20               | 0.0451 |                 |                     | [255]     |
| <i>Plethodon cinereus</i>         | 0.7      | 21               | 0.034  | 0.7997          | 0.16642             | [255]     |
| <i>Plethodon dorsalis</i>         | 0.75     | 5                | 0.0083 |                 |                     | [255]     |
| <i>Plethodon dorsalis</i>         | 0.77     | 10               | 0.0178 |                 |                     | [255]     |
| <i>Plethodon dorsalis</i>         | 0.66     | 15               | 0.0293 |                 |                     | [255]     |
| <i>Plethodon dorsalis</i>         | 0.71     | 20               | 0.0222 |                 |                     | [255]     |
| <i>Plethodon dorsalis</i>         | 0.69     | 25               | 0.0239 | 0.714892        | 0.11557             | [255]     |
| <i>Plethodon glutinosus</i>       | 3.75     | 5                | 0.0443 |                 |                     | [255]     |
| <i>Plethodon glutinosus</i>       | 3.65     | 10               | 0.0762 |                 |                     | [255]     |

| Species                        | Mass (g) | Temperature (°C) | MR     | Species Average |                     | Reference |
|--------------------------------|----------|------------------|--------|-----------------|---------------------|-----------|
|                                |          |                  |        | Mass (g)        | Q <sub>10</sub> SMR |           |
| <i>Plethodon glutinosus</i>    | 4.33     | 14               | 0.2464 |                 |                     | [255]     |
| <i>Plethodon glutinosus</i>    | 4.25     | 15               | 0.1441 |                 |                     | [255]     |
| <i>Plethodon glutinosus</i>    | 3.65     | 15               | 0.1167 |                 |                     | [255]     |
| <i>Plethodon glutinosus</i>    | 4.2      | 15               | 0.3444 |                 |                     | [255]     |
| <i>Plethodon glutinosus</i>    | 3.65     | 20               | 0.1583 |                 |                     | [255]     |
| <i>Plethodon glutinosus</i>    | 5.01     | 20               | 0.1671 |                 |                     | [255]     |
| <i>Plethodon glutinosus</i>    | 3.91     | 25               | 0.3237 | 4.023103        | 0.901225            | [255]     |
| <i>Plethodon jordani</i>       | 3.1      | 5                | 0.027  |                 |                     | [255]     |
| <i>Plethodon jordani</i>       | 3.1      | 10               | 0.058  |                 |                     | [255]     |
| <i>Plethodon jordani</i>       | 3.1      | 14               | 0.087  |                 |                     | [255]     |
| <i>Plethodon jordani</i>       | 1.83     | 15               | 0.0511 |                 |                     | [255]     |
| <i>Plethodon jordani</i>       | 3.1      | 17.5             | 0.109  |                 |                     | [255]     |
| <i>Plethodon jordani</i>       | 4.3      | 17.5             | 0.138  |                 |                     | [255]     |
| <i>Plethodon jordani</i>       | 2.2      | 17.5             | 0.071  |                 |                     | [255]     |
| <i>Plethodon jordani</i>       | 3.1      | 21               | 0.148  |                 |                     | [255]     |
| <i>Plethodon jordani</i>       | 1.83     | 25               | 0.1243 | 2.752539        | 0.463425            | [255]     |
| <i>Plethodon neomexicanus</i>  | 2.47     | 5                | 0.0914 |                 |                     | [255]     |
| <i>Plethodon neomexicanus</i>  | 2.47     | 10               | 0.1186 |                 |                     | [255]     |
| <i>Plethodon neomexicanus</i>  | 2.47     | 15               | 0.1359 |                 |                     | [255]     |
| <i>Plethodon neomexicanus</i>  | 2.47     | 20               | 0.1408 |                 |                     | [255]     |
| <i>Plethodon neomexicanus</i>  | 2.47     | 25               | 0.1507 | 2.47            | 0.77556             | [255]     |
| <i>Plethodon spp.</i>          | 3.25     | 22               | 0.1859 | 3.25            | 0.659595            | [255]     |
| <i>Pseudoeurycea belli</i>     | 10.94    | 15               | 0.1882 |                 |                     | [255]     |
| <i>Pseudoeurycea belli</i>     | 24.45    | 25               | 0.7188 | 16.35491        | 1.528839            | [255]     |
| <i>Pseudoeurycea brunnata</i>  | 3.33     | 15               | 0.656  | 3.33            | 4.050664            | [255]     |
| <i>Pseudoeurycea cephalica</i> | 1.45     | 15               | 0.0354 | 1.45            | 0.218588            | [255]     |
| <i>Pseudoeurycea cochranæ</i>  | 2.23     | 15               | 0.0457 | 2.23            | 0.282188            | [255]     |
| <i>Pseudoeurycea gadovii</i>   | 3.09     | 5                | 0.0442 |                 |                     | [255]     |
| <i>Pseudoeurycea gadovii</i>   | 2.88     | 15               | 0.085  |                 |                     | [255]     |
| <i>Pseudoeurycea gadovii</i>   | 2.99     | 25               | 0.2443 | 2.985433        | 0.600082            | [255]     |



| Species                          | Mass (g) | Temperature (°C) | MR     | Species Average |                     | Reference |
|----------------------------------|----------|------------------|--------|-----------------|---------------------|-----------|
|                                  |          |                  |        | Mass (g)        | Q <sub>10</sub> SMR |           |
| <i>Pseudoeurycea goebeli</i>     | 3.78     | 5                | 0.0359 |                 |                     | [255]     |
| <i>Pseudoeurycea goebeli</i>     | 3.66     | 15               | 0.0831 |                 |                     | [255]     |
| <i>Pseudoeurycea goebeli</i>     | 3.73     | 25               | 0.2842 | 3.723007        | 0.584425            | [255]     |
| <i>Pseudoeurycea leprosa</i>     | 2.46     | 15               | 0.0556 | 2.46            | 0.343318            | [255]     |
| <i>Pseudoeurycea rex</i>         | 1.86     | 15               | 0.0392 | 1.86            | 0.242052            | [255]     |
| <i>Pseudoeurycea smithii</i>     | 6.66     | 15               | 0.1185 |                 |                     | [255]     |
| <i>Pseudoeurycea smithii</i>     | 4.2      | 15               | 0.1008 |                 |                     | [255]     |
| <i>Pseudoeurycea smithii</i>     | 4.2      | 25               | 0.2617 | 4.897686        | 0.693479            | [255]     |
| <i>Pseudotriton ruber</i>        | 10.81    | 5                | 0.0681 |                 |                     | [255]     |
| <i>Pseudotriton ruber</i>        | 10.33    | 15               | 0.2324 |                 |                     | [255]     |
| <i>Pseudotriton ruber</i>        | 5.8      | 15               | 0.4234 |                 |                     | [255]     |
| <i>Pseudotriton ruber</i>        | 10.66    | 25               | 0.6172 | 9.115443        | 1.565894            | [255]     |
| <i>Thorius sp.</i>               | 0.26     | 5                | 0.0041 |                 |                     | [255]     |
| <i>Thorius sp.</i>               | 0.31     | 15               | 0.008  |                 |                     | [255]     |
| <i>Thorius sp.</i>               | 0.25     | 25               | 0.0217 | 0.272119        | 0.055132            | [255]     |
| <i>Necturus maculosus</i>        | 214      | 5                | 1.1684 |                 |                     | [255]     |
| <i>Necturus maculosus</i>        | 101.9    | 5                | 0.5095 |                 |                     | [255]     |
| <i>Necturus maculosus</i>        | 206      | 15               | 2.3031 |                 |                     | [255]     |
| <i>Necturus maculosus</i>        | 101.9    | 15               | 1.2228 |                 |                     | [255]     |
| <i>Necturus maculosus</i>        | 150      | 20               | 7.215  |                 |                     | [255]     |
| <i>Necturus maculosus</i>        | 115      | 21.5             | 3.8956 |                 |                     | [255]     |
| <i>Necturus maculosus</i>        | 114.5    | 22               | 3.1488 |                 |                     | [255]     |
| <i>Necturus maculosus</i>        | 212      | 25               | 5.6222 |                 |                     | [255]     |
| <i>Necturus maculosus</i>        | 125      | 25               | 2.475  | 142.3228        | 12.25402            | [255]     |
| <i>Molga torosa?</i>             | 17.5     | 18.5             | 2.73   | 17.5            | 12.7783             | [255]     |
| <i>Notophthalmus viridescens</i> | 1.63     | 5                | 0.0898 |                 |                     | [255]     |
| <i>Notophthalmus viridescens</i> | 2.43     | 10               | 0.1993 |                 |                     | [255]     |
| <i>Notophthalmus viridescens</i> | 1.72     | 15               | 0.0592 |                 |                     | [255]     |
| <i>Notophthalmus viridescens</i> | 1.7      | 15               | 0.1365 |                 |                     | [255]     |
| <i>Notophthalmus viridescens</i> | 1.23     | 15               | 0.0752 |                 |                     | [255]     |

| Species                          | Mass (g) | Temperature (°C) | MR     | Species Average |                     | Reference |
|----------------------------------|----------|------------------|--------|-----------------|---------------------|-----------|
|                                  |          |                  |        | Mass (g)        | Q <sub>10</sub> SMR |           |
| <i>Notophthalmus viridescens</i> | 3        | 20               | 0.135  |                 |                     | [255]     |
| <i>Notophthalmus viridescens</i> | 1.31     | 20               | 0.1533 |                 |                     | [255]     |
| <i>Notophthalmus viridescens</i> | 1.35     | 25               | 0.125  |                 |                     | [255]     |
| <i>Notophthalmus viridescens</i> | 1.5      | 25               | 0.1532 | 1.69152         | 0.636548            | [255]     |
| <i>Salamandra maculosa</i>       | 28.32    | 18.5             | 3.6448 | 28.32           | 17.06019            | [255]     |
| <i>Salamandra salamandra</i>     | 19.1     | 15               | 1.5471 |                 |                     | [255]     |
| <i>Salamandra salamandra</i>     | 75       | 16               | 1.1273 |                 |                     | [255]     |
| <i>Salamandra salamandra</i>     | 29       | 16               | 0.6238 |                 |                     | [255]     |
| <i>Salamandra salamandra</i>     | 10       | 16               | 0.4176 | 25.38769        | 4.777296            | [255]     |
| <i>Taricha granulosa</i>         | 9        | 5                | 0.1152 |                 |                     | [255]     |
| <i>Taricha granulosa</i>         | 13.3     | 5                | 0.5413 |                 |                     | [255]     |
| <i>Taricha granulosa</i>         | 10       | 5                | 0.4    |                 |                     | [255]     |
| <i>Taricha granulosa</i>         | 12.5     | 10               | 0.745  |                 |                     | [255]     |
| <i>Taricha granulosa</i>         | 10       | 10               | 0.6    |                 |                     | [255]     |
| <i>Taricha granulosa</i>         | 6.56     | 15               | 0.1601 |                 |                     | [255]     |
| <i>Taricha granulosa</i>         | 13.8     | 15               | 1.093  |                 |                     | [255]     |
| <i>Taricha granulosa</i>         | 10       | 15               | 0.768  |                 |                     | [255]     |
| <i>Taricha granulosa</i>         | 8.75     | 20               | 0.392  |                 |                     | [255]     |
| <i>Taricha granulosa</i>         | 10.1     | 20               | 1.0262 |                 |                     | [255]     |
| <i>Taricha granulosa</i>         | 10       | 20               | 1.004  |                 |                     | [255]     |
| <i>Taricha granulosa</i>         | 11.9     | 25               | 1.6398 |                 |                     | [255]     |
| <i>Taricha granulosa</i>         | 10       | 25               | 1.4    | 10.27591        | 3.837594            | [255]     |
| <i>Taricha rivularis</i>         | 10.83    | 15               | 0.3011 | 10.83           | 1.85923             | [255]     |
| <i>Taricha torosa</i>            | 11.23    | 10               | 0.1797 |                 |                     | [255]     |
| <i>Taricha torosa</i>            | 9.87     | 10               | 0.0888 |                 |                     | [255]     |
| <i>Taricha torosa</i>            | 6.94     | 15               | 0.2089 |                 |                     | [255]     |
| <i>Taricha torosa</i>            | 10.67    | 15               | 0.286  |                 |                     | [255]     |
| <i>Taricha torosa</i>            | 9.7      | 15               | 0.5238 |                 |                     | [255]     |
| <i>Taricha torosa</i>            | 9.7      | 15               | 0.2425 |                 |                     | [255]     |
| <i>Taricha torosa</i>            | 11.23    | 15               | 0.6064 |                 |                     | [255]     |

| Species                         | Mass (g) | Temperature (°C) | MR      | Species Average |                     | Reference |
|---------------------------------|----------|------------------|---------|-----------------|---------------------|-----------|
|                                 |          |                  |         | Mass (g)        | Q <sub>10</sub> SMR |           |
| <i>Taricha torosa</i>           | 9.87     | 15               | 0.2566  |                 |                     | [255]     |
| <i>Taricha torosa</i>           | 19.7     | 17               | 1.3514  |                 |                     | [255]     |
| <i>Taricha torosa</i>           | 11.23    | 20               | 0.685   |                 |                     | [255]     |
| <i>Taricha torosa</i>           | 9.87     | 20               | 0.2665  |                 |                     | [255]     |
| <i>Taricha torosa</i>           | 10.67    | 25               | 0.5452  |                 |                     | [255]     |
| <i>Taricha torosa</i>           | 11.23    | 25               | 1.3364  |                 |                     | [255]     |
| <i>Taricha torosa</i>           | 9.87     | 25               | 0.4244  |                 |                     | [255]     |
| <i>Taricha torosa</i>           | 11       | 25               | 0.5555  |                 |                     | [255]     |
| <i>Taricha torosa</i>           | 12.5     | 25               | 1.0738  | 10.71949        | 1.994019            | [255]     |
| <i>Triturus cristatus</i>       | 7        | 10               | 0.385   | 7               | 3.531486            | [255]     |
| <i>Triturus vulgaris</i>        | 8.75     | 6                | 0.863   |                 |                     | [255]     |
| <i>Triturus vulgaris</i>        | 8.75     | 15               | 0.8127  |                 |                     | [255]     |
| <i>Triturus vulgaris</i>        | 8.75     | 25               | 1.6264  | 8.75            | 6.283769            | [255]     |
| <i>Pseudobranchius striatus</i> | 1.58     | 25               | 0.0932  |                 |                     | [255]     |
| <i>Pseudobranchius striatus</i> | 2.19     | 25               | 0.1116  |                 |                     | [255]     |
| <i>Pseudobranchius striatus</i> | 2.5      | 25               | 0.184   | 2.052802        | 0.347408            | [255]     |
| <i>Siren intermedia</i>         | 74.9     | 25               | 10.7631 |                 |                     | [255]     |
| <i>Siren intermedia</i>         | 13.7     | 25               | 0.4521  |                 |                     | [255]     |
| <i>Siren intermedia</i>         | 7        | 25               | 0.28    |                 |                     | [255]     |
| <i>Siren intermedia</i>         | 18.1     | 25               | 0.8661  | 18.98868        | 2.916406            | [255]     |
| <i>Siren lacertina</i>          | 601      | 5                | 2.0844  |                 |                     | [255]     |
| <i>Siren lacertina</i>          | 581      | 15               | 3.8114  |                 |                     | [255]     |
| <i>Siren lacertina</i>          | 172      | 20               | 4.6268  |                 |                     | [255]     |
| <i>Siren lacertina</i>          | 126      | 22               | 6.6654  |                 |                     | [255]     |
| <i>Siren lacertina</i>          | 628      | 25               | 9.0118  |                 |                     | [255]     |
| <i>Siren lacertina</i>          | 73       | 25               | 1.08    |                 |                     | [255]     |
| <i>Siren lacertina</i>          | 269      | 25               | 3.0397  |                 |                     | [255]     |
| <i>Siren lacertina</i>          | 1182     | 25               | 32.174  |                 |                     | [255]     |
| <i>Siren lacertina</i>          | 36       | 25               | 1.2679  | 251.1182        | 15.84462            | [255]     |
| <i>Bufo alvaris</i>             | 150.8    | 15               | 11.868  | 150.8           | 73.28244            | [255]     |

| Species                | Mass (g) | Temperature (°C) | MR     | Species Average |                     | Reference |
|------------------------|----------|------------------|--------|-----------------|---------------------|-----------|
|                        |          |                  |        | Mass (g)        | Q <sub>10</sub> SMR |           |
| <i>Bufo americanus</i> | 25.2     | 5                | 0.6081 |                 |                     | [255]     |
| <i>Bufo americanus</i> | 19       | 15               | 2.0934 |                 |                     | [255]     |
| <i>Bufo americanus</i> | 27       | 20               | 1.377  |                 |                     | [255]     |
| <i>Bufo americanus</i> | 50       | 20               | 1.39   |                 |                     | [255]     |
| <i>Bufo americanus</i> | 27.03    | 20               | 1.38   |                 |                     | [255]     |
| <i>Bufo americanus</i> | 27       | 20               | 1.377  |                 |                     | [255]     |
| <i>Bufo americanus</i> | 11       | 21.5             | 1.2815 |                 |                     | [255]     |
| <i>Bufo americanus</i> | 0.102    | 23               | 0.0247 |                 |                     | [255]     |
| <i>Bufo americanus</i> | 40.4     | 25               | 2.9371 |                 |                     | [255]     |
| <i>Bufo americanus</i> | 21.1     | 25               | 2.5873 | 14.63644        | 4.388652            | [255]     |
| <i>Bufo boreas</i>     | 72.7     | 5                | 4.0908 |                 |                     | [255]     |
| <i>Bufo boreas</i>     | 40.2     | 10               | 0.5548 |                 |                     | [255]     |
| <i>Bufo boreas</i>     | 47.3     | 10               | 0.6244 |                 |                     | [255]     |
| <i>Bufo boreas</i>     | 57.8     | 10               | 0.7283 |                 |                     | [255]     |
| <i>Bufo boreas</i>     | 46.4     | 14               | 4.9648 |                 |                     | [255]     |
| <i>Bufo boreas</i>     | 29.5     | 14               | 4.484  |                 |                     | [255]     |
| <i>Bufo boreas</i>     | 28.7     | 15               | 3.8706 |                 |                     | [255]     |
| <i>Bufo boreas</i>     | 40.2     | 20               | 1.3025 |                 |                     | [255]     |
| <i>Bufo boreas</i>     | 47.3     | 20               | 2.3177 |                 |                     | [255]     |
| <i>Bufo boreas</i>     | 57.8     | 20               | 1.052  |                 |                     | [255]     |
| <i>Bufo boreas</i>     | 2.5      | 20               | 0.25   |                 |                     | [255]     |
| <i>Bufo boreas</i>     | 27.3     | 25               | 2.64   |                 |                     | [255]     |
| <i>Bufo boreas</i>     | 53.8     | 25               | 5.5812 |                 |                     | [255]     |
| <i>Bufo boreas</i>     | 40.2     | 30               | 3.0512 |                 |                     | [255]     |
| <i>Bufo boreas</i>     | 47.3     | 30               | 2.4265 |                 |                     | [255]     |
| <i>Bufo boreas</i>     | 57.8     | 30               | 6.4852 | 37.28039        | 9.113253            | [255]     |
| <i>Bufo bufo</i>       | 28.59    | 6                | 2.037  |                 |                     | [255]     |
| <i>Bufo bufo</i>       | 76.13    | 6                | 1.7415 |                 |                     | [255]     |
| <i>Bufo bufo</i>       | 28.59    | 15               | 4.8389 |                 |                     | [255]     |
| <i>Bufo bufo</i>       | 76.13    | 15               | 2.8549 |                 |                     | [255]     |

| Species                | Mass (g) | Temperature (°C) | MR     | Species Average |                     | Reference |
|------------------------|----------|------------------|--------|-----------------|---------------------|-----------|
|                        |          |                  |        | Mass (g)        | Q <sub>10</sub> SMR |           |
| <i>Bufo bufo</i>       | 43       | 17               | 4.8246 |                 |                     | [255]     |
| <i>Bufo bufo</i>       | 29       | 20               | 4.901  |                 |                     | [255]     |
| <i>Bufo bufo</i>       | 29       | 20               | 3.915  |                 |                     | [255]     |
| <i>Bufo bufo</i>       | 28.59    | 25               | 4.5851 |                 |                     | [255]     |
| <i>Bufo bufo</i>       | 76.13    | 25               | 9.64   | 41.59717        | 21.19721            | [255]     |
| <i>Bufo calamita</i>   | 8.67     | 20               | 0.511  |                 |                     | [255]     |
| <i>Bufo calamita</i>   | 8.7      | 20               | 0.5046 | 8.684987        | 2.110727            | [255]     |
| <i>Bufo cognatus</i>   | 45.2     | 5                | 1.2792 |                 |                     | [255]     |
| <i>Bufo cognatus</i>   | 39.58    | 10               | 1.979  |                 |                     | [255]     |
| <i>Bufo cognatus</i>   | 50.5     | 15               | 3.8481 |                 |                     | [255]     |
| <i>Bufo cognatus</i>   | 39.58    | 20               | 4.4725 |                 |                     | [255]     |
| <i>Bufo cognatus</i>   | 40.2     | 25               | 2.9587 |                 |                     | [255]     |
| <i>Bufo cognatus</i>   | 39.58    | 30               | 7.2036 | 42.25199        | 15.82427            | [255]     |
| <i>Bufo debilis</i>    | 0.66     | 15               | 0.0845 | 0.66            | 0.52177             | [255]     |
| <i>Bufo marinus</i>    | 101      | 15               | 2.2877 |                 |                     | [255]     |
| <i>Bufo marinus</i>    | 145      | 15               | 1.5515 |                 |                     | [255]     |
| <i>Bufo marinus</i>    | 123.8    | 15               | 4.6276 |                 |                     | [255]     |
| <i>Bufo marinus</i>    | 1200     | 18.5             | 33.15  |                 |                     | [255]     |
| <i>Bufo marinus</i>    | 101      | 20               | 2.6088 |                 |                     | [255]     |
| <i>Bufo marinus</i>    | 156      | 20               | 3.042  |                 |                     | [255]     |
| <i>Bufo marinus</i>    | 152.5    | 22               | 7.32   |                 |                     | [255]     |
| <i>Bufo marinus</i>    | 252      | 22               | 11.088 |                 |                     | [255]     |
| <i>Bufo marinus</i>    | 101      | 25               | 3.1704 |                 |                     | [255]     |
| <i>Bufo marinus</i>    | 88.7     | 25               | 6.3447 |                 |                     | [255]     |
| <i>Bufo marinus</i>    | 101      | 30               | 5.7782 |                 |                     | [255]     |
| <i>Bufo marinus</i>    | 101      | 35               | 8.2669 | 149.0675        | 18.40474            | [255]     |
| <i>Bufo terrestris</i> | 21.4     | 5                | 0.6527 |                 |                     | [255]     |
| <i>Bufo terrestris</i> | 16.6     | 15               | 1.336  |                 |                     | [255]     |
| <i>Bufo terrestris</i> | 102      | 15               | 7.5    |                 |                     | [255]     |
| <i>Bufo terrestris</i> | 102      | 20               | 15.1   |                 |                     | [255]     |

| Species                         | Mass (g) | Temperature (°C) | MR     | Species Average |                     | Reference |
|---------------------------------|----------|------------------|--------|-----------------|---------------------|-----------|
|                                 |          |                  |        | Mass (g)        | Q <sub>10</sub> SMR |           |
| <i>Bufo terrestris</i>          | 19.8     | 25               | 2.2425 |                 |                     | [255]     |
| <i>Bufo terrestris</i>          | 102      | 25               | 30.42  |                 |                     | [255]     |
| <i>Bufo terrestris</i>          | 102      | 30               | 61.25  | 49.81609        | 27.89483            | [255]     |
| <i>Bufo viridis</i>             | 35       | 20               | 0.875  | 35              | 3.637106            | [255]     |
| <i>Bufo woodhousii</i>          | 67.4     | 10               | 1.2739 |                 |                     | [255]     |
| <i>Bufo woodhousii</i>          | 69       | 15               | 2.7255 |                 |                     | [255]     |
| <i>Bufo woodhousii</i>          | 64.8     | 20               | 4.4129 |                 |                     | [255]     |
| <i>Bufo woodhousii</i>          | 52.2     | 23               | 2.16   |                 |                     | [255]     |
| <i>Bufo woodhousii</i>          | 56.3     | 25               | 2.2351 |                 |                     | [255]     |
| <i>Bufo woodhousii</i>          | 9        | 25               | 1.017  | 44.69417        | 8.768712            | [255]     |
| <i>Colostethus inguinalis</i>   | 1.57     | 20               | 0.1366 |                 |                     | [255]     |
| <i>Colostethus inguinalis</i>   | 1.53     | 25               | 0.2127 | 1.549871        | 0.581326            | [255]     |
| <i>Colostethus nubicola</i>     | 0.28     | 20               | 0.0314 |                 |                     | [255]     |
| <i>Colostethus nubicola</i>     | 0.27     | 25               | 0.0435 | 0.274955        | 0.126043            | [255]     |
| <i>Colostethus trinitatus</i>   | 1        | 25               | 0.201  | 1               | 0.562431            | [255]     |
| <i>Dendrobates auratus</i>      | 2.09     | 20               | 0.1421 |                 |                     | [255]     |
| <i>Dendrobates auratus</i>      | 1.77     | 25               | 0.1593 | 1.923356        | 0.513116            | [255]     |
| <i>Phyllobates subpunctatus</i> | 1.5      | 15               | 0.108  | 1.5             | 0.666878            | [255]     |
| <i>Bombina orientalis</i>       | 2.62     | 20               | 0.149  |                 |                     | [255]     |
| <i>Bombina orientalis</i>       | 2.6      | 20               | 0.1456 | 2.609981        | 0.61224             | [255]     |
| <i>Discoglossus pictus</i>      | 30.71    | 20               | 1.142  |                 |                     | [255]     |
| <i>Discoglossus pictus</i>      | 30.7     | 20               | 1.1359 | 30.705          | 4.734248            | [255]     |
| <i>Acris crepitans</i>          | 1.935    | 5                | 0.0459 |                 |                     | [255]     |
| <i>Acris crepitans</i>          | 1.59     | 15               | 0.0477 |                 |                     | [255]     |
| <i>Acris crepitans</i>          | 1.735    | 15               | 0.1118 |                 |                     | [255]     |
| <i>Acris crepitans</i>          | 1.5      | 15               | 0.1155 |                 |                     | [255]     |
| <i>Acris crepitans</i>          | 0.5      | 15               | 0.0335 |                 |                     | [255]     |
| <i>Acris crepitans</i>          | 1.27     | 15               | 0.0838 |                 |                     | [255]     |
| <i>Acris crepitans</i>          | 0.9      | 15               | 0.0612 |                 |                     | [255]     |
| <i>Acris crepitans</i>          | 1.855    | 25               | 0.3288 |                 |                     | [255]     |

| Species                       | Mass (g) | Temperature (°C) | MR     | Species Average |                     | Reference |
|-------------------------------|----------|------------------|--------|-----------------|---------------------|-----------|
|                               |          |                  |        | Mass (g)        | Q <sub>10</sub> SMR |           |
| <i>Acris crepitans</i>        | 1.5      | 25               | 0.2535 |                 |                     | [255]     |
| <i>Acris crepitans</i>        | 0.5      | 25               | 0.117  | 1.203342        | 0.489127            | [255]     |
| <i>Agalychnis callidryas</i>  | 5.65     | 20               | 0.337  |                 |                     | [255]     |
| <i>Agalychnis callidryas</i>  | 5.7      | 20               | 0.3477 | 5.674945        | 1.42287             | [255]     |
| <i>Cyclorana platycephala</i> | 11       | 15               | 0.5907 | 11              | 3.64745             | [255]     |
| <i>Hyla arborea</i>           | 7.78     | 18.5             | 2.4429 | 7.78            | 11.43447            | [255]     |
| <i>Hyla arenicolor</i>        | 3.37     | 20               | 0.3    |                 |                     | [255]     |
| <i>Hyla arenicolor</i>        | 3.4      | 20               | 0.3162 | 3.384967        | 1.280234            | [255]     |
| <i>Hyla chrysoscelis</i>      | 3.9      | 10               | 0.1482 |                 |                     | [255]     |
| <i>Hyla chrysoscelis</i>      | 3.9      | 20               | 0.4368 |                 |                     | [255]     |
| <i>Hyla chrysoscelis</i>      | 5.47     | 20               | 0.7056 |                 |                     | [255]     |
| <i>Hyla chrysoscelis</i>      | 3.9      | 30               | 1.1365 | 4.244195        | 1.984096            | [255]     |
| <i>Hyla cinerea</i>           | 3.82     | 10               | 0.217  |                 |                     | [255]     |
| <i>Hyla cinerea</i>           | 6.4      | 15               | 0.8097 |                 |                     | [255]     |
| <i>Hyla cinerea</i>           | 3.82     | 20               | 0.5596 |                 |                     | [255]     |
| <i>Hyla cinerea</i>           | 8.9      | 22               | 1.513  |                 |                     | [255]     |
| <i>Hyla cinerea</i>           | 4.5      | 25               | 0.459  |                 |                     | [255]     |
| <i>Hyla cinerea</i>           | 5.1      | 27               | 0.689  |                 |                     | [255]     |
| <i>Hyla cinerea</i>           | 3.82     | 30               | 0.8488 | 4.950499        | 2.36997             | [255]     |
| <i>Hyla crepitans</i>         | 9.9      | 25               | 1.1484 | 9.9             | 3.213414            | [255]     |
| <i>Hyla crucifer</i>          | 0.85     | 14               | 0.1037 |                 |                     | [255]     |
| <i>Hyla crucifer</i>          | 1.3      | 20               | 0.1443 |                 |                     | [255]     |
| <i>Hyla crucifer</i>          | 1.31     | 20               | 0.149  |                 |                     | [255]     |
| <i>Hyla crucifer</i>          | 1.3      | 20               | 0.1443 |                 |                     | [255]     |
| <i>Hyla crucifer</i>          | 1.15     | 20               | 0.1265 | 1.166957        | 0.605223            | [255]     |
| <i>Hyla gratiosa</i>          | 10.2     | 5                | 0.5281 |                 |                     | [255]     |
| <i>Hyla gratiosa</i>          | 10.2     | 15               | 0.9081 |                 |                     | [255]     |
| <i>Hyla gratiosa</i>          | 9.8      | 25               | 1.4431 |                 |                     | [255]     |
| <i>Hyla gratiosa</i>          | 13.9     | 29               | 1.321  | 10.91089        | 4.576912            | [255]     |
| <i>Hyla maxima</i>            | 41.4     | 25               | 3.933  | 41.4            | 11.00519            | [255]     |

| Species                           | Mass (g) | Temperature (°C) | MR     | Species Average |                     | Reference |
|-----------------------------------|----------|------------------|--------|-----------------|---------------------|-----------|
|                                   |          |                  |        | Mass (g)        | Q <sub>10</sub> SMR |           |
| <i>Hyla regilla</i>               | 2.76     | 20               | 0.1656 |                 |                     | [255]     |
| <i>Hyla regilla</i>               | 2.27     | 21               | 0.089  | 2.503038        | 0.485049            | [255]     |
| <i>Hyla squirella</i>             | 2.2      | 27               | 0.363  | 2.2             | 0.867023            | [255]     |
| <i>Hyla versicolor</i>            | 8.3      | 5                | 0.5997 |                 |                     | [255]     |
| <i>Hyla versicolor</i>            | 8.3      | 15               | 0.8644 |                 |                     | [255]     |
| <i>Hyla versicolor</i>            | 8.62     | 19               | 0.6724 |                 |                     | [255]     |
| <i>Hyla versicolor</i>            | 6.09     | 20               | 0.6029 |                 |                     | [255]     |
| <i>Hyla versicolor</i>            | 7.6      | 25               | 1.5252 | 7.723584        | 4.264983            | [255]     |
| <i>Osteopilus septentrionalis</i> | 4.98     | 20               | 0.33   |                 |                     | [255]     |
| <i>Osteopilus septentrionalis</i> | 5        | 20               | 0.33   | 4.98999         | 1.371709            | [255]     |
| <i>Phyllomedusa sauvagei</i>      | 17.5     | 10               | 0.5075 |                 |                     | [255]     |
| <i>Phyllomedusa sauvagei</i>      | 17.5     | 15               | 0.77   |                 |                     | [255]     |
| <i>Phyllomedusa sauvagei</i>      | 17.5     | 25               | 1.8025 |                 |                     | [255]     |
| <i>Phyllomedusa sauvagei</i>      | 17.5     | 30               | 2.7475 |                 |                     | [255]     |
| <i>Phyllomedusa sauvagei</i>      | 17.5     | 35               | 4.1825 |                 |                     | [255]     |
| <i>Phyllomedusa sauvagei</i>      | 17.5     | 38               | 6.125  | 17.5            | 5.155052            | [255]     |
| <i>Pseudacris nigrata</i>         | 1        | 25               | 0.162  | 1               | 0.453303            | [255]     |
| <i>Pseudacris triseriata</i>      | 0.94     | 5                | 0.0141 |                 |                     | [255]     |
| <i>Pseudacris triseriata</i>      | 1.41     | 5                | 0.1695 |                 |                     | [255]     |
| <i>Pseudacris triseriata</i>      | 1.192    | 10               | 0.1774 |                 |                     | [255]     |
| <i>Pseudacris triseriata</i>      | 1.065    | 10               | 0.2556 |                 |                     | [255]     |
| <i>Pseudacris triseriata</i>      | 1.34     | 15               | 0.3015 |                 |                     | [255]     |
| <i>Pseudacris triseriata</i>      | 1.9      | 18.5             | 0.209  |                 |                     | [255]     |
| <i>Pseudacris triseriata</i>      | 1.125    | 20               | 0.2687 |                 |                     | [255]     |
| <i>Pseudacris triseriata</i>      | 1.056    | 20               | 0.4836 |                 |                     | [255]     |
| <i>Pseudacris triseriata</i>      | 0.94     | 25               | 0.1119 |                 |                     | [255]     |
| <i>Pseudacris triseriata</i>      | 1.31     | 25               | 0.5015 | 1.201447        | 1.117662            | [255]     |
| <i>Pterohyla fodiens</i>          | 15.13    | 20               | 0.514  |                 |                     | [255]     |
| <i>Pterohyla fodiens</i>          | 15.1     | 20               | 0.4832 | 15.11499        | 2.071538            | [255]     |
| <i>Smilisca baudinii</i>          | 23.7     | 15               | 1.5832 | 23.7            | 9.775932            | [255]     |



| Species                                | Mass (g) | Temperature (°C) | MR     | Species Average |                     | Reference |
|----------------------------------------|----------|------------------|--------|-----------------|---------------------|-----------|
|                                        |          |                  |        | Mass (g)        | Q <sub>10</sub> SMR |           |
| <i>Hyperolius marmoratus</i>           | 1        | 20               | 0.0671 | 1               | 0.278914            | [255]     |
| <i>Hyperolius parallelus</i>           | 1        | 20               | 0.0765 | 1               | 0.317987            | [255]     |
| <i>Hyperolius tuberilinguis</i>        | 1        | 20               | 0.0679 | 1               | 0.282239            | [255]     |
| <i>Hyperolius viridiflavus</i>         | 0.88     | 20               | 0.083  |                 |                     | [255]     |
| <i>Hyperolius viridiflavus</i>         | 0.9      | 20               | 0.0846 | 0.889944        | 0.348315            | [255]     |
| <i>Kassina senegalensis</i>            | 3.02     | 20               | 0.228  |                 |                     | [255]     |
| <i>Kassina senegalensis</i>            | 3        | 20               | 0.231  | 3.009983        | 0.953941            | [255]     |
| <i>Kassina weali</i>                   | 6.25     | 20               | 0.318  |                 |                     | [255]     |
| <i>Kassina weali</i>                   | 6.3      | 20               | 0.3402 | 6.27495         | 1.367189            | [255]     |
| <i>Ceratophrys calcarata</i>           | 55.5     | 25               | 2.967  |                 |                     | [255]     |
| <i>Ceratophrys calcarata</i>           | 4.0434   | 35               | 4.0434 | 14.98028        | 6.524259            | [255]     |
| <i>Eleutherodactylus coqui</i>         | 4.06     | 20               | 0.1786 |                 |                     | [255]     |
| <i>Eleutherodactylus coqui</i>         | 4.06     | 20               | 0.167  |                 |                     | [255]     |
| <i>Eleutherodactylus coqui</i>         | 4.1      | 20               | 0.1804 | 4.07329         | 0.728382            | [255]     |
| <i>Eleutherodactylus portoricensis</i> | 3.7      | 15               | 0.2566 | 3.7             | 1.584452            | [255]     |
| <i>Lepidobatrachus llanensis</i>       | 88.5     | 25               | 8.5845 | 88.5            | 24.02086            | [255]     |
| <i>Leptodactylus typhonus</i>          | 5.1      | 25               | 0.5865 | 5.1             | 1.641125            | [255]     |
| <i>Odontophrynus americanus</i>        | 15.24    | 20               | 0.549  |                 |                     | [255]     |
| <i>Odontophrynus americanus</i>        | 15.2     | 20               | 0.5624 | 15.21999        | 2.309706            | [255]     |
| <i>Physalaemus pustulosus</i>          | 1.72     | 25               | 0.26   |                 |                     | [255]     |
| <i>Physalaemus pustulosus</i>          | 2.9      | 25               | 0.3393 | 2.233383        | 0.831098            | [255]     |
| <i>Telmatobius culeus</i>              | 122.3    | 10               | 1.7244 |                 |                     | [255]     |
| <i>Telmatobius marmoratus</i>          | 18.4     | 10               | 0.92   | 47.43754        | 11.5534             | [255]     |
| <i>Gastrophryne carolinesis</i>        | 1.94     | 20               | 0.103  |                 |                     | [255]     |
| <i>Gastrophryne carolinesis</i>        | 1.9      | 20               | 0.0988 | 1.919896        | 0.419319            | [255]     |
| <i>Kaloula pulchra</i>                 | 30.66    | 20               | 0.89   |                 |                     | [255]     |
| <i>Kaloula pulchra</i>                 | 30.7     | 20               | 0.7982 | 30.67999        | 3.503473            | [255]     |
| <i>Microhyla carolinensis</i>          | 3.5      | 15               | 0.2315 | 3.5             | 1.429464            | [255]     |
| <i>Crinia parinsignifera</i>           | 0.653    | 5                | 0.0398 |                 |                     | [255]     |
| <i>Crinia parinsignifera</i>           | 0.597    | 10               | 0.0501 |                 |                     | [255]     |

| Species                      | Mass (g) | Temperature (°C) | MR     | Species Average |                     | Reference |
|------------------------------|----------|------------------|--------|-----------------|---------------------|-----------|
|                              |          |                  |        | Mass (g)        | Q <sub>10</sub> SMR |           |
| <i>Crinia parinsignifera</i> | 0.658    | 15               | 0.1073 |                 |                     | [255]     |
| <i>Crinia parinsignifera</i> | 0.63     | 20               | 0.1166 |                 |                     | [255]     |
| <i>Crinia parinsignifera</i> | 0.666    | 25               | 0.1765 |                 |                     | [255]     |
| <i>Crinia parinsignifera</i> | 0.452    | 30               | 0.1709 |                 |                     | [255]     |
| <i>Crinia parinsignifera</i> | 0.665    | 35               | 0.3757 | 0.612529        | 0.482199            | [255]     |
| <i>Crinia signifera</i>      | 0.683    | 5                | 0.041  |                 |                     | [255]     |
| <i>Crinia signifera</i>      | 0.908    | 5                | 0.0499 |                 |                     | [255]     |
| <i>Crinia signifera</i>      | 0.69     | 10               | 0.0593 |                 |                     | [255]     |
| <i>Crinia signifera</i>      | 0.968    | 10               | 0.0823 |                 |                     | [255]     |
| <i>Crinia signifera</i>      | 0.638    | 15               | 0.1078 |                 |                     | [255]     |
| <i>Crinia signifera</i>      | 0.853    | 15               | 0.1331 |                 |                     | [255]     |
| <i>Crinia signifera</i>      | 0.615    | 20               | 0.131  |                 |                     | [255]     |
| <i>Crinia signifera</i>      | 0.621    | 25               | 0.149  |                 |                     | [255]     |
| <i>Crinia signifera</i>      | 0.485    | 30               | 0.1761 |                 |                     | [255]     |
| <i>Crinia signifera</i>      | 0.612    | 35               | 0.399  | 0.69302         | 0.563904            | [255]     |
| <i>Scaphiopus bombifrons</i> | 13.3     | 15               | 1.851  | 13.3            | 11.42954            | [255]     |
| <i>Scaphiopus couchii</i>    | 26.9     | 15               | 2.2609 |                 |                     | [255]     |
| <i>Scaphiopus couchii</i>    | 24.6     | 21               | 1.8179 | 25.72431        | 9.872415            | [255]     |
| <i>Scaphiopus hammondii</i>  | 23.6     | 15               | 2.2163 |                 |                     | [255]     |
| <i>Scaphiopus hammondii</i>  | 1.55     | 15               | 0.2666 |                 |                     | [255]     |
| <i>Scaphiopus hammondii</i>  | 10.87    | 15               | 0.75   |                 |                     | [255]     |
| <i>Scaphiopus hammondii</i>  | 12.74    | 21               | 1.1466 | 8.436468        | 4.629675            | [255]     |
| <i>Scaphiopus holbrooki</i>  | 14       | 15               | 1.1712 | 14              | 7.231917            | [255]     |
| <i>Xenopus laevis</i>        | 30.03    | 15               | 1.6847 |                 |                     | [255]     |
| <i>Xenopus laevis</i>        | 63.6     | 15               | 2.1516 |                 |                     | [255]     |
| <i>Xenopus laevis</i>        | 33.3     | 15               | 1.9106 |                 |                     | [255]     |
| <i>Xenopus laevis</i>        | 67       | 17               | 4.2277 |                 |                     | [255]     |
| <i>Xenopus laevis</i>        | 67.3     | 17.3             | 3.834  |                 |                     | [255]     |
| <i>Xenopus laevis</i>        | 22.1     | 18               | 1.7901 |                 |                     | [255]     |
| <i>Xenopus laevis</i>        | 100      | 20               | 4.5    |                 |                     | [255]     |

| Species                       | Mass (g) | Temperature (°C) | MR      | Species Average |                     | Reference |
|-------------------------------|----------|------------------|---------|-----------------|---------------------|-----------|
|                               |          |                  |         | Mass (g)        | Q <sub>10</sub> SMR |           |
| <i>Xenopus laevis</i>         | 55       | 20               | 2.53    |                 |                     | [255]     |
| <i>Xenopus laevis</i>         | 139      | 20               | 3.8364  |                 |                     | [255]     |
| <i>Xenopus laevis</i>         | 122      | 22               | 5.5998  |                 |                     | [255]     |
| <i>Xenopus laevis</i>         | 41       | 25               | 3.526   |                 |                     | [255]     |
| <i>Xenopus laevis</i>         | 29.3     | 25               | 4.2     |                 |                     | [255]     |
| <i>Xenopus laevis</i>         | 23.9     | 25               | 3.824   |                 |                     | [255]     |
| <i>Xenopus laevis</i>         | 28.39    | 25               | 1.6063  |                 |                     | [255]     |
| <i>Xenopus laevis</i>         | 33.3     | 25               | 3.2218  | 47.90222        | 12.19345            | [255]     |
| <i>Xenopus mulleri</i>        | 24       | 17               | 2.5104  | 24              | 13.2317             | [255]     |
| <i>Conraua goliath</i>        | 251      | 25               | 18.86   | 251             | 52.77342            | [255]     |
| <i>Occidozyga martensii</i>   | 9.3      | 15               | 0.4167  |                 |                     | [255]     |
| <i>Occidozyga martensii</i>   | 9.3      | 20               | 0.524   |                 |                     | [255]     |
| <i>Occidozyga martensii</i>   | 9.3      | 25               | 0.8872  |                 |                     | [255]     |
| <i>Occidozyga martensii</i>   | 9.3      | 30               | 0.9402  |                 |                     | [255]     |
| <i>Occidozyga martensii</i>   | 9.3      | 35               | 1.0779  | 9.3             | 2.020545            | [255]     |
| <i>Pyxicephalus adspersus</i> | 562.3    | 20               | 14.22   | 562.3           | 59.10817            | [255]     |
| <i>Rana arvalis</i>           | 17       | 5                | 0.4233  |                 |                     | [255]     |
| <i>Rana arvalis</i>           | 17       | 10               | 0.9554  |                 |                     | [255]     |
| <i>Rana arvalis</i>           | 17       | 15               | 1.6337  |                 |                     | [255]     |
| <i>Rana arvalis</i>           | 17       | 20               | 2.8866  |                 |                     | [255]     |
| <i>Rana arvalis</i>           | 17       | 25               | 4.7685  |                 |                     | [255]     |
| <i>Rana arvalis</i>           | 17       | 30               | 7.6857  | 17              | 10.28241            | [255]     |
| <i>Rana aspersa</i>           | 563      | 18.5             | 31.6688 | 563             | 148.232             | [255]     |
| <i>Rana berlandieri</i>       | 70       | 29               | 7.035   | 70              | 14.34294            | [255]     |
| <i>Rana blythi</i>            | 88.7     | 25               | 4.3729  | 88.7            | 12.2361             | [255]     |
| <i>Rana cancrivora</i>        | 20.45    | 20               | 1.0409  |                 |                     | [255]     |
| <i>Rana cancrivora</i>        | 20.45    | 25               | 1.5767  |                 |                     | [255]     |
| <i>Rana cancrivora</i>        | 20.45    | 30               | 2.2597  |                 |                     | [255]     |
| <i>Rana cancrivora</i>        | 12.5     | 30               | 1.75    |                 |                     | [255]     |
| <i>Rana cancrivora</i>        | 20.45    | 35               | 4.1043  | 18.53261        | 4.254476            | [255]     |

| Species                   | Mass (g) | Temperature (°C) | MR      | Species Average |                     | Reference |
|---------------------------|----------|------------------|---------|-----------------|---------------------|-----------|
|                           |          |                  |         | Mass (g)        | Q <sub>10</sub> SMR |           |
| <i>Rana catesbeiana</i>   | 80.9     | 5                | 3.3638  |                 |                     | [255]     |
| <i>Rana catesbeiana</i>   | 262      | 5                | 1.3171  |                 |                     | [255]     |
| <i>Rana catesbeiana</i>   | 646      | 5                | 10.013  |                 |                     | [255]     |
| <i>Rana catesbeiana</i>   | 43.55    | 10               | 0.4355  |                 |                     | [255]     |
| <i>Rana catesbeiana</i>   | 47.3     | 15               | 2.7008  |                 |                     | [255]     |
| <i>Rana catesbeiana</i>   | 303.5    | 19               | 10.61   |                 |                     | [255]     |
| <i>Rana catesbeiana</i>   | 228.2    | 20               | 5.6137  |                 |                     | [255]     |
| <i>Rana catesbeiana</i>   | 300      | 20               | 7.2     |                 |                     | [255]     |
| <i>Rana catesbeiana</i>   | 277.5    | 20               | 6.9028  |                 |                     | [255]     |
| <i>Rana catesbeiana</i>   | 241      | 20               | 17.4725 |                 |                     | [255]     |
| <i>Rana catesbeiana</i>   | 43.55    | 20               | 1.6549  |                 |                     | [255]     |
| <i>Rana catesbeiana</i>   | 621      | 20               | 33.0993 |                 |                     | [255]     |
| <i>Rana catesbeiana</i>   | 503      | 21.5             | 18.6739 |                 |                     | [255]     |
| <i>Rana catesbeiana</i>   | 175      | 22.5             | 7.525   |                 |                     | [255]     |
| <i>Rana catesbeiana</i>   | 14       | 25               | 2.1     |                 |                     | [255]     |
| <i>Rana catesbeiana</i>   | 251      | 25               | 13.052  |                 |                     | [255]     |
| <i>Rana catesbeiana</i>   | 350      | 25               | 15.05   |                 |                     | [255]     |
| <i>Rana catesbeiana</i>   | 269      | 25               | 25.017  |                 |                     | [255]     |
| <i>Rana catesbeiana</i>   | 43.55    | 30               | 3.7889  | 164.9262        | 28.33457            | [255]     |
| <i>Rana chalconota</i>    | 4.1      | 25               | 0.3911  | 4.1             | 1.094363            | [255]     |
| <i>Rana clamitans</i>     | 31       | 5                | 0.5397  |                 |                     | [255]     |
| <i>Rana clamitans</i>     | 34.2     | 14               | 1.7442  |                 |                     | [255]     |
| <i>Rana clamitans</i>     | 34       | 15               | 1.6085  |                 |                     | [255]     |
| <i>Rana clamitans</i>     | 19       | 21.5             | 2.1684  |                 |                     | [255]     |
| <i>Rana clamitans</i>     | 32.5     | 25               | 2.7008  | 29.47818        | 8.757302            | [255]     |
| <i>Rana cyanophlyctis</i> | 0.142    | 29               | 0.1729  |                 |                     | [255]     |
| <i>Rana cyanophlyctis</i> | 0.294    | 29               | 0.2157  | 0.204323        | 0.393728            | [255]     |
| <i>Rana erythraea</i>     | 19       | 15               | 0.1786  |                 |                     | [255]     |
| <i>Rana erythraea</i>     | 19       | 20               | 0.7809  |                 |                     | [255]     |
| <i>Rana erythraea</i>     | 19       | 25               | 1.6245  |                 |                     | [255]     |

| Species                   | Mass (g) | Temperature (°C) | MR      | Species Average |                     | Reference |
|---------------------------|----------|------------------|---------|-----------------|---------------------|-----------|
|                           |          |                  |         | Mass (g)        | Q <sub>10</sub> SMR |           |
| <i>Rana erythraea</i>     | 19       | 30               | 2.1299  |                 |                     | [255]     |
| <i>Rana erythraea</i>     | 19       | 35               | 3.8703  | 19              | 3.170543            | [255]     |
| <i>Rana esculenta</i>     | 50.32    | 6                | 0.8617  |                 |                     | [255]     |
| <i>Rana esculenta</i>     | 17.5     | 7                | 0.2468  |                 |                     | [255]     |
| <i>Rana esculenta</i>     | 31.2     | 7                | 0.5887  |                 |                     | [255]     |
| <i>Rana esculenta</i>     | 28.4     | 12               | 1.9937  |                 |                     | [255]     |
| <i>Rana esculenta</i>     | 22.15    | 12               | 1.91    |                 |                     | [255]     |
| <i>Rana esculenta</i>     | 28.4     | 12               | 2.1953  |                 |                     | [255]     |
| <i>Rana esculenta</i>     | 28       | 15               | 0.8176  |                 |                     | [255]     |
| <i>Rana esculenta?</i>    | 57.2     | 15               | 2.5225  |                 |                     | [255]     |
| <i>Rana esculenta</i>     | 50.32    | 15               | 4.4533  |                 |                     | [255]     |
| <i>Rana esculenta</i>     | 36       | 17               | 3.4488  |                 |                     | [255]     |
| <i>Rana esculenta</i>     | 30       | 18.5             | 6.327   |                 |                     | [255]     |
| <i>Rana esculenta</i>     | 116      | 18.5             | 9.3612  |                 |                     | [255]     |
| <i>Rana esculenta</i>     | 45.3     | 20               | 4.3941  |                 |                     | [255]     |
| <i>Rana esculenta</i>     | 16.4     | 20               | 1.3874  |                 |                     | [255]     |
| <i>Rana esculenta</i>     | 28.8     | 20               | 3.7037  |                 |                     | [255]     |
| <i>Rana esculenta</i>     | 15.2     | 23               | 0.2523  |                 |                     | [255]     |
| <i>Rana esculenta</i>     | 34.5     | 24               | 5.988   |                 |                     | [255]     |
| <i>Rana esculenta</i>     | 50.32    | 25               | 4.1954  | 33.48308        | 11.50439            | [255]     |
| <i>Rana hexadactyla</i>   | 51.9     | 29               | 11.9889 |                 |                     | [255]     |
| <i>Rana hexadactyla</i>   | 30       | 29               | 7.35    | 39.45884        | 19.13847            | [255]     |
| <i>Rana magna</i>         | 34.2     | 20               | 1.4022  |                 |                     | [255]     |
| <i>Rana magna</i>         | 34.2     | 30               | 2.8523  | 34.2            | 5.595979            | [255]     |
| <i>Rana muscosa</i>       | 13.5     | 4                | 0.099   |                 |                     | [255]     |
| <i>Rana muscosa</i>       | 18       | 15               | 0.6061  | 15.58846        | 2.33762             | [255]     |
| <i>Rana nicobariensis</i> | 2.6      | 25               | 0.2561  | 2.6             | 0.71661             | [255]     |
| <i>Rana palustris</i>     | 14.7     | 15               | 0.9412  |                 |                     | [255]     |
| <i>Rana palustris</i>     | 36       | 21.5             | 3.672   | 23.00435        | 8.875571            | [255]     |
| <i>Rana pipiens</i>       | 33.5     | 5                | 0.529   |                 |                     | [255]     |

| Species               | Mass (g) | Temperature (°C) | MR     | Species Average |                     | Reference |
|-----------------------|----------|------------------|--------|-----------------|---------------------|-----------|
|                       |          |                  |        | Mass (g)        | Q <sub>10</sub> SMR |           |
| <i>Rana pipiens</i>   | 25       | 5                | 0.7025 |                 |                     | [255]     |
| <i>Rana pipiens</i>   | 34.8     | 10               | 0.4907 |                 |                     | [255]     |
| <i>Rana pipiens</i>   | 38.39    | 10               | 1.6124 |                 |                     | [255]     |
| <i>Rana pipiens</i>   | 31.8     | 15               | 1.1528 |                 |                     | [255]     |
| <i>Rana pipiens</i>   | 25       | 15               | 1.2918 |                 |                     | [255]     |
| <i>Rana pipiens</i>   | 43.7     | 15               | 2.88   |                 |                     | [255]     |
| <i>Rana pipiens</i>   | 32.5     | 15               | 1.628  |                 |                     | [255]     |
| <i>Rana pipiens</i>   | 32       | 17               | 2.912  |                 |                     | [255]     |
| <i>Rana pipiens</i>   | 26.5     | 19               | 1.68   |                 |                     | [255]     |
| <i>Rana pipiens</i>   | 34.8     | 20               | 1.5208 |                 |                     | [255]     |
| <i>Rana pipiens</i>   | 27.5     | 20               | 2.64   |                 |                     | [255]     |
| <i>Rana pipiens</i>   | 38.39    | 20               | 3.6854 |                 |                     | [255]     |
| <i>Rana pipiens</i>   | 49       | 20               | 3.5476 |                 |                     | [255]     |
| <i>Rana pipiens</i>   | 33.6     | 21.5             | 2.982  |                 |                     | [255]     |
| <i>Rana pipiens</i>   | 49.5     | 22               | 6.5046 |                 |                     | [255]     |
| <i>Rana pipiens</i>   | 52.6     | 22               | 3.4032 |                 |                     | [255]     |
| <i>Rana pipiens</i>   | 30       | 23               | 4.68   |                 |                     | [255]     |
| <i>Rana pipiens</i>   | 25       | 24               | 4      |                 |                     | [255]     |
| <i>Rana pipiens</i>   | 37.1     | 24               | 4.69   |                 |                     | [255]     |
| <i>Rana pipiens</i>   | 35       | 25               | 3.255  |                 |                     | [255]     |
| <i>Rana pipiens</i>   | 32       | 25               | 4.352  |                 |                     | [255]     |
| <i>Rana pipiens</i>   | 35.24    | 25               | 3.4433 |                 |                     | [255]     |
| <i>Rana pipiens</i>   | 44.3     | 25               | 5.64   |                 |                     | [255]     |
| <i>Rana pipiens</i>   | 25       | 25               | 3.028  |                 |                     | [255]     |
| <i>Rana pipiens</i>   | 42       | 25               | 3.276  |                 |                     | [255]     |
| <i>Rana pipiens</i>   | 32.5     | 25               | 4.147  |                 |                     | [255]     |
| <i>Rana pipiens</i>   | 27.5     | 30               | 4.29   |                 |                     | [255]     |
| <i>Rana pipiens</i>   | 34.8     | 30               | 4.6945 |                 |                     | [255]     |
| <i>Rana pipiens</i>   | 38.39    | 30               | 5.7585 | 34.17816        | 10.7216             | [255]     |
| <i>Rana ridibunda</i> | 35       | 20               | 1.12   |                 |                     | [255]     |

| Species                | Mass (g) | Temperature (°C) | MR     | Species Average |                     | Reference |
|------------------------|----------|------------------|--------|-----------------|---------------------|-----------|
|                        |          |                  |        | Mass (g)        | Q <sub>10</sub> SMR |           |
| <i>Rana ridibunda</i>  | 35.2     | 20               | 23.936 |                 |                     | [255]     |
| <i>Rana ridibunda</i>  | 47.5     | 23               | 4.0375 | 38.8241         | 18.30208            | [255]     |
| <i>Rana sylvatica</i>  | 9        | 5                | 0.4862 |                 |                     | [255]     |
| <i>Rana sylvatica</i>  | 8.8      | 14               | 0.5896 |                 |                     | [255]     |
| <i>Rana sylvatica</i>  | 7.4      | 15               | 0.7319 |                 |                     | [255]     |
| <i>Rana sylvatica</i>  | 12.7     | 20               | 1.0795 |                 |                     | [255]     |
| <i>Rana sylvatica</i>  | 12.67    | 20               | 1.098  |                 |                     | [255]     |
| <i>Rana sylvatica</i>  | 12.7     | 20               | 1.0795 |                 |                     | [255]     |
| <i>Rana sylvatica</i>  | 6        | 25               | 0.648  | 9.538913        | 4.10549             | [255]     |
| <i>Rana temporaria</i> | 38.53    | 6                | 1.0066 |                 |                     | [255]     |
| <i>Rana temporaria</i> | 44       | 9.5              | 1.21   |                 |                     | [255]     |
| <i>Rana temporaria</i> | 38       | 10               | 0.8143 |                 |                     | [255]     |
| <i>Rana temporaria</i> | 53       | 10.4             | 2.332  |                 |                     | [255]     |
| <i>Rana temporaria</i> | 30       | 14               | 0.356  |                 |                     | [255]     |
| <i>Rana temporaria</i> | 39       | 15               | 0.28   |                 |                     | [255]     |
| <i>Rana temporaria</i> | 38.53    | 15               | 2.6008 |                 |                     | [255]     |
| <i>Rana temporaria</i> | 35       | 15.1             | 0.49   |                 |                     | [255]     |
| <i>Rana temporaria</i> | 43       | 1                | 3.3712 |                 |                     | [255]     |
| <i>Rana temporaria</i> | 38       | 19               | 1.5831 |                 |                     | [255]     |
| <i>Rana temporaria</i> | 39.6     | 19.2             | 2.7166 |                 |                     | [255]     |
| <i>Rana temporaria</i> | 15.8     | 20               | 1.58   |                 |                     | [255]     |
| <i>Rana temporaria</i> | 37.5     | 20               | 5.8875 |                 |                     | [255]     |
| <i>Rana temporaria</i> | 25       | 20               | 1.75   |                 |                     | [255]     |
| <i>Rana temporaria</i> | 53       | 22               | 6.095  |                 |                     | [255]     |
| <i>Rana temporaria</i> | 42.5     | 23               | 4.3775 |                 |                     | [255]     |
| <i>Rana temporaria</i> | 21.6     | 24.6             | 3.456  |                 |                     | [255]     |
| <i>Rana temporaria</i> | 31.1     | 24.8             | 3.9373 |                 |                     | [255]     |
| <i>Rana temporaria</i> | 38.53    | 25               | 7.5037 |                 |                     | [255]     |
| <i>Rana temporaria</i> | 32.8     | 26.3             | 2.0697 | 35.45884        | 10.03813            | [255]     |
| <i>Rana virgatipes</i> | 7        | 5                | 0.14   |                 |                     | [255]     |

| Species                            | Mass (g) | Temperature (°C) | MR     | Species Average |                     | Reference |
|------------------------------------|----------|------------------|--------|-----------------|---------------------|-----------|
|                                    |          |                  |        | Mass (g)        | Q <sub>10</sub> SMR |           |
| <i>Rana virgatipes</i>             | 7        | 15               | 0.35   |                 |                     | [255]     |
| <i>Rana virgatipes</i>             | 7        | 25               | 1.015  | 7               | 2.270787            | [255]     |
| <i>Chiromantis petersi</i>         | 9        | 25               | 0.729  |                 |                     | [255]     |
| <i>Chiromantis petersi</i>         | 11.2     | 25               | 0.7952 | 10.03992        | 2.13047             | [255]     |
| <i>Boulengerula taitanus</i>       | 5        | 20               | 0.3175 |                 |                     | [255]     |
| <i>Boulengerula taitanus</i>       | 5        | 25               | 0.4205 |                 |                     | [255]     |
| <i>Boulengerula taitanus</i>       | 5        | 35               | 0.86   | 5               | 1.191932            | [255]     |
| <i>Geotrypetes seraphini</i>       | 1.93     | 20               | 0.0714 | 1.93            | 0.296788            | [255]     |
| <i>Typhlonectes compressicauda</i> | 135      | 20               | 4.52   |                 |                     | [255]     |
| <i>Typhlonectes compressicauda</i> | 64       | 25               | 9.546  |                 |                     | [255]     |
| <i>Typhlonectes compressicauda</i> | 138      | 25               | 11.253 |                 |                     | [255]     |
| <i>Typhlonectes compressicauda</i> | 30.62    | 25               | 1.442  | 77.73194        | 15.89061            | [255]     |

- Casey, T.M., P.C. Withers, and K.K. Casey, *Metabolic and respiratory responses of Arctic mammals to ambient temperature during summer*. Comparative Biochemistry and Physiology A, 1979. **64**: p. 331-341.
- Golightly, R.T., Jr. and R.D. Ohmart, *Metabolism and body temperature of 2 desert canids: Coyotes (Canis latrans) and kit foxes (Vulpes macrotis)*. Journal of Mammalogy, 1983. **64**(4): p. 624-635.
- Downs, C.T., et al., *Thermal parameters of serval Felis serval (Felidae) and blackbacked jackal Canis mesomelas (Canidae)*. Journal of Thermal Biology, 1991. **16**(5): p. 277-280.
- Hennemann, W.W., III., S.D. Thompson, and M.J. Konecny, *Metabolism of crab-eating foxes, Cerdocyon thous: Ecological influences on the energetics of canids*. Physiological Zoology, 1983. **56**(3): p. 319-324.
- Maloiy, G.M.O., et al., *Thermoregulation and metabolism in a small desert carnivore: the Fennec fox (Fennecus zerda) (Mammalia)*. Journal of Zoology, 1982. **198**(3): p. 279-291.
- McNab, B.K., *Body weight and the energetics of temperature regulation*. Journal of Experimental Biology, 1970. **53**: p. 329-348.
- Taylor, C.R. and V.J. Rowntree, *Temperature regulation and heat balance in running cheetahs: a strategy for sprinters?* American Journal of Physiology, 1973. **224**: p. 848-851.
- McNab, B.K., *The standard energetics of mammalian carnivores: Felidae and Hyaenidae*. Canadian Journal of Zoology, 2000. **78**(12): p. 2227-2239.



9. Kamau, J.M.Z., K. Johansen, and G.M.O. Maloiy, *Thermoregulation and standard metabolism of the slender mongoose (Herpestes sanguineus)*. *Physiological Zoology*, 1979. **52**(4): p. 594-602.
10. Ebisu, R.J. and G.C. Whittow, *Temperature regulation in the small indian mongoose (Herpestes auropunctatus)*. *Comparative Biochemistry and Physiology A*, 1976. **54**: p. 309-313.
11. Lovegrove, B.G., *The zoogeography of mammalian basal metabolic rate*. *American Naturalist*, 2000. **156**(2): p. 201-219.
12. McNab, B.K., *Energy expenditure and conservation in frugivorous and mixed-diet carnivorans*. *Journal of Mammalogy*, 1995. **76**(1): p. 206-222.
13. Iversen, J.A., *Basal energy metabolism of Mustelids*. *Journal of Comparative Physiology*, 1972. **81**: p. 341-344.
14. Kruuk, H., P.T. Taylor, and G.A.T. Mom, *Body temperature and foraging behaviour of the Eurasian otter (Lutra lutra), in relation to water temperature*. *Journal of Zoology*, 1997. **241**(4): p. 689-697.
15. Worthen, G.L. and D.L. Kilgore, Jr., *Metabolic rate of pine marten in relation to air temperature*. *Journal of Mammalogy*, 1981. **62**: p. 624-628.
16. Heusner, A.A., *Size and power in mammals*. *Journal of Experimental Biology*, 1991. **160**: p. 25-54.
17. Farrell, D.J. and A.J. Wood, *The nutrition of the female mink (Mustela vison). I. The metabolic rate of the mink*. *Canadian Journal of Zoology*, 1968. **46**: p. 41-45.
18. Knudsen, K.L. and D.L. Kilgore, Jr, *Temperature regulation and basal metabolic rate in the spotted skunk, Spilogale putorius*. *Comparative Biochemistry and Physiology A*, 1990. **97**(1): p. 27-34.
19. Harlow, H.J., *Torpor and other physiological adaptations of the badger (Taxidea taxus) to cold environments*. *Physiological Zoology*, 1981. **54**(3): p. 267-275.
20. Genoud, M., F.J. Bonaccorso, and A. Arends, *Rate of metabolism and temperature regulation in two small tropical insectivorous bats (Peropteryx macrotis and Natalus tumidirostris)*. *Comparative Biochemistry and Physiology A*, 1990. **97**(2): p. 229-234.
21. Genoud, M. and F.J. Bonaccorso, *Temperature regulation, rate of metabolism, and roost temperature in the greater white-lined bat Saccopteryx bilineata (Emballonuridae)*. *Physiological Zoology*, 1986. **59**: p. 49-54.
22. McNab, B.K., *Brain size and its relation to the rate of metabolism in mammals*. *American Naturalist*, 1989. **133**(2): p. 157-167.
23. Baudinette, R.V., et al., *Energy, water balance and the roost microenvironment in three Australian cave-dwelling bats (Microchiroptera)*. *Journal of Comparative Physiology B*, 2000. **170**: p. 439-446.
24. McNab, B.K., *The economics of temperature regulation in neotropical bats*. *Comparative Biochemistry and Physiology*, 1969. **31**: p. 227-268.
25. Geiser, F., *Reduction of metabolism during hibernation and daily torpor in mammals and birds: Temperature effect or physiological inhibition?* *Journal of Comparative Physiology B*, 1988. **158**(1): p. 25-38.

26. Rodriguez-Duran, A., *Metabolic rates and thermal conductance in four species of neotropical bats roosting in hot caves*. Comparative Biochemistry and Physiology A, 1995. **110**(4): p. 347-355.
27. Bonaccorso, F.J., et al., *Thermal ecology of moustached and ghost-faced bats (Mormoopidae) in Venezuela*. Journal of Mammalogy, 1992. **73**(2): p. 365-378.
28. Bell, G.P., G.A. Bartholomew, and K.A. Nagy, *The roles of energetics, water economy, foraging behaviour, and geothermal refugia in the distribution of the bat, Macrotus californicus*. Journal of Comparative Physiology B, 1986. **156**: p. 441-450.
29. McNab, B.K. and F.J. Bonaccorso, *The metabolism of New Guinean pteropodid bats*. Journal of Comparative Physiology B, 2001. **171**(3): p. 201-214.
30. Hosken, D.J., *Thermal biology and metabolism of the greater long-eared bat, Nyctophilus major (Chiroptera: Vespertilionidae)*. Australian Journal of Zoology, 1997. **45**(2): p. 145-156.
31. Hosken, D.J. and P.C. Withers, *Temperature regulation and metabolism of an Australian bat, Chalinolobus gouldii (Chiroptera: Vespertilionidae) when euthermic and torpid*. Journal of Comparative Physiology B, 1997. **167**(1): p. 71-80.
32. RübSamen, K., et al., *Water and energy metabolism in the rock hyrax (Procavia habessinica)*. Journal of Comparative Physiology, 1979. **131**: p. 303-310.
33. Taylor, C.R. and J.B. Sale, *Temperature regulation in the hyrax*. Comparative Biochemistry and Physiology, 1969. **31**: p. 903-907.
34. Dawson, T.J., "*Primitive*" Mammals, in *Comparative physiology of thermoregulation*, G.C. Whittow, Editor. 1973, Academic Press: New York. p. 1-46.
35. Withers, P.C., *Bioenergetics of a 'primitive' mammal, the Cape golden mole*. South African Journal of Science, 1978. **74**: p. 347-348.
36. Bennett, N.C., et al., *Thermoregulation in three species of Afrotropical subterranean mole-rats (Rodentia: Bathyergidae) from Zambia and Angola and scaling within the genus Cryptomys*. Oecologia, 1994. **97**(2): p. 222-227.
37. Seymour, R.S., P.C. Withers, and W.W. Weathers, *Energetics of burrowing, running, and free-living in the Namib desert golden mole (Eremitalpa namibensis)*. Journal of Zoology, 1998. **244**(1): p. 107-117.
38. McNab, B.K., *Energetics and the limits to a temperate distribution in armadillos*. Journal of Mammalogy, 1980. **61**(4): p. 606-627.
39. Whittow, G.C., E. Gould, and D. Rand, *Body temperature, oxygen consumption, and evaporative water loss in a primitive insectivore, the moon rat, Echinorex gymnurus*. Journal of Mammalogy, 1977. **58**: p. 233-235.
40. Król, E., *Metabolism and thermoregulation in the eastern hedgehog Erinaceus concolor*. Journal of Comparative Physiology B, 1994. **164**(6): p. 503-507.
41. Shkolnik, A. and K. Schmidt-Nielsen, *Temperature regulation in hedgehogs from temperate and desert environments*. Physiological Zoology, 1976. **49**: p. 56-64.

42. Genoud, M. and M. Ruedi, *Rate of metabolism, temperature relations, and evaporative water loss in the lesser gymnure Hylomys suillus (Insectivora, Mammalia)*. Journal of Zoology, 1996. **240**(2): p. 309-316.
43. Symonds, M.R.E., *Life history of the Insectivora: the role of phylogeny, metabolism and sex differences*. Journal of Zoology, 1999. **249**: p. 315-337.
44. Campbell, K.L., I.W. McIntyre, and R.A. MacArthur, *Fasting metabolism and thermoregulatory competence of the star-nosed mole, Condylura cristata (Talpidae: Condylurinae)*. Comparative Biochemistry and Physiology A, 1999. **123**(3): p. 293-298.
45. Campbell, K.L. and P.W. Hochachka, *Thermal biology and metabolism of the American shrew-mole, Neurotrichus gibbsii*. Journal of Mammalogy, 2000. **81**(2): p. 578-585.
46. Lovegrove, B.G., *The cost of burrowing by the social mole rats (Bathyergidae) Cryptomys damarensis and Heterocephalus glaber: the role of soil moisture*. Physiological Zoology, 1989. **62**(2): p. 449-469.
47. McNab, B.K., *The influence of body size on the energetics and distribution of fossorial and burrowing mammals*. Ecology, 1979. **60**(5): p. 1010-1021.
48. Stephenson, P.J. and P.A. Racey, *Reproductive energetics of the Tenrecidae (Mammalia: Insectivora). II. The shrew-tenrecs, Microgale spp.* Physiological Zoology, 1993. **66**: p. 664-685.
49. Stephenson, P.J. and P.A. Racey, *Reproductive energetics of the Tenrecidae (Mammalia: Insectivora). I. The large-eared tenrec, Geogale aurita*. Physiological Zoology, 1993. **66**: p. 643-663.
50. Downs, C.T. and M.R. Perrin, *The thermal biology of three southern African elephant-shrews*. Journal of Thermal Biology, 1995. **20**(6): p. 445-450.
51. McNab, B.K., *Physiological convergence amongst ant-eating and termite-eating mammals*. Journal of Zoology, 1984. **203**: p. 485-510.
52. Lovegrove, B.G., J. Raman, and M.R. Perrin, *Heterothermy in elephant shrews, Elephantulus spp. (Macroscelidea): Daily torpor or hibernation?* Journal of Comparative Physiology B, 2001. **171**(1): p. 1-10.
53. Roxburgh, L. and M.R. Perrin, *Temperature regulation and activity pattern of the round-eared elephant shrew Macroscelides proboscideus*. Journal of Thermal Biology, 1994. **19**(1): p. 13-20.
54. Heath, M.E. and H.T. Hammel, *Body temperature and rate of oxygen consumption in Chinese pangolins*. American Journal of Physiology, 1986. **250**(3(2)): p. R377-R382.
55. Ross, C., *Basal metabolic rate, body weight and diet in primates: An evaluation of the evidence*. Folia Primatologica, 1992. **58**(1): p. 7-23.
56. Robinson, E.L., V.H. DeMaria-Pesce, and C.A. Fuller, *Circadian rhythms of thermoregulation in the squirrel monkey (Saimiri sciureus)*. American Journal of Physiology, 1993. **265**(4 PART 2): p. R781-R785.

57. Knox, C.M. and P.G. Wright, *Thermoregulation and energy metabolism in the lesser bushbaby, Galago senegalensis moholi*. South African Journal of Zoology, 1989. **24**: p. 89-94.
58. Arends, A. and B.K. McNab, *The comparative energetics of 'caviomorph' rodents*. Comparative Biochemistry and Physiology A, 2001. **130**: p. 105-122.
59. Lovegrove, B.G., *Thermoregulation of the subterranean rodent genus Bathyergus (Bathyergidae)*. South African Journal of Zoology, 1986. **21**(4): p. 283-288.
60. Lovegrove, B.G. and C. Wissel, *Sociality in mole-rats. Metabolic scaling and the role of risk sensitivity*. Oecologia, 1988. **74**: p. 600-606.
61. Bennett, N.C., B.C. Clarke, and J.U.M. Jarvis, *A comparison of metabolic acclimation in two species of social mole-rats (Rodentia, Bathyergidae) in southern Africa*. Journal of Arid Environments, 1992. **22**: p. 189-198.
62. Bennett, N.C., J.U.M. Jarvis, and F.P.D. Cotterill, *Poikilothermic traits and thermoregulation in the Afrotropical social subterranean Mashona mole-rat (Cryptomys hottentotus darlingi) (Rodentia: Bathyergidae)*. Journal of Zoology, 1993. **231**(2): p. 179-186.
63. Marhold, S. and A. Nagel, *The energetics of the common mole rat Cryptomys, a subterranean eusocial rodent from Zambia*. Journal of Comparative Physiology B, 1995. **164**(8): p. 636-645.
64. Du Toit, J.T., J.U.M. Jarvis, and G.N. Louw, *Nutrition and burrowing energetics of the Cape mole-rat Georychus capensis*. Oecologia, 1985. **66**(1): p. 81-87.
65. Lovegrove, B.G., *Thermoregulation in the subterranean rodent Georychus capensis (Rodentia: Bathyergidae)*. Physiological Zoology, 1987. **60**(1): p. 174-180.
66. McNab, B.K., *The metabolism of fossorial rodents - A study of convergence*. Ecology, 1966. **47**(5): p. 712-733.
67. Withers, P.C. and J.U.M. Jarvis, *The effect of huddling on thermoregulation and oxygen consumption for the naked mole-rat*. Comparative Biochemistry and Physiology A, 1980. **66**: p. 215-219.
68. Busch, C., *Metabolic rate and thermoregulation in two species of tuco-tuco Ctenomys talarum and Ctenomys australis (Caviomorpha, Octodontidae)*. Comparative Biochemistry and Physiology A, 1989. **93**(2): p. 345-348.
69. McNab, B.K., *Complications inherent in scaling the basal rate of metabolism in mammals*. Quarterly Review of Biology, 1988. **63**(1): p. 25-54.
70. Cortés, A., et al., *Thermal biology of the fossorial rodent Ctenomys fulvus from the Atacama desert, northern Chile*. Journal of Thermal Biology, 2000. **25**(6): p. 425-430.
71. Hart, J.S., *Rodents*, in *Comparative physiology of thermoregulation*, G.C. Whittow, Editor. 1971, Academic Press: New York. p. 1-149.
72. Hooper, E.T. and M.E. Hilali, *Temperature regulation and habits in two species of jerboa, genus Jaculus*. Journal of Mammalogy, 1972. **53**: p. 574-593.

73. Brower, J.E. and T.J. Cade, *Ecology and physiology of Napaeozapus insignis (Miller) and other woodland mice*. Ecology, 1966. **47**: p. 46-63.
74. Bradley, W.G. and M.K. Yousef, *Thermoregulatory responses of the plains pocket gopher, Geomys bursaris*. Comparative Biochemistry and Physiology A, 1975. **52**: p. 35-38.
75. Ross, J.P., *Seasonal variation of thermoregulation in the Florida pocket gopher, Geomys pinetis*. Comparative Biochemistry and Physiology A, 1980. **66**(1): p. 119-126.
76. Vleck, D., *The energy cost of burrowing by the pocket gopher Thomomys bottae*. Physiological Zoology, 1979. **52**(2): p. 122-136.
77. Bradley, W.G., J.S. Miller, and M.K. Yousef, *Thermoregulatory patterns in pocket gophers: Desert and mountain*. Physiological Zoology, 1974. **47**: p. 172-179.
78. Gettinger, R.D., *Metabolism and thermoregulation of a fossorial rodent, the northern pocket gopher (Thomomys talpoides)*. Physiological Zoology, 1975. **48**(4): p. 311-322.
79. Hinds, D.S. and R.E. MacMillen, *Scaling of energy metabolism and evaporative water loss in heteromyid rodents*. Physiological Zoology, 1985. **58**(3): p. 282-298.
80. Tucker, V.A., *Oxygen consumption, thermal conductance, and torpor in the California pocket mouse Perognathus californicus*. Journal of Cellular and Comparative Physiology, 1965. **65**: p. 393-403.
81. Wang, L.C. and J.W. Hudson, *Some physiological aspects of temperature regulation in the normothermic and torpid hispid pocket mouse, Perognathus hispidus*. Comparative Biochemistry and Physiology, 1970. **32**: p. 275-296.
82. Carpenter, R.E., *A comparison of thermoregulation and water metabolism in the kangaroo rats Dipodomys agilis and Dipodomys Merriami*. University of California Publications in Zoology, 1966. **78**: p. 1-36.
83. McNab, B.K., *Climatic adaptation in the energetics of heteromyid rodents*. Comparative Biochemistry and Physiology A, 1979. **62**(4): p. 813-820.
84. Dawson, W.R., *The relation of oxygen consumption to temperature in desert rodents*. Journal of Mammalogy, 1955. **36**: p. 543-553.
85. Breyen, L.J., W.G. Bradley, and M.K. Yousef, *Physiological and ecological studies on the chisel-toothed kangaroo rat Dipodomys microps*. Comparative Biochemistry and Physiology A, 1973. **44**: p. 543-555.
86. Hudson, J.W. and J.A. Rummel, *Water metabolism and temperature regulation of the primitive heteromyids, Liomys salvani and Liomys irroratus*. Ecology, 1966. **47**(3): p. 345-354.
87. Bartholomew, G.A. and R.E. MacMillen, *Oxygen consumption, estivation, and hibernation in the kangaroo mouse, Microdipodops pallidus*. Physiological Zoology, 1960. **34**: p. 177-183.
88. Chew, R.M., R.G. Lindberg, and P. Hayden, *Temperature regulation in the little pocket mouse, Perognathus longimerbris*. Comparative Biochemistry and Physiology, 1967. **21**: p. 487-505.

89. Haim, A., R.J. van Aarde, and J.D. Skinner, *Metabolism and thermoregulation in the Cape porcupine, Hystrix africae australis*. *Physiological Zoology*, 1990. **63**: p. 795-802.
90. Bozinovic, F. and M. Rosenmann, *Comparative energetics of south american cricetid rodents*. *Comparative Biochemistry and Physiology A*, 1988. **91**(1): p. 195-202.
91. Shkolnik, A. and A. Borut, *Temperature and water relations in two species of spiny mice (Acomys)*. *Journal of Mammalogy*, 1969. **50**(2): p. 245-255.
92. Haim, A., *Metabolism and thermoregulation in rodents: are these adaptations to habitat and food quality*. *South African Journal of Science*, 1987. **83**: p. 639-642.
93. Lovegrove, B.G., G. Heldmaier, and M. Knight, *Seasonal and circadian energetic patterns in an arboreal rodent, Thallomys paedulus, and a burrow-dwelling rodent, Aethomys namaquensis, from the Kalahari Desert (South Africa)*. *Journal of Thermal Biology*, 1991. **16**(4): p. 199-210.
94. Haim, A. and I. Izhaki, *Comparative physiology of thermoregulation in rodents: adaptation to arid and mesic environments*. *Journal of Arid Environments*, 1995. **31**(4): p. 431-440.
95. Haim, A. and I. Izhaki, *The ecological significance of resting metabolic rate and non-shivering thermogenesis for rodents*. *Journal of Thermal Biology*, 1993. **18**(2): p. 71-81.
96. McNab, B.K., *The comparative energetics of rigid endothermy: The Arvicolidae*. *Journal of Zoology*, 1992. **227**(4): p. 585-606.
97. Caviedes-Vidal, E., et al., *Facultative torpor in the South American rodent Calomys venustus (Rodentia: Cricetidae)*. *Journal of Mammalogy*, 1990. **71**(1): p. 72-75.
98. Knight, M.H., *Thermoregulation in the largest African cricetid, the giant rat Cricetomys gambianus*. *Comparative Biochemistry and Physiology A*, 1988. **89**(4): p. 705-708.
99. Downs, C.T. and M.R. Perrin, *Comparative aspects of the thermal biology of the short-tailed gerbil, Desmodillus auricularis, and the bushveld gerbil, Tatera leucogaster*. *Journal of Thermal Biology*, 1994. **19**(6): p. 385-392.
100. Downs, C.T. and M.R. Perrin, *Thermal parameters of four species of Gerbillurus*. *Journal of Thermal Biology*, 1990. **15**(3-4): p. 291-300.
101. Haim, A., *Adaptive variations in heat production within gerbils (genus Gerbillus) from different habitats*. *Oecologia*, 1984. **61**(1): p. 49-52.
102. Buffenstein, R. and J.U.M. Jarvis, *Thermoregulation and metabolism in the smallest African gerbil, Gerbillus pusillus*. *Journal of Zoology*, 1985. **205**: p. 107-121.
103. Robinson, P.F. and R.V. Hendrickson, *Metabolism of Gerbillus pyamidum*. *Nature*, 1961. **190**: p. 637-638.

104. Dawson, T.J. and F.D. Fanning, *Thermal and energetic problems of semiaquatic mammals: A study of the Australian water rat (Hydromys chrysogaster), including comparisons with the platypus (Ornithorhynchus anatinus)*. *Physiological Zoology*, 1981. **54**(3): p. 285-296.
105. Hill, R.W., *Metabolism, thermal conductance, and body temperature in one of the largest species of Peromyscus, P. pirrensis*. *Journal of Thermal Biology*, 1975. **1**: p. 109-112.
106. Hissa, R., *Calorigenic effect of noradrenaline in Norwegian lemmings, Lemmus lemmus (L.)*. *Experientia*, 1970. **26**: p. 266-267.
107. Haim, A., *Heat production and dissipation in a South African diurnal murid Lemniscomys griselda*. *South African Journal of Zoology*, 1981. **16**: p. 67-70.
108. Knight, M.H. and J.D. Skinner, *Thermoregulatory, reproductive and behavioural adaptations of the big eared desert mouse, Malacothrix typica to its arid environment*. *Journal of Arid Environments*, 1981. **4**: p. 137-145.
109. Haim, A. and F.L.R. Fourie, *Heat production in nocturnal (Praomys natalensis) and diurnal (Rhabdomys pumilio) South African murids*. *South African Journal of Zoology*, 1980. **15**(2): p. 91-94.
110. Goyal, S.P., P.K. Ghosh, and I. Prakash, *Energetic aspects of adaptation in the Indian desert gerbil Meriones hurrianaei Jerdon*. *Journal of Arid Environments*, 1981. **5**: p. 69-75.
111. Weiner, J. and A. Górecki, *Standard metabolic rate and thermoregulation in 5 species of Mongolian small mammals*. *Journal of Comparative Physiology B*, 1981. **145**(1): p. 127-132.
112. McDevitt, R.M. and J.R. Speakman, *Summer acclimatization in the short-tailed field vole, Microtus agrestis*. *Journal of Comparative Physiology B*, 1996. **166**(4): p. 286-293.
113. Ishii, K., et al., *The telemetric monitoring of heart rate, locomotor activity, and body temperature in mice and voles (Microtus arvalis) during ambient temperature changes*. *Laboratory Animals*, 1996. **30**(1): p. 7-12.
114. Li, Q., et al., *Cold adaptive thermogenesis in small mammals from different geographical zones of China*. *Comparative Biochemistry and Physiology A*, 2001. **129**(4): p. 949-961.
115. Kurta, A. and M. Ferkin, *The correlation between demography and metabolic rate: A test using the beach vole (Microtus breweri) and the meadow vole (Microtus pennsylvanicus)*. *Oecologia*, 1991. **87**(1): p. 102-105.
116. Downs, C.T. and M.R. Perrin, *The thermal biology of southern Africa's smallest rodent, Mus minutoides*. *South African Journal of Science*, 1996. **92**(6): p. 282-285.
117. Saarela, S. and R. Hissa, *Metabolism, thermogenesis and daily rhythm of body temperature in the wood lemming, Myopus schisticolor*. *Journal of Comparative Physiology B*, 1993. **163**: p. 546-555.
118. Downs, C.T. and M.R. Perrin, *The thermal biology of the white-tailed rat Mystromys albicaudatus, a cricetine relic in southern temperate African grassland*. *Comparative Biochemistry and Physiology A*, 1995. **110**: p. 65-69.

119. Nevo, E. and A. Shkolnik, *Adaptive metabolic variation of chromosome forms in mole rats, Spalax*. *Experientia*, 1974. **30**: p. 724-726.
120. MacMillen, R.E. and A.K. Lee, *Energy metabolism and pulmocutaneous water loss of Australian hopping mice*. *Comparative Biochemistry and Physiology A*, 1970. **35**: p. 355-369.
121. Layne, J.N. and P.G. Dolan, *Thermoregulation, metabolism, and water economy in the golden mouse (Ochrotomys nuttalli)*. *Comparative Biochemistry and Physiology A*, 1975. **52**: p. 153-163.
122. Richter, T.A., P.I. Webb, and J.D. Skinner, *Limits to the distribution of the southern African ice rat (Otomys sloggetti): Thermal physiology or competitive exclusion?* *Functional Ecology*, 1997. **11**(2): p. 240-246.
123. Du Plessis, A., T. Erasmus, and G.I.H. Kerley, *Thermoregulatory patterns of two sympatric rodents: Otomys unisulcatus and Parotomys brantsii*. *Comparative Biochemistry and Physiology A*, 1989. **94**(2): p. 215-220.
124. McNab, B.K. and P. Morrison, *Body temperature and metabolism in subspecies of Peromyscus from arid and mesic environments*. *Ecological Monographs*, 1963. **33**(1): p. 63-82.
125. Glenn, M.E., *Water relations in three species of deer mice (Peromyscus)*. *Comparative Biochemistry and Physiology*, 1970. **33**: p. 231-248.
126. Tannenbaum, M.G. and E.B. Pivorun, *Seasonal study of daily torpor in southeastern Peromyscus maniculatus and Peromyscus leucopus from mountains and foothills*. *Physiological Zoology*, 1988. **61**(1): p. 10-16.
127. Tomasi, T.E., *Basal metabolic rates and thermoregulatory abilities in 4 small mammals*. *Canadian Journal of Zoology*, 1985. **63**(11): p. 2534-2537.
128. Hayward, J.S., *Metabolic rate and its temperature-adaptive significance in six geographic races of Peromyscus*. *Canadian Journal of Zoology*, 1965. **43**: p. 309-323.
129. Weiner, J. and G. Heldmaier, *Metabolism and thermoregulation in two races of Djungarian hamsters: Phodopus sungorus sungorus and Phodopus sungorus campbelli*. *Comparative Biochemistry and Physiology A*, 1987. **86**(4): p. 639-642.
130. Bozinovic, F., *Rate of basal metabolism of grazing rodents from different habitats*. *Journal of Mammalogy*, 1992. **73**(2): p. 379-384.
131. Dawson, T.J. and W.R. Dawson, *Metabolic scope and conductance in response to cold of some dasyurid marsupials and Australian rodents*. *Comparative Biochemistry and Physiology A*, 1981. **71**(1): p. 59-64.
132. MacMillen, R.E., R.V. Baudinette, and A.K. Lee, *Water economy and energy metabolism of the sandy inland mouse, Leggadina hermannsbergensis*. *Journal of Mammalogy*, 1972. **53**: p. 529-539.
133. Collins, B.G., *The ecological significance of thermoregulatory responses to heat stress shown by two populations of an Australian murid, Rattus fuscipes*. *Comparative Biochemistry and Physiology A*, 1973. **44**: p. 1129-1140.
134. Collins, B.G., *Physiological responses to temperature stress by an Australian murid, Rattus lutreolus*. *Journal of Mammalogy*, 1973. **54**: p. 356-368.



135. Hinds, D.S. and C.N. Rice-Warner, *Maximum metabolism and aerobic capacity in heteromyid and other rodents*. *Physiological Zoology*, 1992. **65**: p. 188-214.
136. Pearson, O.P., *The oxygen consumption and bioenergetics of harvest mice*. *Physiological Zoology*, 1960. **33**: p. 152-160.
137. Haim, A., et al., *Seasonal acclimation and thermoregulation in the pouched mouse *Saccostomus campestris**. *Journal of Thermal Biology*, 1991. **16**: p. 13-17.
138. Hill, R.W. and E.T. Hooper, *Temperature regulation in mice of the genus *Scotiomys**. *Journal of Mammalogy*, 1971. **52**: p. 806-816.
139. Bowers, J.R., *Resting metabolic rate in the cotton rat *Sigmodon**. *Physiological Zoology*, 1971. **44**: p. 137-147.
140. Ellison, G.T.H., *Thermoregulatory responses on cold acclimated fat mice (*Steatomys pratensis*)*. *Journal of Mammalogy*, 1995. **76**(1): p. 240-247.
141. Duxbury, K.J. and M.R. Perrin, *Thermal biology and water turnover rate in the Cape gerbil, *Tatera afra* (Gerbillidae)*. *Journal of Thermal Biology*, 1992. **17**(4-5): p. 199-208.
142. Bozinovic, F. and F.F. Novoa, *Metabolic costs of rodents feeding on plant chemical defences: A comparison between an herbivore and an omnivore*. *Comparative Biochemistry and Physiology A*, 1997. **117**(4): p. 511-514.
143. Bozinovic, F. and L.C. Contreras, *Basal rate of metabolism and temperature regulation of two desert herbivorous octodontid rodents: *Octomys mimax* and *Typmanoctomys barrerae**. *Oecologia*, 1990. **84**: p. 567-570.
144. Contreras, L.C., *Bioenergetics and thermal distribution of fossorial *Spalacopus cyanus* (Rodentia): thermal stress, or cost of burrowing*. *Physiological Zoology*, 1986. **59**(1): p. 20-28.
145. Müller, E.F., J.M.Z. Kamau, and G.M.O. Maloiy, *O<sub>2</sub>-uptake, thermoregulation and heart rate in the springhare (*Pedetes capensis*)*. *Journal of Comparative Physiology*, 1979. **133**(3): p. 187-191.
146. Chappell, M.A. and G.A. Bartholomew, *Activity and thermoregulation of the antelope ground squirrel *Ammospermophilus leucurus* in winter and summer*. *Physiological Zoology*, 1981. **54**(2): p. 215-223.
147. Chappell, M.A. and G.A. Bartholomew, *Standard operative temperatures and thermal energetics of the antelope ground squirrel *Ammospermophilus leucurus**. *Physiological Zoology*, 1981. **54**(1): p. 81-93.
148. Reinking, L.N., et al., *Temperature regulation in normothermic black-tailed prairie dogs, *Cynomys ludovicianus**. *Comparative Biochemistry and Physiology A*, 1977. **57**: p. 161-165.
149. Viljoen, S., *Comparative thermoregulatory adaptations of southern African tree squirrels from four different habitats*. *South African Journal of Zoology*, 1985. **20**: p. 28-32.
150. Stapp, P., *Energetic influences on the life history of *Glaucomys volans**. *Journal of Mammalogy*, 1992. **73**(4): p. 914-920.
151. Benedict, F.G., *Vital energetics: A study in comparative basal metabolism*. Carnegie Institution of Washington Publication Number 503. 1938, Washington, D.C.: Carnegie Institution of Washington.

152. Golightly, R.T. and R.D. Ohmart, *Heterothermy in free-ranging Abert's squirrels (Sciurus aberti)*. Ecology, 1978. **59**: p. 897-909.
153. Bolls, N.J. and J.R. Perfect, *Summer resting metabolic rate of the gray squirrel*. Physiological Zoology, 1972. **45**: p. 54-59.
154. Hudson, J.W., D.R. Deavers, and S.R. Bradley, *A comparative study of temperature regulation in ground squirrels with special reference to the desert species*. Symposia of the Zoological Society of London, 1972. **31**: p. 191-213.
155. Baudinette, R.V., *Energy metabolism and evaporative water loss in the California ground squirrel: effect of burrow temperature and water vapour pressure*. Journal of Comparative Physiology, 1972. **81**: p. 57-72.
156. Maclean, G.S., *Torpor patterns and microenvironment of the eastern chipmunk, Tamias striatus*. Journal of Mammalogy, 1981. **62**(1): p. 64-73.
157. Jones, D.L. and L.C.H. Wang, *Metabolic and cardiovascular adaptations in western chipmunks, genus Eutamias*. Journal of Comparative Physiology, 1976. **105**: p. 219-231.
158. Kenagy, G.J. and D. Vleck, *Daily temporal organization of metabolism in small mammals: Adaptation and diversity*, in *Vertebrate circadian systems: structure and physiology*, J. Aschoff, S. Daan, and G.A. Groos, Editors. 1982, Springer-Verlag: Berlin. p. 322-338.
159. Wunder, B.A., *Temperature regulation and the effects of water restriction on Merriam's chipmunk Eutamias merriami*. Comparative Biochemistry and Physiology, 1970. **33**: p. 385-403.
160. Willems, N.J. and K.B. Armitage, *Thermoregulation and water requirements in semiarid and montane populations of the least chipmunk Eutamias minimus*. Comparative Biochemistry and Physiology A, 1975. **51**: p. 717-722.
161. Wang, L.C. and J.W. Hudson, *Temperature regulation in normothermic and hibernating eastern chipmunk, Tamias striatus*. Comparative Biochemistry and Physiology A, 1971. **31**(1): p. 59-90.
162. Pauls, R.W., *Energetics of the red squirrel: a laboratory study of the effects of temperature, seasonal acclimation, use of the nest and exercise*. Journal of Thermal Biology, 1981. **6**: p. 79-86.
163. Haim, A., J.D. Skinner, and T.J. Robinson, *Bioenergetics, thermoregulation and urine analysis of squirrels of the genus Xerus from an arid environment*. South African Journal of Zoology, 1987. **22**(1): p. 45-49.
164. Whittow, G.C. and E. Gould, *Body temperature and oxygen consumption of the pentail tree shrew (Ptilocercus lowii)*. Journal of Mammalogy, 1976. **57**: p. 754-756.
165. Bradley, S.R. and J.W. Hudson, *Temperature regulation in the tree shrew, Tupaia glis*. Comparative Biochemistry and Physiology A, 1974. **48**: p. 55-60.
166. McNab, B.K., *The energetics of arboreal folivores: physiological problems and ecological consequences of feeding on an ubiquitous food supply*, in *The ecology of arboreal folivores*, G.G. Montgomery, Editor. 1978, Smithsonian Institution Press: Washington. p. 153-162.

167. Withers, P.C., G.G. Thompson, and R.S. Seymour, *Metabolic physiology of the north-western marsupial mole, Notoryctes caurinus (Marsupialia: Notoryctidae)*. Australian Journal of Zoology, 2000. **48**(3): p. 241-258.
168. Geiser, F., *Daily torpor and thermoregulation in Antechinus (Marsupialia): influence of body mass, season, development, reproduction, and sex*. Oecologia, 1988. **77**: p. 395-399.
169. Chappell, M.A. and T.J. Dawson, *Ventilatory accommodation of changing oxygen consumption in dasyurid marsupials*. Physiological Zoology, 1994. **67**(2): p. 418-437.
170. Hulbert, A.J. and T.J. Dawson, *Standard metabolism and body temperature of perameloid marsupials from different environments*. Comparative Biochemistry and Physiology A, 1974. **47**: p. 583-590.
171. Wells, R.T., *Thermoregulation and activity rhythms in the hairy-nosed wombat, Lasiorhinus latifrons (Owen), (Vombatidae)*. Australian Journal of Zoology, 1978. **26**(4): p. 639-651.
172. Rübsamen, U., I.D. Hume, and K. Rübsamen, *Effect of ambient temperature on autonomic thermoregulation and activity patterns in the rufus rat-kangaroo (Aepyprimnus rufescens: Marsupialia)*. Journal of Comparative Physiology B, 1983. **153**: p. 175-179.
173. Kinnear, A. and J.W. Shield, *Metabolism and temperature regulation in marsupials*. Comparative Biochemistry and Physiology A, 1975. **52**: p. 235-246.
174. Bech, C. and S.C. Nicol, *Thermoregulation and ventilation in the tawny frogmouth, Podargus strigoides: a low-metabolic avian species*. Australian Journal of Zoology, 1999. **47**(2): p. 143-153.
175. Chaplin, S.B., *The energetic significance of huddling behavior in common bushtits (Psaltriparus minimus)*. Auk, 1982. **99**(3): p. 424-430.
176. Ganey, J.L., R.P. Balda, and R.M. King, *Metabolic rate and evaporative water loss of Mexican spotted and great horned owls*. Wilson Bulletin, 1993. **105**(4): p. 645-656.
177. Hayworth, A.M. and W.W. Weathers, *Temperature regulation and climatic adaptation in black-billed and yellow-billed magpies*. Condor, 1984. **86**(1): p. 19-26.
178. Lasiewski, R.C. and W.R. Dawson, *Physiological responses to temperature in the common nighthawk*. Condor, 1964. **66**: p. 477-490.
179. Ligon, J.D., *Some aspects of temperature regulation in small owls*. The Auk, 1969. **86**: p. 458-472.
180. López-Calleja, M.V. and F. Bozinovic, *Maximum metabolic rate, thermal insulation and aerobic scope in a small-sized Chilean hummingbird (Sephanoides sephanoides)*. The Auk, 1995. **112**(4): p. 1034-1036.
181. Maddocks, T.A. and F. Geiser, *Energetics, thermoregulation and nocturnal hypothermia in Australian Silvereyes*. Condor, 1997. **99**(1): p. 104-112.
182. McKechnie, A.E. and B.G. Lovegrove, *Heterothermic responses in the speckled mousebird (Colius striatus)*. Journal of Comparative Physiology B, 2001. **171**(6): p. 507-518.

183. McKechnie, A.E. and B.G. Lovegrove, *Thermoregulation and the energetic significance of clustering behavior in the white-backed mousebird (Colius colius)*. *Physiological and Biochemical Zoology*, 2001. **74**(2): p. 238-249.
184. McKechnie, A.E. and B.G. Lovegrove, *Facultative hypothermic responses in an Afrotropical arid-zone passerine, the red-headed finch (Amadina erythrocephala)*. *Journal of Comparative Physiology B*, 2003. **173**(4): p. 339-346.
185. Merola-Zwartjes, M., *Metabolic rate, temperature regulation, and the energetic implications of roost nests in the Bananaquit (Coereba flaveola)*. *Auk*, 1998. **115**(3): p. 780-786.
186. Mock, P.J., *Daily allocation of time and energy of western bluebirds feeding nestlings*. *Condor*, 1991. **93**(3): p. 598-611.
187. Rasmussen, P.C. and R. Brander, *Standard metabolic rate and lower critical temperature for the ruffed grouse*. *The Wilson Bulletin*, 1973. **85**(2): p. 223-229.
188. Rising, J.D. and J.W. Hudson, *Seasonal variation in the metabolism and thyroid activity of the black-capped chickadee (Parus atricapillus)*. *Condor*, 1974. **76**: p. 198-203.
189. Schleucher, E., *Energy metabolism in an obligate frugivore, the superb fruit-dove (Ptilinopus superbus)*. *Australian Journal of Zoology*, 1999. **47**(2): p. 169-179.
190. Schleucher, E., *Metabolism, body temperature and thermal conductance of fruit-doves (Aves : Columbidae, Treroninae)*. *Comparative Biochemistry and Physiology A*, 2002. **131**(2): p. 417-428.
191. Schleucher, E. and P.C. Withers, *Metabolic and thermal physiology of pigeons and doves*. *Physiological and Biochemical Zoology*, 2002. **75**(5): p. 439-450.
192. Vitali, S.D., P.C. Withers, and K.C. Richardson, *Standard metabolic rates of three nectarivorous meliphagid passerine birds*. *Australian Journal of Zoology*, 1999. **47**(4): p. 385-391.
193. Wasser, J.S., *The relationship of energetics of falconiform birds to body mass and climate*. *Condor*, 1986. **88**(1): p. 57-62.
194. Weathers, W.W. and C. van Riper, *Temperature regulation in 2 endangered Hawaiian honeycreepers - the palila (Psittirostra bailleui) and the laysan finch (Psittirostra cantans)*. *Auk*, 1982. **99**(4): p. 667-674.
195. Weathers, W.W., D.L. Weathers, and C. Vanriper, *Basal metabolism of the apapane - comparison of freshly caught birds with long-term captives*. *Auk*, 1983. **100**(4): p. 977-978.
196. Williams, J.B., et al., *Metabolism and water flux of captive and free-living australian parrots*. *Australian Journal of Zoology*, 1991. **39**(2): p. 131-142.
197. Withers, P.C. and J.B. Williams, *Metabolic and respiratory physiology of an arid-adapted Australian bird, the spinifex pigeon*. *Condor*, 1990. **92**(4): p. 961-969.
198. Roberts, J.R. and R.V. Baudinette, *Thermoregulation, oxygen consumption and water turnover in stubble quail, Coturnix pectoralis, and king quail, Coturnix chinensis*. *Australian Journal of Zoology*, 1986. **34**(1): p. 25-33.

199. Weathers, W.W., *Temperature regulation in the dusky munia, Lonchura fuscans (Cassin) (Estrildidae)*. Australian Journal of Zoology, 1977. **25**: p. 193-199.
200. Hennemann, W.W., *Environmental influences on the energetics and behavior of anhingas and double-crested cormorants*. Physiological Zoology, 1983. **56**(2): p. 201-216.
201. Rising, J.D., *A comparison of metabolism and evaporative water loss of Baltimore and bullock orioles*. Comparative Biochemistry and Physiology, 1969. **31**: p. 915-925.
202. Bartholomew, G.A., C.M. Vleck, and T.L. Bucher, *Energy metabolism and nocturnal hypothermia in 2 tropical passerine frugivores, Manacus vitellinus and Pipra mentalis*. Physiological Zoology, 1983. **56**(3): p. 370-379.
203. Weathers, W.W., *Physiological thermoregulation in heat-stressed birds - consequences of body size*. Physiological Zoology, 1981. **54**(3): p. 345-361.
204. Hinsley, S.A., et al., *Black-bellied sandgrouse (Pterocles orientalis) and pin-tailed sandgrouse (Pterocles alchata) - closely related species with differing bioenergetic adaptations to arid zones*. Physiological Zoology, 1993. **66**(1): p. 20-42.
205. Hinds, D.S. and W.A. Calder, *Temperature regulation of the pyrrhuloxia and the Arizona cardinal*. Physiological Zoology, 1973. **46**: p. 55-71.
206. Dawson, W.R. and C. Carey, *Seasonal acclimatization to temperature in cardueline finches*. Journal of Comparative Physiology, 1976. **112**: p. 317-333.
207. Lustick, S., B. Battersby, and M. Kelty, *Behavioral thermoregulation: orientation toward the sun in herring gulls*. Science, 1978. **200**: p. 81-83.
208. Collins, B.G., G. Cary, and S. Payne, *Metabolism, thermoregulation and evaporative water loss in 2 species of Australian nectar-feeding birds (family Meliphagidae)*. Comparative Biochemistry and Physiology A, 1980. **67**(4): p. 629-635.
209. Calder, W.A. and K. Schmidt-Nielsen, *Temperature regulation and evaporation in the pigeon and the roadrunner*. American Journal of Physiology, 1967. **213**(4): p. 883-889.
210. Yarbrough, C.G., *The influence of distribution and ecology on the thermoregulation of small birds*. Comparative Biochemistry and Physiology A, 1971. **39**: p. 235-266.
211. MacMillen, R.E. and C.H. Trost, *thermoregulation and water loss in the inca dove*. Comparative Biochemistry and Physiology, 1967. **20**: p. 263-273.
212. Drent, R.H. and B. Stonehouse, *Thermoregulatory responses of the peruvian penguin, Spheniscus humboldti*. Comparative Biochemistry and Physiology A, 1971. **40**: p. 689-710.
213. Merola-Zwartjes, M. and J.D. Ligon, *Ecological energetics of the Puerto Rican tody: heterothermy, torpor, and intra-island variation*. Ecology, 2000. **81**(4): p. 990-1003.

214. Lewis, L.Y. and R.E. Gatten Jr, *Aerobic metabolism of American alligators, Alligator mississippiens, under standard conditions and during voluntary activity*. Comparative Biochemistry and Physiology, 1985. **80A**: p. 441-447.
215. Andrews, R.M. and F.H. Pough, *Metabolism of squamate reptiles: allometric and ecological relationships*. Physiological Zoology, 1985. **58**(2): p. 214-231.
216. AL-Sadoon, M.K., *Influence of a broad range of temperatures on the oxygen consumption rates of three desert lizard species*. Comparative Biochemistry and Physiology, 1986. **84A**: p. 339.
217. AL-Sadoon, M.K. and I.F. Spellerberg, *Effect of temperature on the oxygen consumption of lizards from different climatic regions*. Amphibia-Reptilia, 1985. **6**: p. 241-258.
218. Bedford, G.S. and K.A. Christian, *Stard metabolic rate and preferred body temperatures in some Australian pythons*. Australian Journal of Zoology, 1998. **46**: p. 317-328.
219. Chappell, M.A. and T.M. Ellis, *Resting metabolic rates in boid snakes: Allometric relationships and temperature effects*. Journal of Comparative Physiology B, 1987. **157**(2): p. 227-236.
220. Bartholomew, G.A. and R.C. Lasiewski, *Heating and cooling rates, heart rate and simulated diving in the Galapagos marine iguana*. Comparative Biochemistry and Physiology, 1965. **16**: p. 573-582.
221. Bennett, A.F., W.R. Dawson, and G.A. Bartholomew, *Effects of activity and temperature on aerobic and anaerobic metabolism in the Galapagos marine iguana*. Journal of Comparative Physiology, 1975. **100**: p. 317-329.
222. Bartholomew, G.A. and V.A. Tucker, *Control of changes in body temperature, metabolism, and circulation by the agamid lizard, Amphibolurus barbatus*. Physiological Zoology, 1963. **36**: p. 199-218.
223. Else, P.L. and A.J. Hulbert, *Comparison of the mammal machine and the reptile machine: energy production*. American Journal of Physiology, 1981. **240R**: p. 3-9.
224. Garland, J.T. and P.L. Else, *Seasonal, sexual and individual variation in endurance and activity metabolism in lizards*. American Journal of Physiology, 1987. **252R**: p. 439-449.
225. Putnam, R.W. and R.W. Murphy, *Low metabolic rate in a nocturnal desert lizard, Anarbylus switaki Murphy*. Comparative Biochemistry and Physiology, 1982. **71A**: p. 119-123.
226. Fusari, M.H., *Temperature responses of standard, aerobic metabolism by the California legless lizard, Anniella pulchra*. Comparative Biochemistry and Physiology, 1994. **77A**(1): p. 97-101.
227. Kamel, S. and R.E. Gatten Jr, *Aerobic and anaerobic activity metabolism of limbless and fossorial reptiles*. Physiological Zoology, 1983. **56**(3): p. 419-429.
228. AL-Sadoon, M.K. and N.M. Abdo, *Temperature effects on oxygen consumption of two nocturnal gekos, Ptyodactylus hasselquistii and Bunopus tuberculatus in Saudi Arabia*. Journal of Comparative Physiology, 1989. **159**: p. 1-4.

229. AL-Sadoon, M.K. and I.F. Spellerberg, *Comparison of thermal acclimation effects on the metabolism of Chalcides ocellatus (desert lizard) and Lacerta vivipara (cool-temperate lizard)*. Comparative Biochemistry and Physiology, 1985. **81A**(4): p. 939-943.
230. AL-Sadoon, M.K. and I.F. Spellerberg, *Metabolism of the lizard Chalcides ocellatus (forskal) from Egypt*. Journal of Arid Environments, 1987. **12**: p. 159-168.
231. Ruben, J.A., *Aerobic and anaerobic metabolism during activity in snakes*. Journal of Comparative Physiology, 1976. **109**: p. 147-157.
232. Bennett, A.F. and W.R. Dawson, *Aerobic and anaerobic metabolism during activity in the lizard Dipsosaurus dorsalis*. Journal of Comparative Physiology, 1972. **81**: p. 289-299.
233. Cortés, A., et al., *Body temperature, activity cycle and metabolic rate in a small nocturnal Chilean lizard, Garthia gaudichaudi*. Comparative Biochemistry and Physiology, 1994. **109A**(4): p. 967-973.
234. Mautz, W.J., *The metabolism of reclusive lizards, the Xantusiidae*. Copeia, 1979. **1979**(4): p. 577-584.
235. Patterson, J.W. and P.M.C. Davies, *A possible effect of climate on resting metabolic rate in lizards*. Copeia, 1989. **1989**(3): p. 719-723.
236. Hailey, A. and P.M.C. Davies, *Lifestyle, latitude and activity metabolism of natricine snakes*. Journal of Zoology, 1986. **209**: p. 461-476.
237. Greenwald, O.E., *The effect of body temperature on oxygen consumption and heart rate in the Sonora Gopher Snake, Pituophis catenifer affinis Hallowell*. Copeia, 1971. **1971**(1): p. 98-106.
238. Bennett, A.F., *The effect of activity on oxygen consumption, oxygen debt, and heart rate in the lizards Varanus gouldii and Sauromalus hispidus*. Journal of Comparative Physiology, 1972. **79**: p. 259-280.
239. Tsuji, J.S., *Thermal acclimation of metabolism in sceloporus lizards from different latitudes*. Physiological Zoology, 1988. **61**(3): p. 241-253.
240. Dawson, W.R. and G.A. Bartholomew, *Relation of oxygen consumption to body weight, temperature, and temperature acclimation in lizards Uta stansburiana and Sceloporus occidentalis*. Physiological Zoology, 1956. **29**: p. 41-51.
241. Bennett, A.F. and T.G. Todd, *Activity metabolism in the lizard Sceloporus occidentalis*. Physiological Zoology, 1976. **49**: p. 65-76.
242. Cleveland, F. and G.R. Brooks, *Oxygen consumption, rate of heart beat and ventilatory rate in parietal;ectomized lizards, Sceloporus occidentalis*. Comparative Biochemistry and Physiology, 1970. **35**: p. 463-469.
243. Gleeson, T.T., *The effects of training and capacity on the metabolic capacity of the lizard Sceloporus occidentalis*. Journal of Comparative Physiology, 1979. **129**: p. 123-128.
244. Dmi'ek, R. and A. Borut, *Thermal behaviour, heat exchange and metabolism in the desert snake Spalerosophis cliffordi*. Physiological Zoology, 1972. **100**: p. 78-94.
245. Aleksiuik, M., *Temperature-dependant shifts in the metabolism of a cool temperate reptile, Thamnophis sivalis parietalis*. Comparative Biochemistry and Physiology, 1971. **39A**: p. 495-503.

246. Christian, K.A. and K.E. Conley, *Activity and resting metabolism of varanid lizards compared with "typical" lizards*. Australian Journal of Zoology, 1994. **42**: p. 185-193.
247. Zari, T.A., *The influence of body mass and temperature on the standard metabolic rate of the herbivorous dessert lizard, Uromastyx microlepis*. Journal of Thermal Biology, 1991. **16**(3): p. 129-133.
248. Wood, S.C., et al., *Aerobic metabolism of the lizard Varanus exanthematicus: Effects of activity, temperature and size*. Journal of Comparative Physiology, 1978. **127**: p. 331-336.
249. Thompson, G.G., et al., *Standard metabolic rate of the largest Australian lizard, Varanus giganteus*. Comparative Biochemistry and Physiology, 1995. **111A**: p. 603-608.
250. Bickler, *Ventilation, gas exchange and aerobic scope in a small monitor lizard, Varanus gilleni*. Physiological Zoology, 1986. **59**: p. 76-83.
251. Thompson, G.G. and P.C. Withers, *Effects of body mass and temperature on standard metabolic rates for two Australian Varanid lizards (Varanus gouldii and V. panoptes)*. Copeia, 1992. **1992**(2): p. 343-350.
252. Gatten Jr, R.E., *Aerobic metabolism in snapping turtles, Chelydra serpentina, after thermal acclimation*. Comparative Biochemistry and Physiology, 1978. **61A**: p. 325-337.
253. Gatten Jr, R.E., *Effects of temperature and activity on aerobic and anaerobic metabolism and heart rate in the turtles Pseudemys scripta and Terrapene ornata*. Comparative Biochemistry and Physiology, 1974. **48**: p. 619-648.
254. Bokma, F., *Evidence against universal metabolic allometry*. Functional Ecology, 2004. **18**(2): p. 184-187.
255. Gatten Jr, R.E., K. Miller, and R.J. Full, *Energetics at rest and during locomotion*, in *Environmental physiology of the amphibians*, M.E. Feder and W.W. Burggren, Editors. 1992, University of Chicago Press: Chicago. p. 275-377.
